# Supplementary material for: Comparative Transcriptome Analysis of Two Sweet Sorghum Genotypes with Different Salt Tolerance Abilities to Reveal the Mechanism of Salt Tolerance
Source: Int J Mol Sci. 2022 Feb 18;23(4):2272. doi: 10.3390/ijms23042272 (PMC8877675; doi:10.3390/ijms23042272)
Supplement: Supplementary file 1 [file ijms-23-02272-s001.zip]

Archive with 7 entries (7 files):
- ijms-1568163-supplymentary.pdf
- TableS1-clean reads.xlsx
- TableS2-ME-GO.xlsx
- TableS3-secondary.xlsx
- TableS4-hormone.xlsx
- TableS5-DE TFs.xlsx
- TableS6-qRT-PCR primer.xlsx
