# Supplementary material for: Comparative Transcriptome Analysis of Two Sweet Sorghum Genotypes with Different Salt Tolerance Abilities to Reveal the Mechanism of Salt Tolerance
Source: Int J Mol Sci. 2022 Feb 18;23(4):2272. doi: 10.3390/ijms23042272 (PMC8877675; doi:10.3390/ijms23042272)
Supplement: Supplementary file 1 [file ijms-23-02272-s001.zip › TableS1-clean reads.xlsx]

## Sheet: Table S1
Table S1 Quality of clean data and mapping rate in each sample
Samples	Total Reads	Total Nucleotides(bp)	Q30 Percentage (%)	Mapping Rate(%)
Rio-CK-1	41311128	6165872242	93.64	93.67
Rio-CK-2	38329396	5720915522	93.62	93.76
Rio-CK-3	37127172	5541048362	93.605	93.53
Rio-1h-1	41409744	6181066910	93.71	93.64
Rio-1h-2	40308394	6016389676	93.66	93.54
Rio-1h-3	43906808	6553399918	93.66	93.69
Rio-2h-1	39692374	5924458992	93.7	93.97
Rio-2h-2	44465120	6637007844	93.685	93.55
Rio-2h-3	43916340	6555153776	93.68	93.72
Rio-6h-1	43253558	6455574850	93.625	93.83
Rio-6h-2	38622972	5764428578	93.6	93.93
Rio-6h-3	41662028	6218131676	93.615	93.84
Rio-12h-1	39159992	5844367236	93.585	93.79
Rio-12h-2	40543752	6050719082	93.57	93.68
Rio-12h-3	39351916	5872686358	93.585	93.82
Rio-24h-1	41209234	6150682360	93.545	94.11
Rio-24h-2	40752272	6082210598	93.58	94.21
Rio-24h-3	41057784	6127986446	93.545	93.95
SN005-CK-1	46132854	6887512150	93.82	91.86
SN005-CK-2	38332304	5723486820	93.77	91.74
SN005-CK-3	41833618	6246019650	93.79	91.97
SN005-1h-1	45521936	6799236236	93.88	92.4
SN005-1h-2	39484708	5896144558	93.89	92.52
SN005-1h-3	43860318	6549320536	93.945	92.68
SN005-2h-1	40676684	6074912160	93.84	92.81
SN005-2h-2	44797026	6689476892	93.82	92.18
SN005-2h-3	41490380	6195911102	93.795	92.18
SN005-6h-1	43074474	6431554268	93.68	92.72
SN005-6h-2	46450690	6935636938	93.745	92.57
SN005-6h-3	44430570	6634189664	93.67	92.6
SN005-12h-1	44830248	6692604928	93.74	92.93
SN005-12h-2	46230896	6903253100	93.675	92.84
SN005-12h-3	45670644	6819804630	93.77	92.76
SN005-24h-1	39831832	5945128460	93.595	92.26
SN005-24h-2	45525366	6796880782	93.695	93.09
SN005-24h-3	43089062	6432631990	93.63	92.89
