# Supplementary material for: Comparative Transcriptome Analysis of Two Sweet Sorghum Genotypes with Different Salt Tolerance Abilities to Reveal the Mechanism of Salt Tolerance
Source: Int J Mol Sci. 2022 Feb 18;23(4):2272. doi: 10.3390/ijms23042272 (PMC8877675; doi:10.3390/ijms23042272)
Supplement: Supplementary file 1 [file ijms-23-02272-s001.zip › TableS2-ME-GO.xlsx]

## Sheet: Sheet1
Table S2 Top10 significant enrichment GO terms for WGCNA co-expression modules.
	All DEGs in two genotypes			Common response DEGs			RIO specific response DEGs			SN005 specific response DEGs
WGCNA modules	GO_id	Term	P-VALUE	GO_id	Term	P-VALUE	GO_id	Term	P-VALUE	GO_id	Term	P-VALUE
ME1	GO:0006629	lipid metabolic process	7.78e-10	GO:0006325	chromatin organization	4.8e-06	GO:0006629	lipid metabolic process	8.3e-07	GO:0009653	anatomical structure morphogenesis	1.19e-07
	GO:0006631	fatty acid metabolic process	1.13e-07	GO:0009698	phenylpropanoid metabolic process	2.77e-05	GO:0044283	small molecule biosynthetic process	6.71e-06	GO:0048856	anatomical structure development	4.96e-06
	GO:0005975	carbohydrate metabolic process	3.17e-07	GO:0006629	lipid metabolic process	2.89e-05	GO:0008610	lipid biosynthetic process	7.41e-06	GO:0009886	post-embryonic morphogenesis	5.43e-06
	GO:0009886	post-embryonic morphogenesis	1.35e-06	GO:0005975	carbohydrate metabolic process	0.00019474	GO:0055114	oxidation-reduction process	2.02e-05	GO:0032502	developmental process	1.3e-05
	GO:0009628	response to abiotic stimulus	1.58e-06	GO:0005976	polysaccharide metabolic process	0.000335069	GO:0016053	organic acid biosynthetic process	4.54e-05	GO:0048731	system development	3.35e-05
	GO:0050896	response to stimulus	9e-06	GO:0050896	response to stimulus	0.000348524	GO:0010025	wax biosynthetic process	6.22e-05	GO:0048646	anatomical structure formation involved in morphogenesis	0.000122947
	GO:0009725	response to hormone	9.13e-06	GO:0043933	macromolecular complex subunit organization	0.000374065	GO:0006631	fatty acid metabolic process	7.71e-05	GO:0048367	shoot system development	0.000157547
	GO:1901700	response to oxygen-containing compound	1.61e-05	GO:0019748	secondary metabolic process	0.000407831	GO:0042440	pigment metabolic process	7.91e-05	GO:0032501	multicellular organismal process	0.000205981
	GO:0055114	oxidation-reduction process	2.2e-05	GO:0009755	hormone-mediated signaling pathway	0.000434299	GO:0009628	response to abiotic stimulus	9.86e-05	GO:0009791	post-embryonic development	0.000431182
	GO:0006325	chromatin organization	3.35e-05	GO:0009725	response to hormone	0.000535647	GO:0010166	wax metabolic process	0.00010223
ME2	GO:0006725	cellular aromatic compound metabolic process	6.07e-15	GO:0006725	cellular aromatic compound metabolic process	9.78e-17	GO:0006807	nitrogen compound metabolic process	1.24e-08	GO:0042221	response to chemical	0.0161244
	GO:1901360	organic cyclic compound metabolic process	1.68e-14	GO:1901360	organic cyclic compound metabolic process	3.08e-16	GO:0046483	heterocycle metabolic process	2.48e-07	GO:0042886	amide transport	0.0226428
	GO:0046483	heterocycle metabolic process	4.38e-14	GO:0046483	heterocycle metabolic process	5.27e-15	GO:1901360	organic cyclic compound metabolic process	3.44e-07	GO:1901700	response to oxygen-containing compound	0.0291124
	GO:0006807	nitrogen compound metabolic process	4.42e-14	GO:0006807	nitrogen compound metabolic process	1.03e-13	GO:0006725	cellular aromatic compound metabolic process	6.65e-07	GO:0051234	establishment of localization	0.0312396
	GO:0034641	cellular nitrogen compound metabolic process	6.02e-13	GO:0006139	nucleobase-containing compound metabolic process	4.02e-13	GO:0006139	nucleobase-containing compound metabolic process	3.66e-06	GO:0051179	localization	0.0408177
	GO:0006139	nucleobase-containing compound metabolic process	2.04e-12	GO:0090304	nucleic acid metabolic process	9.77e-11	GO:0090304	nucleic acid metabolic process	7.72e-06	GO:0014070	response to organic cyclic compound	0.0453022
	GO:0090304	nucleic acid metabolic process	1.36e-10	GO:0019438	aromatic compound biosynthetic process	5.75e-10	GO:0071704	organic substance metabolic process	0.000110414	GO:0006810	transport	0.0478378
	GO:0019438	aromatic compound biosynthetic process	8.17e-07	GO:1901362	organic cyclic compound biosynthetic process	1.31e-09	GO:1901564	organonitrogen compound metabolic process	0.000122684	GO:0048443	stamen development	0.0497173
	GO:1901362	organic cyclic compound biosynthetic process	1.09e-06	GO:0018130	heterocycle biosynthetic process	4.13e-08	GO:0044260	cellular macromolecule metabolic process	0.000276632	GO:0048466	androecium development	0.0497173
	GO:1901564	organonitrogen compound metabolic process	1.17e-06	GO:1901564	organonitrogen compound metabolic process	2.57e-06	GO:0044281	small molecule metabolic process	0.000442213	GO:0009719	response to endogenous stimulus	0.0499309
ME3	GO:0009628	response to abiotic stimulus	1.86e-10	GO:0006950	response to stress	8.63e-09	GO:1901566	organonitrogen compound biosynthetic process	9.75e-05	GO:0009311	oligosaccharide metabolic process	0.00634118
	GO:0010035	response to inorganic substance	6.54e-08	GO:1901700	response to oxygen-containing compound	7.62e-08	GO:1901564	organonitrogen compound metabolic process	0.000170056	GO:0005991	trehalose metabolic process	0.00668397
	GO:1901700	response to oxygen-containing compound	6.62e-08	GO:0009628	response to abiotic stimulus	1.44e-07	GO:1901576	organic substance biosynthetic process	0.000197848	GO:0010035	response to inorganic substance	0.00917619
	GO:0006950	response to stress	2.71e-07	GO:0009415	response to water	3.18e-06	GO:0010035	response to inorganic substance	0.00037435	GO:0009651	response to salt stress	0.0101337
	GO:0050896	response to stimulus	6.01e-07	GO:0050896	response to stimulus	6.65e-06	GO:0009058	biosynthetic process	0.000390527	GO:0005975	carbohydrate metabolic process	0.010586
	GO:0009414	response to water deprivation	2.27e-06	GO:0009414	response to water deprivation	1.21e-05	GO:0009628	response to abiotic stimulus	0.00078477	GO:0005984	disaccharide metabolic process	0.0140192
	GO:1901564	organonitrogen compound metabolic process	4.08e-05	GO:0010035	response to inorganic substance	2.46e-05	GO:0050896	response to stimulus	0.0033137	GO:0006811	ion transport	0.0192957
	GO:0001101	response to acid chemical	5.21e-05	GO:0009737	response to abscisic acid	4.42e-05	GO:1901700	response to oxygen-containing compound	0.00416433	GO:0006970	response to osmotic stress	0.0195302
	GO:0006811	ion transport	0.00039649	GO:0042221	response to chemical	4.69e-05	GO:0009415	response to water	0.0122531	GO:0055114	oxidation-reduction process	0.0221203
	GO:0006970	response to osmotic stress	0.000623849	GO:0033993	response to lipid	0.000113899	GO:0006807	nitrogen compound metabolic process	0.0130331	GO:0009628	response to abiotic stimulus	0.0238415
ME4	GO:1901700	response to oxygen-containing compound	2.08e-11	GO:0006457	protein folding	8.1e-09	GO:0006811	ion transport	0.00140795	GO:1901700	response to oxygen-containing compound	1.31e-07
	GO:0044711	single-organism biosynthetic process	2.46e-10	GO:0009408	response to heat	1.79e-07	GO:0051179	localization	0.00151987	GO:0010035	response to inorganic substance	8.26e-07
	GO:0044765	single-organism transport	6.35e-10	GO:0009628	response to abiotic stimulus	1.99e-06	GO:0006810	transport	0.00231482	GO:0044281	small molecule metabolic process	1.24e-05
	GO:0051234	establishment of localization	1.1e-09	GO:0044255	cellular lipid metabolic process	3.13e-06	GO:0071705	nitrogen compound transport	0.00308427	GO:0001101	response to acid chemical	1.93e-05
	GO:0009628	response to abiotic stimulus	1.75e-09	GO:0050896	response to stimulus	5.06e-06	GO:0008150	biological_process	0.00617647	GO:0043436	oxoacid metabolic process	3.37e-05
	GO:0051179	localization	2.12e-09	GO:1901700	response to oxygen-containing compound	7.77e-06	GO:0009808	lignin metabolic process	0.00759076	GO:0006082	organic acid metabolic process	3.42e-05
	GO:0010035	response to inorganic substance	2.65e-09	GO:0006720	isoprenoid metabolic process	2.66e-05	GO:1901564	organonitrogen compound metabolic process	0.00775209	GO:0055114	oxidation-reduction process	3.81e-05
	GO:0006720	isoprenoid metabolic process	5.82e-09	GO:0008610	lipid biosynthetic process	2.84e-05	GO:0016051	carbohydrate biosynthetic process	0.0104446	GO:0006457	protein folding	5.54e-05
	GO:0009605	response to external stimulus	7.01e-09	GO:0009266	response to temperature stimulus	3e-05	GO:0005976	polysaccharide metabolic process	0.012286	GO:0009414	response to water deprivation	0.000172088
	GO:0042221	response to chemical	1.34e-08	GO:0006950	response to stress	9.2e-05	GO:0005975	carbohydrate metabolic process	0.0173992	GO:0009628	response to abiotic stimulus	0.000200707
ME5	GO:0044281	small molecule metabolic process	2.1e-05	GO:0044281	small molecule metabolic process	2.82e-05	GO:0015979	photosynthesis	0.00193841	GO:0055114	oxidation-reduction process	0.00463965
	GO:0015979	photosynthesis	7.53e-05	GO:0044283	small molecule biosynthetic process	0.000136412	GO:0006811	ion transport	0.00480513	GO:0071705	nitrogen compound transport	0.00500674
	GO:0042440	pigment metabolic process	0.000119626	GO:0051186	cofactor metabolic process	0.000356732	GO:0071705	nitrogen compound transport	0.0100651	GO:0042440	pigment metabolic process	0.00712178
	GO:0051234	establishment of localization	0.000142894	GO:0043436	oxoacid metabolic process	0.000732272	GO:0006810	transport	0.0147726	GO:0044699	single-organism process	0.013598
	GO:0051179	localization	0.000233446	GO:0006082	organic acid metabolic process	0.000737966	GO:0006091	generation of precursor metabolites and energy	0.0170897	GO:0009813	flavonoid biosynthetic process	0.0148592
	GO:0046148	pigment biosynthetic process	0.000265879	GO:0005976	polysaccharide metabolic process	0.000791365	GO:0048878	chemical homeostasis	0.0177442	GO:0009812	flavonoid metabolic process	0.0230037
	GO:0006811	ion transport	0.000435427	GO:0019684	photosynthesis, light reaction	0.000837144	GO:0006778	porphyrin-containing compound metabolic process	0.0219308	GO:0046148	pigment biosynthetic process	0.0237057
	GO:0051186	cofactor metabolic process	0.000786175	GO:0044255	cellular lipid metabolic process	0.00103463	GO:0042440	pigment metabolic process	0.0243842	GO:0019439	aromatic compound catabolic process	0.0274869
	GO:0071705	nitrogen compound transport	0.00136602	GO:1901135	carbohydrate derivative metabolic process	0.00125932	GO:1901135	carbohydrate derivative metabolic process	0.0256659	GO:0002252	immune effector process	0.0406127
	GO:0006091	generation of precursor metabolites and energy	0.00169238	GO:0034637	cellular carbohydrate biosynthetic process	0.00142828	GO:0033013	tetrapyrrole metabolic process	0.0262474	GO:0071310	cellular response to organic substance	0.0426671
ME6	GO:0005991	trehalose metabolic process	0.000125179	GO:0006811	ion transport	0.00158457	GO:0055114	oxidation-reduction process	2.78e-05	GO:0044550	secondary metabolite biosynthetic process	0.022605
	GO:0042440	pigment metabolic process	0.000220176	GO:0006520	cellular amino acid metabolic process	0.00280015	GO:0009414	response to water deprivation	0.00151909	GO:0009808	lignin metabolic process	0.0265164
	GO:0005984	disaccharide metabolic process	0.000236077	GO:0043436	oxoacid metabolic process	0.00479422	GO:0009415	response to water	0.00180646	GO:0009699	phenylpropanoid biosynthetic process	0.0418716
	GO:0055114	oxidation-reduction process	0.000391007	GO:0006082	organic acid metabolic process	0.00482408	GO:0071214	cellular response to abiotic stimulus	0.00206661
	GO:0006778	porphyrin-containing compound metabolic process	0.000468693	GO:1901605	alpha-amino acid metabolic process	0.00826984	GO:1901700	response to oxygen-containing compound	0.00392743
	GO:0046351	disaccharide biosynthetic process	0.00050952	GO:0006793	phosphorus metabolic process	0.0110413	GO:0042221	response to chemical	0.0099635
	GO:0044711	single-organism biosynthetic process	0.000532353	GO:0009651	response to salt stress	0.0141924	GO:0042440	pigment metabolic process	0.0127352
	GO:0009311	oligosaccharide metabolic process	0.00054415	GO:0015979	photosynthesis	0.0158799	GO:0010035	response to inorganic substance	0.0142292
	GO:0046148	pigment biosynthetic process	0.000573024	GO:0009751	response to salicylic acid	0.0186219	GO:0001666	response to hypoxia	0.0142357
	GO:0033013	tetrapyrrole metabolic process	0.000702955	GO:0006970	response to osmotic stress	0.020207
ME7	GO:0015979	photosynthesis	5.33e-07	GO:0043436	oxoacid metabolic process	1.68e-08	GO:0006457	protein folding	0.000301984	GO:0009266	response to temperature stimulus	0.00315215
	GO:0043436	oxoacid metabolic process	1.45e-06	GO:0006082	organic acid metabolic process	1.7e-08	GO:0046148	pigment biosynthetic process	0.000965194	GO:0009408	response to heat	0.0056518
	GO:0006082	organic acid metabolic process	1.48e-06	GO:0044281	small molecule metabolic process	9.88e-07	GO:0009058	biosynthetic process	0.00184096	GO:0015979	photosynthesis	0.0135101
	GO:0044281	small molecule metabolic process	1.58e-06	GO:1901576	organic substance biosynthetic process	1.46e-06	GO:1901576	organic substance biosynthetic process	0.00187061	GO:0019684	photosynthesis, light reaction	0.0290645
	GO:0006457	protein folding	2e-06	GO:0006457	protein folding	8.92e-06	GO:0008610	lipid biosynthetic process	0.00209694	GO:0010033	response to organic substance	0.0378411
	GO:0005984	disaccharide metabolic process	3.9e-06	GO:1901135	carbohydrate derivative metabolic process	5.09e-05	GO:0019684	photosynthesis, light reaction	0.0027602	GO:0009606	tropism	0.0408362
	GO:0044249	cellular biosynthetic process	8.65e-06	GO:0022900	electron transport chain	7.68e-05	GO:0042440	pigment metabolic process	0.00283405	GO:0055082	cellular chemical homeostasis	0.0424894
	GO:1901576	organic substance biosynthetic process	1.03e-05	GO:0044283	small molecule biosynthetic process	0.000158789	GO:0015979	photosynthesis	0.00319909	GO:0016053	organic acid biosynthetic process	0.0473554
	GO:0009311	oligosaccharide metabolic process	1.15e-05	GO:0016053	organic acid biosynthetic process	0.000170885	GO:0005984	disaccharide metabolic process	0.0034802	GO:0019725	cellular homeostasis	0.047703
	GO:0046148	pigment biosynthetic process	1.23e-05	GO:0015979	photosynthesis	0.000226786	GO:0044765	single-organism transport	0.00394021	GO:0009628	response to abiotic stimulus	0.0494245
ME8	GO:0007165	signal transduction	0.000759178	GO:0007165	signal transduction	0.00708972	GO:0009751	response to salicylic acid	0.00599812	GO:0005976	polysaccharide metabolic process	0.00222812
	GO:0009414	response to water deprivation	0.0030291	GO:0023052	signaling	0.00775806	GO:0048583	regulation of response to stimulus	0.00772149	GO:0034637	cellular carbohydrate biosynthetic process	0.00465194
	GO:2000026	regulation of multicellular organismal development	0.00458773	GO:0007154	cell communication	0.0157652	GO:0080134	regulation of response to stress	0.0104812	GO:0050896	response to stimulus	0.00619946
	GO:0050896	response to stimulus	0.00464156	GO:0051716	cellular response to stimulus	0.0404404	GO:0071229	cellular response to acid chemical	0.0136442	GO:0016051	carbohydrate biosynthetic process	0.00999927
	GO:0007154	cell communication	0.00492959				GO:0044710	single-organism metabolic process	0.0174411	GO:0044723	single-organism carbohydrate metabolic process	0.0114486
	GO:0051239	regulation of multicellular organismal process	0.00703377							GO:0007165	signal transduction	0.0190264
	GO:0006811	ion transport	0.0103038							GO:0044262	cellular carbohydrate metabolic process	0.0198809
	GO:0010035	response to inorganic substance	0.011705							GO:0023052	signaling	0.0222832
	GO:0001101	response to acid chemical	0.0136622							GO:0009266	response to temperature stimulus	0.0400299
	GO:0071705	nitrogen compound transport	0.0137177							GO:0010035	response to inorganic substance	0.0434056
ME9	GO:0016053	organic acid biosynthetic process	1.27e-09	GO:0016053	organic acid biosynthetic process	0.00522277	GO:0006811	ion transport	0.00878046	GO:0015979	photosynthesis	2.33e-05
	GO:0044283	small molecule biosynthetic process	2e-07	GO:0019684	photosynthesis, light reaction	0.00655085	GO:0044699	single-organism process	0.0122615	GO:0019684	photosynthesis, light reaction	6.09e-05
	GO:0043436	oxoacid metabolic process	6.06e-06	GO:0009886	post-embryonic morphogenesis	0.00951683	GO:0010228	vegetative to reproductive phase transition of meristem	0.0317646	GO:0006778	porphyrin-containing compound metabolic process	0.000160621
	GO:0044281	small molecule metabolic process	0.00014707	GO:0044283	small molecule biosynthetic process	0.0114085	GO:0016053	organic acid biosynthetic process	0.0324058	GO:0033013	tetrapyrrole metabolic process	0.000199023
	GO:0006631	fatty acid metabolic process	0.000163969	GO:0015979	photosynthesis	0.0121566	GO:0044765	single-organism transport	0.0407325	GO:0010033	response to organic substance	0.000471441
	GO:0046148	pigment biosynthetic process	0.000274326	GO:0009653	anatomical structure morphogenesis	0.0149196	GO:1902578	single-organism localization	0.0443583	GO:0009725	response to hormone	0.00072876
	GO:0015979	photosynthesis	0.000304028	GO:1901605	alpha-amino acid metabolic process	0.0198132				GO:0042440	pigment metabolic process	0.000827064
	GO:0010166	wax metabolic process	0.000411108	GO:0006091	generation of precursor metabolites and energy	0.0246				GO:0006091	generation of precursor metabolites and energy	0.00148051
	GO:1901605	alpha-amino acid metabolic process	0.000476691	GO:0043436	oxoacid metabolic process	0.0408401				GO:0042221	response to chemical	0.00181221
	GO:0006778	porphyrin-containing compound metabolic process	0.000531904	GO:0006082	organic acid metabolic process	0.0409265				GO:0006810	transport	0.00183442
ME10	GO:0046148	pigment biosynthetic process	0.00643541				GO:0006629	lipid metabolic process	0.00582342
	GO:0008152	metabolic process	0.0131002				GO:0015979	photosynthesis	0.0124151
	GO:0042440	pigment metabolic process	0.0151659				GO:0046148	pigment biosynthetic process	0.0158867
	GO:0006631	fatty acid metabolic process	0.0255301				GO:0006631	fatty acid metabolic process	0.0187137
							GO:0071704	organic substance metabolic process	0.0205487
							GO:0044238	primary metabolic process	0.0230155
							GO:0043094	cellular metabolic compound salvage	0.0265895
							GO:0019684	photosynthesis, light reaction	0.0272577
							GO:0042440	pigment metabolic process	0.0276322
							GO:0019438	aromatic compound biosynthetic process	0.0277522
ME11	GO:0006811	ion transport	0.0252218	GO:0036211	protein modification process	0.0110636	GO:0006796	phosphate-containing compound metabolic process	0.00197122	GO:0071702	organic substance transport	0.0219976
	GO:0006810	transport	0.0428438	GO:0009737	response to abscisic acid	0.0121138	GO:0006793	phosphorus metabolic process	0.00225526	GO:0044765	single-organism transport	0.0251133
	GO:0051234	establishment of localization	0.0457277	GO:1901700	response to oxygen-containing compound	0.0123882	GO:0036211	protein modification process	0.0072657	GO:1902578	single-organism localization	0.0262999
	GO:0009605	response to external stimulus	0.0472137	GO:0006796	phosphate-containing compound metabolic process	0.0129772	GO:0043412	macromolecule modification	0.016674
	GO:0051179	localization	0.0497153	GO:0006793	phosphorus metabolic process	0.0135388	GO:0008152	metabolic process	0.0173415
				GO:0043412	macromolecule modification	0.0152538	GO:0019538	protein metabolic process	0.0237676
				GO:0010033	response to organic substance	0.0158024	GO:0044267	cellular protein metabolic process	0.047757
				GO:0033993	response to lipid	0.0180117
				GO:0044267	cellular protein metabolic process	0.0307974
				GO:0006811	ion transport	0.0388572
ME12	GO:0051239	regulation of multicellular organismal process	0.00222089							GO:2000026	regulation of multicellular organismal development	0.00202849
	GO:0050793	regulation of developmental process	0.00439258							GO:0051239	regulation of multicellular organismal process	0.00261611
	GO:0009605	response to external stimulus	0.00578446							GO:0050793	regulation of developmental process	0.00422762
	GO:0044238	primary metabolic process	0.0083582							GO:0009791	post-embryonic development	0.0169548
	GO:0005991	trehalose metabolic process	0.0103181							GO:0048827	phyllome development	0.0202768
	GO:0043207	response to external biotic stimulus	0.0111316							GO:0044238	primary metabolic process	0.0231182
	GO:0071704	organic substance metabolic process	0.012995							GO:0044237	cellular metabolic process	0.0332119
	GO:0048827	phyllome development	0.0132299							GO:0043933	macromolecular complex subunit organization	0.0388313
										GO:0003006	developmental process involved in reproduction	0.0391925
										GO:0048731	system development	0.0394336
ME13	GO:0055114	oxidation-reduction process	0.00267758				GO:0055114	oxidation-reduction process	0.00121232
	GO:0071705	nitrogen compound transport	0.0158383				GO:0071702	organic substance transport	0.0127258
	GO:0009755	hormone-mediated signaling pathway	0.0169965				GO:0099402	plant organ development	0.0135986
	GO:0032870	cellular response to hormone stimulus	0.0263789				GO:0048523	negative regulation of cellular process	0.0159355
	GO:0071495	cellular response to endogenous stimulus	0.0279898				GO:0048513	animal organ development	0.017479
	GO:0071702	organic substance transport	0.0451162				GO:0050896	response to stimulus	0.0188522
							GO:0048367	shoot system development	0.0233956
							GO:0048827	phyllome development	0.02422
							GO:0006810	transport	0.0323752
							GO:0009966	regulation of signal transduction	0.0368902
ME14	GO:0048646	anatomical structure formation involved in morphogenesis	0.00914247				GO:0048827	phyllome development	0.0463846	GO:0010038	response to metal ion	0.028795
	GO:0006631	fatty acid metabolic process	0.011377							GO:0050896	response to stimulus	0.0441995
	GO:0008610	lipid biosynthetic process	0.0231146							GO:0006811	ion transport	0.046503
ME15	GO:0023057	negative regulation of signaling	0.0104576
	GO:1901419	regulation of response to alcohol	0.0128542
	GO:0006325	chromatin organization	0.0440386
ME16	GO:0009408	response to heat	0.000697379	GO:0009628	response to abiotic stimulus	0.00607971	GO:0006457	protein folding	0.0114482	GO:0009605	response to external stimulus	0.0114011
	GO:0010035	response to inorganic substance	0.00158172	GO:0050896	response to stimulus	0.0373808	GO:0006796	phosphate-containing compound metabolic process	0.0166369	GO:0009737	response to abscisic acid	0.0146388
	GO:0009628	response to abiotic stimulus	0.00334589				GO:0006793	phosphorus metabolic process	0.01799	GO:0044710	single-organism metabolic process	0.0150002
	GO:0006950	response to stress	0.00486461				GO:0055114	oxidation-reduction process	0.0267881	GO:0051704	multi-organism process	0.0168458
	GO:0042221	response to chemical	0.0055718				GO:0006950	response to stress	0.044426	GO:0033993	response to lipid	0.0217089
	GO:0050896	response to stimulus	0.00739433
	GO:0006457	protein folding	0.00839281
	GO:0009605	response to external stimulus	0.00963659
	GO:0009651	response to salt stress	0.0107332
	GO:0006970	response to osmotic stress	0.0154008
ME17	GO:0006720	isoprenoid metabolic process	0.012473				GO:0006720	isoprenoid metabolic process	0.00508206	GO:1901700	response to oxygen-containing compound	0.0459745
	GO:0006091	generation of precursor metabolites and energy	0.0337181				GO:0046148	pigment biosynthetic process	0.015937
	GO:0022900	electron transport chain	0.0457987				GO:0042440	pigment metabolic process	0.0237343
ME18	GO:0009628	response to abiotic stimulus	0.01608				GO:1901700	response to oxygen-containing compound	0.0130343
	GO:0055082	cellular chemical homeostasis	0.0180684				GO:0050794	regulation of cellular process	0.0205967
	GO:1901700	response to oxygen-containing compound	0.0457881				GO:0065007	biological regulation	0.0334541
ME19	GO:0009966	regulation of signal transduction	0.0110295				GO:0009966	regulation of signal transduction	0.00280404	GO:0006325	chromatin organization	0.000888303
	GO:0023051	regulation of signaling	0.0113802				GO:0023051	regulation of signaling	0.00289569
	GO:0010646	regulation of cell communication	0.0122782				GO:0010646	regulation of cell communication	0.00313096
	GO:0033993	response to lipid	0.0251205				GO:0009414	response to water deprivation	0.0121566
	GO:0010035	response to inorganic substance	0.033125				GO:0009415	response to water	0.0129769
	GO:0010038	response to metal ion	0.0369615				GO:0071705	nitrogen compound transport	0.013537
	GO:0009414	response to water deprivation	0.0450882				GO:0048583	regulation of response to stimulus	0.0180667
	GO:0009415	response to water	0.047947				GO:0009737	response to abscisic acid	0.0267119
	GO:0071705	nitrogen compound transport	0.0498894				GO:0033993	response to lipid	0.0392027
ME20	GO:0033013	tetrapyrrole metabolic process	5.59e-05				GO:0034637	cellular carbohydrate biosynthetic process	0.000661997	GO:0006629	lipid metabolic process	0.0326547
	GO:0009058	biosynthetic process	0.000210197				GO:1901135	carbohydrate derivative metabolic process	0.000887195
	GO:1901576	organic substance biosynthetic process	0.00039806				GO:0044249	cellular biosynthetic process	0.000910282
	GO:1901135	carbohydrate derivative metabolic process	0.00182432				GO:1901576	organic substance biosynthetic process	0.00102478
	GO:1901566	organonitrogen compound biosynthetic process	0.002557				GO:0016051	carbohydrate biosynthetic process	0.00113441
	GO:0005976	polysaccharide metabolic process	0.00343776				GO:0005976	polysaccharide metabolic process	0.00121422
	GO:1901564	organonitrogen compound metabolic process	0.00519422				GO:0009058	biosynthetic process	0.00152231
	GO:0034641	cellular nitrogen compound metabolic process	0.00565569				GO:1901137	carbohydrate derivative biosynthetic process	0.00156888
	GO:0006725	cellular aromatic compound metabolic process	0.00745261				GO:0044262	cellular carbohydrate metabolic process	0.0018737
	GO:1901360	organic cyclic compound metabolic process	0.00994152				GO:0033013	tetrapyrrole metabolic process	0.00237914
ME21
ME22	GO:0046351	disaccharide biosynthetic process	0.000654707							GO:0051171	regulation of nitrogen compound metabolic process	0.000815651
	GO:0051171	regulation of nitrogen compound metabolic process	0.00808025							GO:0009889	regulation of biosynthetic process	0.000857302
	GO:0009889	regulation of biosynthetic process	0.00850902							GO:0050794	regulation of cellular process	0.00112363
	GO:0005984	disaccharide metabolic process	0.00894768							GO:0080090	regulation of primary metabolic process	0.00124565
	GO:0009311	oligosaccharide metabolic process	0.0109331							GO:0060255	regulation of macromolecule metabolic process	0.00126056
	GO:0080090	regulation of primary metabolic process	0.0125007							GO:0031323	regulation of cellular metabolic process	0.00128165
	GO:0060255	regulation of macromolecule metabolic process	0.0126535							GO:0019222	regulation of metabolic process	0.00265423
	GO:0071310	cellular response to organic substance	0.0129957							GO:0065007	biological regulation	0.00463293
	GO:0050789	regulation of biological process	0.0211322							GO:0071310	cellular response to organic substance	0.0208733
	GO:0050896	response to stimulus	0.0295491							GO:0070887	cellular response to chemical stimulus	0.0280393
