# Supplementary material for: Comparative Transcriptome Analysis of Two Sweet Sorghum Genotypes with Different Salt Tolerance Abilities to Reveal the Mechanism of Salt Tolerance
Source: Int J Mol Sci. 2022 Feb 18;23(4):2272. doi: 10.3390/ijms23042272 (PMC8877675; doi:10.3390/ijms23042272)
Supplement: Supplementary file 1 [file ijms-23-02272-s001.zip › TableS3-secondary.xlsx]

## Sheet: secondary.cat
Table S3 Differentially expression genes involve in secondary metabolic process.
Gene	Module	Log2 (FC) in RIO-1h	Log2 (FC) in RIO-2h	Log2 (FC) in RIO-6h	Log2 (FC) in RIO-12h	Log2 (FC) in RIO-24h	Log2 (FC) in SN005-1h	Log2 (FC) in SN005-2h	Log2 (FC) in SN005-6h	Log2 (FC) in SN005-12h	Log2 (FC) in SN005-24h	Swissprot_annotation	Homologous in Arabidopsis thaliana			Homologous in Oryza sativa
Sobic.001G012300	ME1	--	--	--	--	-1.96524	--	1.03744	--	--	-2.54272	Tyrosine N-monooxygenase GN=CYP79A1 OS=Sorghum bicolor (Sorghum) PE=1 SV=3	AT4G39950.1	CYP79B2	cytochrome P450, family 79, subfamily B, polypeptide 2	LOC_Os03g37290.1	cytochrome P450, putative, expressed
Sobic.001G213300	ME1	1.03134	--	--	-1.66406	--	--	--	--	--	--	Cytochrome P450 86B1 GN=CYP86B1 OS=Arabidopsis thaliana (Mouse-ear cress) PE=2 SV=1	AT5G23190.1	CYP86B1	cytochrome P450, family 86, subfamily B, polypeptide 1	LOC_Os10g34480.1	cytochrome P450, putative, expressed
Sobic.001G250200	ME1	--	--	-1.76997	--	--	--	--	-1.84344	--	-1.54094	Glycerol-3-phosphate 2-O-acyltransferase 6 GN=GPAT6 OS=Arabidopsis thaliana (Mouse-ear cress) PE=1 SV=1	AT2G38110.1	ATGPAT6,GPAT6	glycerol-3-phosphate acyltransferase 6	LOC_Os10g27330.1	glycerol-3-phosphate acyltransferase, putative, expressed
Sobic.001G514300	ME1	--	--	--	--	--	--	--	-1.5233	-1.10936	-2.57075	Glutathione S-transferase F8, chloroplastic (Precursor) GN=F17A22.12 OS=Arabidopsis thaliana (Mouse-ear cress) PE=2 SV=3	AT2G47730.1	ATGSTF5,ATGSTF8,GST6,GSTF8	glutathione S-transferase phi 8	LOC_Os03g04240.1	glutathione S-transferase, putative, expressed
Sobic.002G082000	ME1	--	--	--	1.4493	--	--	--	--	--	--	Nitrile-specifier protein 5 GN=NSP5 OS=Arabidopsis thaliana (Mouse-ear cress) PE=2 SV=1	AT3G07720.1	--	Galactose oxidase/kelch repeat superfamily protein	LOC_Os09g07460.1	kelch repeat protein, putative, expressed
Sobic.002G126600	ME1	1.04908	--	-2.3293	-1.61887	--	--	--	-1.9386	-1.52138	--	Trans-cinnamate 4-monooxygenase GN=CYP73A14 OS=Glycyrrhiza echinata (Licorice) PE=2 SV=1	AT2G30490.1	ATC4H,C4H,CYP73A5,REF3	cinnamate-4-hydroxylase	LOC_Os05g25640.1	cytochrome P450, putative, expressed
Sobic.002G146000	ME1	--	--	--	--	--	--	--	--	--	-1.66864	Cinnamoyl-CoA reductase 1 GN=T24D18.5 OS=Arabidopsis thaliana (Mouse-ear cress) PE=1 SV=1	AT1G15950.1	ATCCR1,CCR1,IRX4	cinnamoyl coa reductase 1	LOC_Os09g04050.1	dehydrogenase, putative, expressed
Sobic.003G045900	ME1	3.6761	3.73849	--	--	--	2.30318	2.19538	--	--	-3.67772	Gibberellin 3-beta-dioxygenase 2-2 GN=GA3ox2-2 OS=Triticum aestivum (Wheat) PE=2 SV=1	AT1G15550.1	ATGA3OX1,GA3OX1,GA4	gibberellin 3-oxidase 1	LOC_Os01g08220.1	gibberellin 3-beta-dioxygenase 2-2, putative, expressed
Sobic.003G047700	ME1	--	--	-2.23841	-1.65468	--	--	--	-2.8892	-2.11374	--	UDP-glycosyltransferase 73C5 GN=F13K3.20 OS=Arabidopsis thaliana (Mouse-ear cress) PE=2 SV=1	AT2G36800.1	DOGT1,UGT73C5	don-glucosyltransferase 1	LOC_Os10g09990.1	cytokinin-O-glucosyltransferase 3, putative, expressed
Sobic.003G082800	ME1	--	--	--	--	--	--	--	--	-1.3862	--	Shikimate O-hydroxycinnamoyltransferase GN=K19E20.4 OS=Arabidopsis thaliana (Mouse-ear cress) PE=2 SV=1	AT5G48930.1	HCT	hydroxycinnamoyl-CoA shikimate/quinate hydroxycinnamoyl transferase	LOC_Os08g43040.1	transferase family protein, putative, expressed
Sobic.003G203500	ME1	--	--	-2.10317	--	--	--	--	--	--	--	Aldehyde dehydrogenase family 2 member C4 GN=MOB24.3 OS=Arabidopsis thaliana (Mouse-ear cress) PE=1 SV=2	AT3G24503.1	ALDH1A,ALDH2C4,REF1	aldehyde dehydrogenase 2C4	LOC_Os01g40860.1	aldehyde dehydrogenase, putative, expressed
Sobic.003G327800	ME1	2.05182	1.95068	-1.64771	--	--	1.7041	1.26553	-1.98765	-1.648	--	Cytochrome P450 98A1 GN=CYP98A1 OS=Sorghum bicolor (Sorghum) PE=2 SV=1	AT2G40890.1	CYP98A3	cytochrome P450, family 98, subfamily A, polypeptide 3	LOC_Os05g41440.1	cytochrome P450, putative, expressed
Sobic.003G341500	ME1	--	--	-1.62258	-1.84147	--	--	--	--	--	--	Laccase-3 (Precursor) GN=B1088C09.5 OS=Oryza sativa subsp. japonica (Rice) PE=2 SV=1	AT2G40370.1	LAC5	laccase 5	LOC_Os01g61160.1	laccase precursor protein, putative, expressed
Sobic.003G352700	ME1	--	--	-1.56279	-1.85299	--	--	--	--	-1.16935	-2.02373	Laccase-4 (Precursor) OS=Oryza sativa subsp. japonica (Rice) PE=2 SV=1	AT5G60020.1	ATLAC17,LAC17	laccase 17	LOC_Os01g62480.1	laccase precursor protein, putative, expressed
Sobic.004G171400	ME1	1.12881	--	--	--	--	--	--	--	--	--	Probable glutathione S-transferase GSTF1 OS=Oryza sativa subsp. japonica (Rice) PE=1 SV=2	AT3G62760.1	ATGSTF13	Glutathione S-transferase family protein	LOC_Os01g27360.1	glutathione S-transferase, putative, expressed
Sobic.004G220700	ME1	3.42799	2.63268	-1.85653	-2.29904	--	2.77991	2.28125	--	-2.93234	--	Phenylalanine ammonia-lyase GN=ZB8 OS=Oryza sativa subsp. indica (Rice) PE=2 SV=1	AT2G37040.1	ATPAL1,PAL1	PHE ammonia lyase 1	LOC_Os02g41680.1	phenylalanine ammonia-lyase, putative, expressed
Sobic.004G272700	ME1	1.84717	2.07476	--	--	--	1.34278	--	--	--	--	Probable 4-coumarate--CoA ligase 2 OS=Oryza sativa subsp. japonica (Rice) PE=2 SV=2	AT1G65060.1	4CL3	4-coumarate:CoA ligase 3	LOC_Os02g46970.1	AMP-binding domain containing protein, expressed
Sobic.004G328700	ME1	--	--	-2.05214	-2.38678	-1.3063	--	--	--	-2.10222	-1.65008	Shikimate O-hydroxycinnamoyltransferase GN=HST OS=Nicotiana tabacum (Common tobacco) PE=1 SV=1	AT5G48930.1	HCT	hydroxycinnamoyl-CoA shikimate/quinate hydroxycinnamoyl transferase	LOC_Os06g08580.1	transferase family protein, putative, expressed
Sobic.005G105850	ME1	--	--	-1.54797	--	-1.75627	--	--	--	--	-3.33015	Serine carboxypeptidase-like 6 (Precursor) GN=SCPL6 OS=Arabidopsis thaliana (Mouse-ear cress) PE=2 SV=2	AT5G09640.1	SCPL19,SNG2	serine carboxypeptidase-like 19	LOC_Os11g27329.1	OsSCP62 - Putative Serine Carboxypeptidase homologue, expressed
Sobic.006G170800	ME1	--	--	--	--	--	--	--	-1.73045	--	-1.57141	Malate dehydrogenase, cytoplasmic GN=OSJNBa0055P24.3 OS=Oryza sativa subsp. japonica (Rice) PE=1 SV=3	AT5G43330.1	--	Lactate/malate dehydrogenase family protein	LOC_Os04g46560.1	lactate/malate dehydrogenase, putative, expressed
Sobic.006G211000	ME1	--	--	-1.74323	-1.39593	--	--	--	-1.49645	--	--	Shikimate O-hydroxycinnamoyltransferase GN=K19E20.4 OS=Arabidopsis thaliana (Mouse-ear cress) PE=2 SV=1	AT3G23840.1	--	HXXXD-type acyl-transferase family protein	LOC_Os04g52164.1	transferase family protein, putative, expressed
Sobic.007G088000	ME1	1.61886	1.60069	--	--	--	--	--	-1.36171	-1.0898	--	NADPH--cytochrome P450 reductase GN=CPR OS=Catharanthus roseus (Madagascar periwinkle) PE=2 SV=1	AT4G30210.2	AR2,ATR2	P450 reductase 2	LOC_Os08g14570.1	NADPH reductase, putative, expressed
Sobic.007G111700	ME1	--	--	--	--	--	--	--	--	--	-1.7022	Glutathione S-transferase F10 GN=F7F1.8 OS=Arabidopsis thaliana (Mouse-ear cress) PE=1 SV=3	AT3G03190.1	ATGSTF11,ATGSTF6,GSTF11	glutathione S-transferase F11	LOC_Os08g43680.1	glutathione S-transferase, C-terminal domain containing protein, expressed
Sobic.008G180800	ME1	1.17685	--	-3.83622	-2.6794	--	1.10364	--	-3.86733	-2.93319	--	Phytoene synthase, chloroplastic (Precursor) GN=PSY OS=Daucus carota (Carrot) PE=2 SV=1	AT5G17230.1	PSY	PHYTOENE SYNTHASE	LOC_Os12g43130.1	phytoene synthase, chloroplast precursor, putative, expressed
Sobic.009G069600	ME1	--	--	-1.75864	-2.03612	--	1.05978	--	--	-1.45939	--	NADP-dependent malic enzyme, chloroplastic (Precursor) OS=Oryza sativa subsp. japonica (Rice) PE=2 SV=2	AT5G25880.1	ATNADP-ME3,NADP-ME3	NADP-malic enzyme 3	LOC_Os05g09440.1	NADP-dependent malic enzyme, chloroplast precursor, putative, expressed
Sobic.009G135500	ME1	--	--	-1.68325	-2.70842	--	--	--	--	-2.20143	--	1-deoxy-D-xylulose-5-phosphate synthase 1, chloroplastic (Precursor) OS=Oryza sativa subsp. japonica (Rice) PE=2 SV=2	AT4G15560.1	CLA,CLA1,DEF,DXPS2,DXS	Deoxyxylulose-5-phosphate synthase	LOC_Os05g33840.1	transketolase, putative, expressed
Sobic.009G162300	ME1	1.17333	--	-1.48095	-2.10852	--	--	--	--	-1.15293	-1.7108	Putative laccase-11 GN=OsJ_018044 OS=Oryza sativa subsp. japonica (Rice) PE=5 SV=2	AT5G60020.1	ATLAC17,LAC17	laccase 17	LOC_Os05g38390.1	laccase precursor protein, putative, expressed
Sobic.009G162800	ME1	--	--	-2.58815	-2.76437	--	--	--	-1.68091	-1.65722	--	Laccase-12/13 (Precursor) GN=OJ1362_D02.10 OS=Oryza sativa subsp. japonica (Rice) PE=2 SV=1	AT5G60020.1	ATLAC17,LAC17	laccase 17	LOC_Os05g38420.1	laccase precursor protein, putative, expressed
Sobic.009G196300	ME1	1.33531	--	-1.52592	-1.79109	-2.14913	--	--	--	-2.46086	-2.54751	Gibberellin 2-beta-dioxygenase GN=GA2OX1 OS=Phaseolus coccineus (Scarlet runner bean) PE=2 SV=1	AT1G30040.1	ATGA2OX2,GA2OX2	gibberellin 2-oxidase	LOC_Os01g55240.1	gibberellin 2-beta-dioxygenase, putative, expressed
Sobic.010G007700	ME1	1.88416	1.46546	-1.46434	-1.8534	--	--	--	--	-2.12755	--	Cytochrome P450 88A1 GN=CYP88A1 OS=Zea mays (Maize) PE=2 SV=1	AT2G32440.1	ATKAO2,CYP88A4,KAO2	ent-kaurenoic acid hydroxylase 2	LOC_Os06g02019.1	cytochrome P450, putative, expressed
Sobic.010G024000	ME1	--	--	--	--	--	--	--	--	--	-1.91029	Transketolase, chloroplastic OS=Zea mays (Maize) PE=1 SV=1	AT3G60750.2	--	Transketolase	LOC_Os06g04270.1	transketolase, chloroplast precursor, putative, expressed
Sobic.001G339100	ME2	--	--	1.70455	--	--	--	--	1.6398	--	--	Glucose-6-phosphate 1-dehydrogenase, chloroplastic (Precursor) OS=Solanum tuberosum (Potato) PE=1 SV=1	AT5G13110.1	G6PD2	glucose-6-phosphate dehydrogenase 2	LOC_Os03g29950.1	glucose-6-phosphate 1-dehydrogenase, chloroplast precursor, putative, expressed
Sobic.002G045700	ME2	--	--	1.60499	--	-1.25451	--	--	--	--	--	Probable polyribonucleotide nucleotidyltransferase 1, chloroplastic (Precursor) GN=OSJNBa0050F10.4 OS=Oryza sativa subsp. japonica (Rice) PE=2 SV=1	AT3G03710.1	PNP,RIF10	polyribonucleotide nucleotidyltransferase, putative	LOC_Os07g07310.1	polynucleotide phosphorylase, putative, expressed
Sobic.002G250100	ME2	1.51154	--	2.57483	--	--	--	--	1.43358	--	--	Cinnamoyl-CoA reductase 1 GN=T24D18.5 OS=Arabidopsis thaliana (Mouse-ear cress) PE=1 SV=1	AT2G33590.1	--	NAD(P)-binding Rossmann-fold superfamily protein	LOC_Os09g31502.1	dehydrogenase, putative, expressed
Sobic.003G277400	ME2	--	--	1.68961	--	--	--	--	1.71347	--	--	Violaxanthin de-epoxidase, chloroplastic (Precursor) GN=VDE1 OS=Lactuca sativa (Garden lettuce) PE=1 SV=1	AT2G21860.1	--	violaxanthin de-epoxidase-related	LOC_Os01g51860.1	violaxanthin de-epoxidase, putative, expressed
Sobic.004G057900	ME2	--	--	2.32776	1.34801	--	--	--	2.13665	1.76191	--	Cytochrome P450 97B2, chloroplastic (Precursor) GN=CYP97B2 OS=Glycine max (Soybean) PE=2 SV=1	AT4G15110.1	CYP97B3	cytochrome P450, family 97, subfamily B, polypeptide 3	LOC_Os02g07680.1	cytochrome P450, putative, expressed
Sobic.004G201100	ME2	--	1.56161	3.66958	2.04592	1.68861	--	--	2.06086	1.5431	--	Flavonoid 3&apos;-monooxygenase GN=CYP75B2 OS=Petunia hybrida (Petunia) PE=2 SV=1	AT5G07990.1	CYP75B1,D501,TT7	Cytochrome P450 superfamily protein	LOC_Os10g17260.1	cytochrome P450, putative, expressed
Sobic.004G346000	ME2	--	--	1.91686	1.36327	--	--	--	--	--	--	Protein LUTEIN DEFICIENT 5, chloroplastic (Precursor) GN=F5M6.19 OS=Arabidopsis thaliana (Mouse-ear cress) PE=1 SV=1	AT1G31800.1	CYP97A3,LUT5	cytochrome P450, family 97, subfamily A, polypeptide 3	LOC_Os02g57290.1	cytochrome P450, putative, expressed
Sobic.005G136200	ME2	--	--	2.21016	--	--	--	--	--	--	--	Chalcone synthase 5 GN=CHS5 OS=Sorghum bicolor (Sorghum) PE=3 SV=1	AT5G13930.1	ATCHS,CHS,TT4	Chalcone and stilbene synthase family protein	LOC_Os11g32650.1	chalcone synthase, putative, expressed
Sobic.005G136300	ME2	--	3.62883	4.80401	2.72549	--	--	--	3.10457	1.96784	--	Chalcone synthase 4 GN=CHS4 OS=Sorghum bicolor (Sorghum) PE=3 SV=1	AT5G13930.1	ATCHS,CHS,TT4	Chalcone and stilbene synthase family protein	LOC_Os11g32650.1	chalcone synthase, putative, expressed
Sobic.005G137100	ME2	-3.0365	--	1.91521	-4.05737	-2.96004	--	--	--	--	--	Chalcone synthase 3 GN=CHS3 OS=Sorghum bicolor (Sorghum) PE=3 SV=1	AT5G13930.1	ATCHS,CHS,TT4	Chalcone and stilbene synthase family protein	LOC_Os11g32650.1	chalcone synthase, putative, expressed
Sobic.009G062800	ME2	--	2.39485	7.43479	2.87236	--	--	--	5.92712	2.76072	--	Transketolase, chloroplastic OS=Zea mays (Maize) PE=1 SV=1	AT3G60750.1	--	Transketolase	LOC_Os06g04270.1	transketolase, chloroplast precursor, putative, expressed
Sobic.001G002300	ME3	--	--	1.54745	1.4165	2.84199	--	--	--	--	-2.02629	Anthocyanidin 3-O-glucoside 6&apos;&apos;-O-acyltransferase (Fragment) OS=Perilla frutescens (Beefsteak mint) PE=1 SV=1	AT1G03940.1	--	HXXXD-type acyl-transferase family protein	LOC_Os02g28300.1	transferase family protein, putative, expressed
Sobic.001G447500	ME3	--	--	--	--	--	--	--	--	--	2.1421	Branched-chain-amino-acid aminotransferase 3, chloroplastic (Precursor) GN=BCAT3 OS=Arabidopsis thaliana (Mouse-ear cress) PE=1 SV=1	AT3G49680.1	ATBCAT-3,BCAT3	branched-chain aminotransferase 3	LOC_Os03g12890.2	aminotransferase domain containing protein, putative, expressed
Sobic.002G043500	ME3	--	--	--	1.38502	2.56821	--	--	--	1.29835	2.46132	Indole-3-acetaldehyde oxidase GN=AO2 OS=Zea mays (Maize) PE=2 SV=1	AT1G04580.1	AAO4,AO4,ATAO-4,ATAO2	aldehyde oxidase 4	LOC_Os03g57680.1	aldehyde oxidase, putative, expressed
Sobic.002G292600	ME3	--	--	--	--	1.77555	1.15656	1.05148	--	--	1.90635	Phytoene synthase, chloroplastic (Precursor) GN=PSY OS=Narcissus pseudonarcissus (Daffodil) PE=2 SV=1	AT5G17230.1	PSY	PHYTOENE SYNTHASE	LOC_Os09g38320.1	phytoene synthase, chloroplast precursor, putative, expressed
Sobic.007G044900	ME3	1.04266	--	--	--	1.69966	--	--	--	--	--	Flavonoid 3&apos;-monooxygenase GN=F13G24.190 OS=Arabidopsis thaliana (Mouse-ear cress) PE=1 SV=1	AT5G07990.1	CYP75B1,D501,TT7	Cytochrome P450 superfamily protein	LOC_Os02g29960.1	cytochrome P450, putative, expressed
Sobic.002G295100	ME4	--	--	-2.93693	-3.25107	--	--	--	-2.65992	-3.93142	--	NADPH--cytochrome P450 reductase GN=CPR OS=Catharanthus roseus (Madagascar periwinkle) PE=2 SV=1	AT4G30210.2	AR2,ATR2	P450 reductase 2	LOC_Os09g38620.1	NADPH reductase, putative, expressed
Sobic.003G337400	ME4	1.08102	--	-2.25073	-1.75454	1.14942	--	--	--	-1.6484	--	Trans-cinnamate 4-monooxygenase GN=CYP73A4 OS=Catharanthus roseus (Madagascar periwinkle) PE=2 SV=1	AT2G30490.1	ATC4H,C4H,CYP73A5,REF3	cinnamate-4-hydroxylase	LOC_Os01g60450.1	cytochrome P450, putative, expressed
Sobic.003G418000	ME4	--	--	--	-1.26253	--	--	--	--	--	--	Protein SRG1 GN=SRG1 OS=Arabidopsis thaliana (Mouse-ear cress) PE=2 SV=1	AT3G21420.1	--	2-oxoglutarate (2OG) and Fe(II)-dependent oxygenase superfamily protein	LOC_Os01g70930.1	leucoanthocyanidin dioxygenase, putative, expressed
Sobic.001G285400	ME5	--	--	--	--	--	--	--	-1.29604	--	--	Cinnamoyl-CoA reductase 1 GN=T24D18.5 OS=Arabidopsis thaliana (Mouse-ear cress) PE=1 SV=1	AT2G23910.1	--	NAD(P)-binding Rossmann-fold superfamily protein	LOC_Os10g42620.1	dihydroflavonol-4-reductase, putative, expressed
Sobic.001G518800	ME5	--	-1.54072	-2.22205	-2.41041	--	-1.12585	-1.44499	-1.35722	-2.03859	--	Benzoate--CoA ligase, peroxisomal GN=F12P19.5 OS=Arabidopsis thaliana (Mouse-ear cress) PE=1 SV=1	AT1G65880.1	BZO1	benzoyloxyglucosinolate 1	LOC_Os03g03790.1	AMP-binding domain containing protein, expressed
Sobic.005G056400	ME5	--	--	-3.04603	-2.12178	--	--	-1.21013	-1.97431	-1.44793	--	Fructose-bisphosphate aldolase, chloroplastic (Precursor) OS=Oryza sativa subsp. japonica (Rice) PE=1 SV=2	AT4G38970.1	FBA2	fructose-bisphosphate aldolase 2	LOC_Os11g07020.1	fructose-bisphospate aldolase isozyme, putative, expressed
Sobic.007G028200	ME5	-1.06299	-1.23033	-1.48999	-1.59885	-1.41874	--	--	-1.45477	--	--	UDP-glycosyltransferase 73D1 GN=UGT73D1 OS=Arabidopsis thaliana (Mouse-ear cress) PE=3 SV=1	AT3G53150.1	UGT73D1	UDP-glucosyl transferase 73D1	LOC_Os04g44240.1	cytokinin-O-glucosyltransferase 3, putative, expressed
Sobic.007G058900	ME5	-1.13062	-2.41938	-2.97721	-3.75602	-2.54928	-1.32418	-1.64966	-2.04018	-1.89334	--	Chalcone synthase 1 OS=Oryza sativa subsp. japonica (Rice) PE=2 SV=1	AT5G13930.1	ATCHS,CHS,TT4	Chalcone and stilbene synthase family protein	LOC_Os11g32650.1	chalcone synthase, putative, expressed
Sobic.001G542600	ME6	-1.56127	-1.6428	--	--	--	--	--	--	--	--	S-norcoclaurine synthase 1 GN=NCS1 OS=Coptis japonica (Japanese goldthread) PE=1 SV=1	AT1G17010.1	--	2-oxoglutarate (2OG) and Fe(II)-dependent oxygenase superfamily protein	LOC_Os01g24980.1	naringenin,2-oxoglutarate 3-dioxygenase, putative, expressed
Sobic.002G205300	ME6	-1.75608	--	--	1.3799	--	--	--	--	1.51181	--	Shikimate O-hydroxycinnamoyltransferase GN=HST OS=Nicotiana tabacum (Common tobacco) PE=1 SV=1	AT5G48930.1	HCT	hydroxycinnamoyl-CoA shikimate/quinate hydroxycinnamoyl transferase	LOC_Os09g25460.1	transferase family protein, putative, expressed
Sobic.002G242300	ME6	--	--	--	--	--	--	--	--	1.97198	--	Caffeoyl-CoA O-methyltransferase 6 GN=CCOAOMT6 OS=Nicotiana tabacum (Common tobacco) PE=2 SV=1	AT4G34050.1	CCoAOMT1	S-adenosyl-L-methionine-dependent methyltransferases superfamily protein	LOC_Os09g30360.1	caffeoyl-CoA O-methyltransferase, putative, expressed
Sobic.006G049200	ME7	--	--	--	1.22933	--	--	--	--	--	--	Violaxanthin de-epoxidase, chloroplastic (Precursor) OS=Arabidopsis thaliana (Mouse-ear cress) PE=1 SV=1	AT1G08550.2	AVDE1,NPQ1	non-photochemical quenching 1	LOC_Os04g31040.1	violaxanthin de-epoxidase, putative, expressed
Sobic.003G379500	ME9	--	--	--	-2.89556	-1.72504	-1.0846	-1.81677	--	-3.38479	-2.72322	Gibberellin 20 oxidase 2 OS=Oryza sativa subsp. japonica (Rice) PE=1 SV=1	AT4G25420.1	AT2301,ATGA20OX1,GA20OX1,GA5	2-oxoglutarate (2OG) and Fe(II)-dependent oxygenase superfamily protein	LOC_Os01g66100.1	gibberellin 20 oxidase 2, putative, expressed
Sobic.010G238600	ME9	--	--	--	-2.85045	--	--	--	--	-2.49791	--	Malonyl-CoA:anthocyanidin 5-O-glucoside-6&apos;&apos;-O-malonyltransferase GN=5MAT OS=Arabidopsis thaliana (Mouse-ear cress) PE=1 SV=1	AT3G29590.1	AT5MAT	HXXXD-type acyl-transferase family protein	LOC_Os04g51660.1	transferase family protein, putative, expressed
Sobic.002G186600	ME10	-3.12086	-3.77737	-2.58233	--	-2.75371	-1.42505	-1.61834	-2.24115	--	-1.98928	Strictosidine synthase 3 (Precursor) GN=SS3 OS=Arabidopsis thaliana (Mouse-ear cress) PE=2 SV=2	AT3G57030.1	--	Calcium-dependent phosphotriesterase superfamily protein	LOC_Os09g20684.1	SMP-30/Gluconolaconase/LRE-like region containing protein, expressed
Sobic.002G366500	ME10	1.44501	1.2603	1.80245	--	1.40395	--	--	--	--	--	Anthocyanin 3&apos;-O-beta-glucosyltransferase OS=Gentiana triflora (Clustered gentian) PE=1 SV=1	AT2G15480.1	UGT73B5	UDP-glucosyl transferase 73B5	LOC_Os01g45140.1	anthocyanin 3-O-beta-glucosyltransferase, putative, expressed
Sobic.008G012400	ME11	--	-1.08514	--	--	--	--	--	--	--	--	2-isopropylmalate synthase 1, chloroplastic (Precursor) GN=F15H18.3 OS=Arabidopsis thaliana (Mouse-ear cress) PE=1 SV=2	AT1G74040.1	IMS1,IPMS2,MAML-3	2-isopropylmalate synthase 1	LOC_Os12g04440.1	2-isopropylmalate synthase B, putative, expressed
Sobic.001G026100	ME1	--	--	--	-2.29149	--	--	--	--	--	--	Probable glycerol-3-phosphate acyltransferase 3 GN=GPAT3 OS=Arabidopsis thaliana (Mouse-ear cress) PE=2 SV=1	AT4G01950.1	ATGPAT3,GPAT3	glycerol-3-phosphate acyltransferase 3	LOC_Os03g61720.1	glycerol-3-phosphate acyltransferase, putative, expressed
Sobic.001G062300	ME1	--	--	--	-1.50228	--	--	--	--	--	--	Indole-3-acetaldehyde oxidase GN=AO2 OS=Zea mays (Maize) PE=2 SV=1	AT3G43600.1	AAO2,AO3,AOgamma,atAO-2,AtAO3	aldehyde oxidase 2	LOC_Os03g57690.1	aldehyde oxidase, putative, expressed
Sobic.008G012400	ME1	--	--	--	-1.78312	--	--	--	-1.99011	--	-2.93185	Protein SRG1 GN=SRG1 OS=Arabidopsis thaliana (Mouse-ear cress) PE=2 SV=1	AT1G78550.1	--	2-oxoglutarate (2OG) and Fe(II)-dependent oxygenase superfamily protein	LOC_Os03g32470.1	leucoanthocyanidin dioxygenase, putative, expressed
Sobic.003G300800	ME1	3.4927	2.53639	--	--	--	3.59871	1.37873	--	--	2.75073	Gibberellin 2-beta-dioxygenase GN=GA2OX1 OS=Phaseolus coccineus (Scarlet runner bean) PE=2 SV=1	AT1G78440.1	ATGA2OX1,GA2OX1	Arabidopsis thaliana gibberellin 2-oxidase 1	LOC_Os01g55240.1	gibberellin 2-beta-dioxygenase, putative, expressed
Sobic.003G357600	ME1	-1.91465	-1.78238	2.23321	1.62834	1.19387	--	--	1.73902	2.10495	--	Laccase-7 (Precursor) OS=Oryza sativa subsp. japonica (Rice) PE=2 SV=1	AT5G05390.1	LAC12	laccase 12	LOC_Os01g63190.1	laccase precursor protein, putative, expressed
Sobic.004G053700	ME1	1.11112	1.02426	--	--	--	1.19517	--	--	--	--	4-hydroxyphenylpyruvate dioxygenase OS=Hordeum vulgare (Barley) PE=2 SV=1	AT1G06570.1	HPD,PDS1	phytoene desaturation 1	LOC_Os02g07160.1	glyoxalase family protein, putative, expressed
Sobic.004G062500	ME1	--	--	-1.94137	-1.58857	--	--	--	--	--	--	Probable 4-coumarate--CoA ligase 3 OS=Oryza sativa subsp. japonica (Rice) PE=2 SV=1	AT3G21240.1	4CL2,AT4CL2	4-coumarate:CoA ligase 2	LOC_Os02g08100.1	AMP-binding domain containing protein, expressed
Sobic.004G200900	ME1	--	--	--	--	2.05434	--	--	1.59597	--	2.02505	Flavonoid 3&apos;-monooxygenase GN=CYP75B2 OS=Petunia hybrida (Petunia) PE=2 SV=1	AT5G07990.1	CYP75B1,D501,TT7	Cytochrome P450 superfamily protein	LOC_Os10g17260.1	cytochrome P450, putative, expressed
Sobic.004G328800	ME1	--	--	-2.38338	-1.36778	--	--	-1.10074	--	--	--	Anthocyanin 5-aromatic acyltransferase OS=Gentiana triflora (Clustered gentian) PE=1 SV=1	AT5G39080.1	--	HXXXD-type acyl-transferase family protein	LOC_Os07g23150.1	transferase family protein, putative, expressed
Sobic.006G188200	ME1	--	--	-5.77474	-4.10913	--	--	--	-5.05507	-4.00419	--	Beta-carotene hydroxylase 2, chloroplastic (Precursor; Fragment) GN=CA2 OS=Capsicum annuum (Bell pepper) PE=2 SV=1	AT4G25700.1	B1,BCH1,BETA-OHASE 1,chy1	beta-hydroxylase 1	LOC_Os04g48880.1	fatty acid hydroxylase, putative, expressed
Sobic.006G190100	ME1	--	--	-2.87804	-4.05554	-1.97463	--	--	-2.01247	-3.62742	--	Naringenin,2-oxoglutarate 3-dioxygenase GN=FHT OS=Dianthus caryophyllus (Carnation) PE=2 SV=1	AT4G10500.1	--	2-oxoglutarate (2OG) and Fe(II)-dependent oxygenase superfamily protein	LOC_Os04g49210.1	naringenin,2-oxoglutarate 3-dioxygenase, putative, expressed
Sobic.007G142100	ME1	--	--	-4.51652	-2.44855	-1.77481	--	--	-4.02706	-2.43739	--	Shikimate O-hydroxycinnamoyltransferase GN=HST OS=Nicotiana tabacum (Common tobacco) PE=1 SV=1	AT5G48930.1	HCT	hydroxycinnamoyl-CoA shikimate/quinate hydroxycinnamoyl transferase	LOC_Os09g25460.1	transferase family protein, putative, expressed
Sobic.009G064300	ME1	1.00846	1.21404	--	--	--	--	--	--	--	--	UDP-glycosyltransferase 73C5 GN=F13K3.20 OS=Arabidopsis thaliana (Mouse-ear cress) PE=2 SV=1	AT2G36800.1	DOGT1,UGT73C5	don-glucosyltransferase 1	LOC_Os10g09990.1	cytokinin-O-glucosyltransferase 3, putative, expressed
Sobic.009G162000	ME1	--	--	--	-1.89065	--	--	--	--	--	--	Glycerol-3-phosphate acyltransferase 5 GN=GPAT5 OS=Arabidopsis thaliana (Mouse-ear cress) PE=1 SV=1	AT3G11430.1	ATGPAT5,GPAT5	glycerol-3-phosphate acyltransferase 5	LOC_Os05g38350.1	glycerol-3-phosphate acyltransferase 8, putative, expressed
Sobic.009G243400	ME1	--	-1.65285	-1.70036	--	-1.9838	--	--	--	--	--	Cinnamoyl-CoA reductase 1 GN=T24D18.5 OS=Arabidopsis thaliana (Mouse-ear cress) PE=1 SV=1	AT5G14700.1	--	NAD(P)-binding Rossmann-fold superfamily protein	LOC_Os05g50250.1	cinnamoyl-CoA reductase-related, putative, expressed
Sobic.K000400	ME1	--	--	-1.96036	-1.56542	-3.27576	--	--	--	--	-1.75617	Shikimate O-hydroxycinnamoyltransferase GN=HST OS=Nicotiana tabacum (Common tobacco) PE=1 SV=1	AT5G48930.1	HCT	hydroxycinnamoyl-CoA shikimate/quinate hydroxycinnamoyl transferase	LOC_Os08g43040.1	transferase family protein, putative, expressed
Sobic.010G172200	ME1	-1.92126	-2.08302	--	--	--	--	--	--	--	2.20458	Tyrosine N-monooxygenase GN=CYP79A1 OS=Sorghum bicolor (Sorghum) PE=1 SV=3	AT4G39950.1	CYP79B2	cytochrome P450, family 79, subfamily B, polypeptide 2	LOC_Os03g37290.1	cytochrome P450, putative, expressed
Sobic.010G276400	ME1	--	--	--	--	-1.20746	--	--	--	-1.51529	--	Phytoene synthase, chloroplastic (Precursor) GN=Y1 OS=Zea mays (Maize) PE=3 SV=1	AT5G17230.1	PSY	PHYTOENE SYNTHASE	LOC_Os06g51290.1	phytoene synthase, chloroplast precursor, putative, expressed
Sobic.001G065800	ME2	--	1.0359	1.95876	--	1.46944	--	--	--	-1.51719	1.71507	Probable glutathione S-transferase GSTU1 GN=GSTU1 OS=Oryza sativa subsp. indica (Rice) PE=2 SV=1	AT1G17180.1	ATGSTU25,GSTU25	glutathione S-transferase TAU 25	LOC_Os09g20220.1	glutathione S-transferase, putative, expressed
Sobic.001G066000	ME2	1.23087	1.67983	2.31567	--	--	--	1.16861	--	--	--	Probable glutathione S-transferase GSTU1 OS=Oryza sativa subsp. japonica (Rice) PE=1 SV=1	AT1G53680.1	ATGSTU28,GSTU28	glutathione S-transferase TAU 28	LOC_Os09g20220.1	glutathione S-transferase, putative, expressed
Sobic.001G310500	ME2	--	--	--	--	-1.34271	--	--	--	--	--	Strictosidine synthase 1 (Precursor) GN=SS1 OS=Arabidopsis thaliana (Mouse-ear cress) PE=2 SV=2	AT3G51420.1	ATSSL4,SSL4	strictosidine synthase-like 4	LOC_Os10g39710.1	strictosidine synthase, putative, expressed
Sobic.003G068600	ME2	--	--	1.71423	--	-1.97618	--	--	--	--	--	Shikimate O-hydroxycinnamoyltransferase GN=HST OS=Nicotiana tabacum (Common tobacco) PE=1 SV=1	AT5G48930.1	HCT	hydroxycinnamoyl-CoA shikimate/quinate hydroxycinnamoyl transferase	LOC_Os08g43040.1	transferase family protein, putative, expressed
Sobic.004G125800	ME2	--	1.00355	--	--	--	--	--	--	--	--	Probable tocopherol cyclase, chloroplastic (Precursor) GN=SDX1 OS=Zea mays (Maize) PE=2 SV=1	AT4G32770.1	ATSDX1,VTE1	tocopherol cyclase, chloroplast / vitamin E deficient 1 (VTE1) / sucrose export defective 1 (SXD1)	LOC_Os02g17650.1	tocopherol cyclase, chloroplast precursor, putative, expressed
Sobic.004G182800	ME2	--	--	1.54619	--	--	--	--	--	--	--	Glutathione S-transferase Z1 GN=T16F16.18 OS=Arabidopsis thaliana (Mouse-ear cress) PE=1 SV=1	AT2G02380.1	ATGSTZ2,GSTZ2	glutathione S-transferase (class zeta) 2	LOC_Os02g35590.2	glutathione S-transferase, putative, expressed
Sobic.005G137300	ME2	1.02995	1.17845	2.63486	--	1.70228	--	--	--	--	--	Chalcone synthase 6 GN=CHS6 OS=Sorghum bicolor (Sorghum) PE=3 SV=1	AT5G13930.1	ATCHS,CHS,TT4	Chalcone and stilbene synthase family protein	LOC_Os11g32650.1	chalcone synthase, putative, expressed
Sobic.006G126300	ME2	--	1.05492	1.90927	--	--	--	--	1.6112	1.14788	--	Glucose-6-phosphate 1-dehydrogenase, cytoplasmic isoform GN=G6PDH OS=Solanum tuberosum (Potato) PE=2 SV=1	AT5G40760.1	G6PD6	glucose-6-phosphate dehydrogenase 6	LOC_Os02g38840.1	glucose-6-phosphate 1-dehydrogenase, cytoplasmic isoform, putative, expressed
Sobic.009G127400	ME2	--	--	1.80532	--	-1.13321	--	--	--	--	--	Protein PALE CRESS, chloroplastic (Precursor) GN=F11L15.2 OS=Arabidopsis thaliana (Mouse-ear cress) PE=2 SV=1	AT2G48120.1	PAC	pale cress protein (PAC)	LOC_Os05g32680.1	PAC, putative, expressed
Sobic.010G023700	ME2	--	-1.12103	--	--	--	--	--	--	--	--	Transketolase, chloroplastic OS=Zea mays (Maize) PE=1 SV=1	AT2G45290.1	--	Transketolase	LOC_Os06g04270.1	transketolase, chloroplast precursor, putative, expressed
Sobic.010G188300	ME2	--	--	-1.83797	--	--	--	--	-1.70727	--	--	Fructose-bisphosphate aldolase, cytoplasmic isozyme 1 OS=Pisum sativum (Garden pea) PE=1 SV=1	AT4G26530.2	--	Aldolase superfamily protein	LOC_Os06g40640.2	fructose-bisphospate aldolase isozyme, putative, expressed
Sobic.001G422300	ME3	--	--	--	--	1.55895	--	--	--	1.29725	--	Laccase-10 (Precursor) GN=OsJ_009911 OS=Oryza sativa subsp. japonica (Rice) PE=2 SV=1	AT5G60020.1	ATLAC17,LAC17	laccase 17	LOC_Os03g16610.1	laccase precursor protein, putative, expressed
Sobic.003G230900	ME3	--	--	1.72658	2.60322	2.95002	--	--	--	--	--	Dihydroflavonol-4-reductase GN=A1 OS=Zea mays (Maize) PE=3 SV=1	AT5G42800.1	DFR,M318,TT3	dihydroflavonol 4-reductase	LOC_Os01g44260.1	dihydroflavonol-4-reductase, putative, expressed
Sobic.006G216300	ME3	--	--	--	--	1.47075	--	--	--	--	--	Probable glutathione S-transferase GSTF1 OS=Oryza sativa subsp. japonica (Rice) PE=1 SV=2	AT3G62760.1	ATGSTF13	Glutathione S-transferase family protein	LOC_Os01g27360.1	glutathione S-transferase, putative, expressed
Sobic.010G040200	ME3	--	--	--	--	-3.80248	--	--	--	--	--	Rosmarinate synthase GN=RAS OS=Melissa officinalis (Lemon balm) PE=1 SV=1	AT1G31490.1	--	HXXXD-type acyl-transferase family protein	LOC_Os06g05750.1	transferase family domain containing protein, expressed
Sobic.010G172700	ME3	--	--	--	--	1.27128	--	--	--	--	--	Ent-kaurene oxidase, chloroplastic GN=T1N24.23 OS=Arabidopsis thaliana (Mouse-ear cress) PE=1 SV=2	AT5G25900.1	ATKO1,CYP701A3,GA3	GA requiring 3	LOC_Os06g37364.2	cytochrome P450, putative, expressed
Sobic.001G403100	ME4	--	--	--	-2.47066	--	--	--	--	--	--	Laccase-3 (Precursor) GN=B1088C09.5 OS=Oryza sativa subsp. japonica (Rice) PE=2 SV=1	AT2G40370.1	LAC5	laccase 5	LOC_Os01g61160.1	laccase precursor protein, putative, expressed
Sobic.001G500800	ME4	--	--	--	-1.4643	--	--	--	--	--	--	4-coumarate--CoA ligase-like 1 GN=4CLL1 OS=Oryza sativa subsp. japonica (Rice) PE=2 SV=2	AT4G05160.1	--	AMP-dependent synthetase and ligase family protein	LOC_Os03g05780.1	4-coumarate--CoA ligase-like 7, putative, expressed
Sobic.001G514100	ME4	--	--	--	1.43789	--	--	--	--	--	-1.54178	Glutathione S-transferase F11 GN=T17B22.12 OS=Arabidopsis thaliana (Mouse-ear cress) PE=2 SV=1	AT3G03190.1	ATGSTF11,ATGSTF6,GSTF11	glutathione S-transferase F11	LOC_Os03g04260.1	glutathione S-transferase, putative, expressed
Sobic.003G353200	ME4	--	--	--	-2.03509	--	--	--	--	--	-2.31734	Putative laccase-5 (Precursor) OS=Oryza sativa subsp. japonica (Rice) PE=2 SV=1	AT2G29130.1	ATLAC2,LAC2	laccase 2	LOC_Os01g62600.1	laccase precursor protein, putative, expressed
Sobic.004G038300	ME4	--	--	-1.97347	--	--	--	--	--	--	--	Achilleol B synthase OS=Oryza sativa subsp. japonica (Rice) PE=1 SV=1	AT2G07050.1	CAS1	cycloartenol synthase 1	LOC_Os11g35710.1	cycloartenol synthase, putative, expressed
Sobic.005G086100	ME4	--	--	--	--	-1.52884	--	--	--	--	--	Glutathione S-transferase zeta class OS=Euphorbia esula (Leafy spurge) PE=2 SV=1	AT2G02380.1	ATGSTZ2,GSTZ2	glutathione S-transferase (class zeta) 2	LOC_Os11g14040.1	glutathione S-transferase, N-terminal domain containing protein, expressed
Sobic.005G172900	ME4	1.02604	--	--	--	--	--	--	--	--	--	Hydroquinone glucosyltransferase GN=AS OS=Rauvolfia serpentina (Serpentwood) PE=1 SV=1	AT4G01070.1	GT72B1,UGT72B1	UDP-Glycosyltransferase superfamily protein	LOC_Os11g38650.1	UDP-glucoronosyl/UDP-glucosyl transferase, putative, expressed
Sobic.005G173200	ME4	1.35006	--	--	--	1.36912	--	--	--	--	--	Hydroquinone glucosyltransferase GN=AS OS=Rauvolfia serpentina (Serpentwood) PE=1 SV=1	AT4G01070.1	GT72B1,UGT72B1	UDP-Glycosyltransferase superfamily protein	LOC_Os11g38650.1	UDP-glucoronosyl/UDP-glucosyl transferase, putative, expressed
Sobic.006G136800	ME4	--	--	-1.97364	--	--	--	--	--	-1.19416	--	Shikimate O-hydroxycinnamoyltransferase GN=HST OS=Nicotiana tabacum (Common tobacco) PE=1 SV=1	AT5G48930.1	HCT	hydroxycinnamoyl-CoA shikimate/quinate hydroxycinnamoyl transferase	LOC_Os04g42250.2	transferase family protein, putative, expressed
Sobic.007G141200	ME4	--	--	-2.62322	-1.79833	--	--	--	--	--	--	Cinnamoyl-CoA reductase 1 GN=T24D18.5 OS=Arabidopsis thaliana (Mouse-ear cress) PE=1 SV=1	AT1G15950.1	ATCCR1,CCR1,IRX4	cinnamoyl coa reductase 1	LOC_Os08g34280.1	cinnamoyl-CoA reductase, putative, expressed
Sobic.009G077500	ME4	2.30725	--	--	--	--	2.20147	1.59526	--	--	-2.40032	Gibberellin 2-beta-dioxygenase 1 GN=GA2OX1 OS=Pisum sativum (Garden pea) PE=1 SV=1	AT1G78440.1	ATGA2OX1,GA2OX1	Arabidopsis thaliana gibberellin 2-oxidase 1	LOC_Os01g11150.1	gibberellin 2-beta-dioxygenase, putative, expressed
Sobic.010G060300	ME4	--	--	--	--	-1.73697	--	--	--	--	--	Codeine O-demethylase GN=CODM OS=Papaver somniferum (Opium poppy) PE=1 SV=1	AT5G20550.1	--	2-oxoglutarate (2OG) and Fe(II)-dependent oxygenase superfamily protein	LOC_Os06g08060.1	leucoanthocyanidin dioxygenase, putative, expressed
Sobic.001G305600	ME5	-1.25165	-1.39916	-2.59214	-1.42304	--	--	--	-1.71754	--	--	Branched-chain-amino-acid aminotransferase 5, chloroplastic (Precursor) GN=BCAT5 OS=Arabidopsis thaliana (Mouse-ear cress) PE=1 SV=1	AT5G65780.1	ATBCAT-5	branched-chain amino acid aminotransferase 5 / branched-chain amino acid transaminase 5 (BCAT5)	LOC_Os05g48450.1	aminotransferase domain containing protein, putative, expressed
Sobic.003G036000	ME5	-1.19482	-2.00057	-3.54384	-2.0085	--	--	-1.18507	-1.64495	--	--	NADP-dependent malic enzyme, chloroplastic (Precursor) GN=MOD1 OS=Zea mays (Maize) PE=1 SV=1	AT1G79750.1	ATNADP-ME4,NADP-ME4	NADP-malic enzyme 4	LOC_Os01g09320.1	NADP-dependent malic enzyme, chloroplast precursor, putative, expressed
Sobic.003G260000	ME5	--	--	-1.52933	--	--	--	--	--	--	--	Malonyl-CoA:anthocyanidin 5-O-glucoside-6&apos;&apos;-O-malonyltransferase GN=5MAT OS=Arabidopsis thaliana (Mouse-ear cress) PE=1 SV=1	AT3G29670.1	--	HXXXD-type acyl-transferase family protein	LOC_Os02g28300.1	transferase family protein, putative, expressed
Sobic.003G342100	ME5	-1.60101	-2.1417	-2.67531	--	--	-1.07567	-1.54804	-1.31401	--	--	Cinnamoyl-CoA reductase 1 GN=T24D18.5 OS=Arabidopsis thaliana (Mouse-ear cress) PE=1 SV=1	AT5G58490.1	--	NAD(P)-binding Rossmann-fold superfamily protein	LOC_Os01g61230.1	dihydroflavonol-4-reductase, putative, expressed
Sobic.003G391600	ME5	--	--	-1.61488	--	--	--	--	--	--	--	4-coumarate--CoA ligase-like 5 GN=B1065G12.9 OS=Oryza sativa subsp. japonica (Rice) PE=2 SV=1	AT5G63380.1	--	AMP-dependent synthetase and ligase family protein	LOC_Os01g67540.1	AMP-binding domain containing protein, expressed
Sobic.004G032400	ME5	--	--	-3.87146	-1.21992	--	--	-1.2054	-2.86023	-1.54307	--	Succinate dehydrogenase [ubiquinone] flavoprotein subunit, mitochondrial (Precursor) GN=P0507H12.27 OS=Oryza sativa subsp. japonica (Rice) PE=2 SV=1	AT5G14760.1	AO	L-aspartate oxidase	LOC_Os02g04170.1	L-aspartate oxidase 1, putative, expressed
Sobic.005G068700	ME5	-1.82875	-2.09646	-3.13987	-2.07419	--	--	--	-1.52962	-1.38781	--	Probable NAD kinase 2, chloroplastic (Precursor) OS=Oryza sativa subsp. japonica (Rice) PE=2 SV=1	AT1G21640.1	ATNADK2,NADK2	NAD kinase 2	LOC_Os11g08670.1	NAD kinase, putative, expressed
Sobic.008G109700	ME5	--	--	-1.67226	-1.94262	-1.12669	--	--	--	--	--	2&apos;-deoxymugineic-acid 2&apos;-dioxygenase GN=IDS3 OS=Hordeum vulgare (Barley) PE=1 SV=3	AT4G10490.1	--	2-oxoglutarate (2OG) and Fe(II)-dependent oxygenase superfamily protein	LOC_Os07g07410.2	oxidoreductase, 2OG-Fe oxygenase family protein, putative, expressed
Sobic.010G059800	ME5	1.00138	--	--	--	--	--	--	--	--	--	Protein SRG1 GN=SRG1 OS=Arabidopsis thaliana (Mouse-ear cress) PE=2 SV=1	AT5G20550.1	--	2-oxoglutarate (2OG) and Fe(II)-dependent oxygenase superfamily protein	LOC_Os06g08014.1	hydroxylase, putative, expressed
Sobic.001G280000	ME6	-1.02429	-1.41749	--	--	--	--	--	--	1.20279	2.22896	Serine carboxypeptidase-like 18 (Precursor) GN=SCPL18 OS=Arabidopsis thaliana (Mouse-ear cress) PE=2 SV=2	AT1G73270.1	scpl6	serine carboxypeptidase-like 6	LOC_Os10g01134.1	OsSCP46 - Putative Serine Carboxypeptidase homologue, expressed
Sobic.002G121100	ME6	--	--	--	-1.63135	--	--	--	--	-1.13007	--	Serine carboxypeptidase-like 7 (Precursor) GN=SCPL7 OS=Arabidopsis thaliana (Mouse-ear cress) PE=2 SV=1	AT3G10450.1	SCPL7	serine carboxypeptidase-like 7	LOC_Os11g24510.1	OsSCP56 - Putative Serine Carboxypeptidase homologue, expressed
Sobic.003G232900	ME6	--	--	--	-2.03764	--	--	--	--	--	--	Anthocyanin 3&apos;-O-beta-glucosyltransferase OS=Gentiana triflora (Clustered gentian) PE=1 SV=1	AT2G15480.2	UGT73B5	UDP-glucosyl transferase 73B5	LOC_Os01g45110.1	anthocyanin 3-O-beta-glucosyltransferase, putative, expressed
Sobic.004G095500	ME6	1.00836	1.64807	--	--	1.36616	--	--	1.8746	--	1.55384	Cytochrome P450 711A1 OS=Arabidopsis thaliana (Mouse-ear cress) PE=2 SV=1	AT2G26170.1	CYP711A1,MAX1	cytochrome P450, family 711, subfamily A, polypeptide 1	LOC_Os02g12890.1	cytochrome P450, putative, expressed
Sobic.004G225200	ME6	--	--	--	-1.47466	--	--	--	--	-1.46499	--	Bifunctional nitrilase/nitrile hydratase NIT4 OS=Oryza sativa subsp. japonica (Rice) PE=2 SV=1	AT5G22300.1	AtNIT4,NIT4	nitrilase 4	LOC_Os02g42350.1	nitrilase, putative, expressed
Sobic.001G166300	ME7	--	--	--	-1.25164	--	1.05257	--	--	-1.35985	--	Flavonol synthase/flavanone 3-hydroxylase GN=FLS OS=Citrus unshiu (Satsuma mandarin) PE=1 SV=1	AT3G19010.1	--	2-oxoglutarate (2OG) and Fe(II)-dependent oxygenase superfamily protein	LOC_Os03g42130.1	gibberellin 20 oxidase 2, putative, expressed
Sobic.001G196300	ME7	--	--	--	-1.65646	--	--	--	-1.38412	-1.2853	--	Cytochrome P450 84A1 GN=F23E13.110 OS=Arabidopsis thaliana (Mouse-ear cress) PE=2 SV=1	AT4G36220.1	CYP84A1,FAH1	ferulic acid 5-hydroxylase 1	LOC_Os10g36848.1	cytochrome P450, putative, expressed
Sobic.002G175500	ME7	--	--	--	1.75254	--	-1.0848	--	--	1.5994	--	Serine carboxypeptidase-like 17 (Precursor) GN=SCPL17 OS=Arabidopsis thaliana (Mouse-ear cress) PE=2 SV=1	AT3G12203.1	scpl17	serine carboxypeptidase-like 17	LOC_Os10g01110.1	OsSCP44 - Putative Serine Carboxypeptidase homologue, expressed
Sobic.004G050300	ME7	--	--	1.89855	1.47996	--	--	--	1.52326	--	--	Prolycopene isomerase, chloroplastic (Precursor) GN=CRTISO OS=Daucus carota (Carrot) PE=2 SV=1	AT5G49555.1	--	FAD/NAD(P)-binding oxidoreductase family protein	LOC_Os12g43590.1	FAD dependent oxidoreductase domain containing protein, expressed
Sobic.008G074400	ME7	-1.06142	-1.0638	--	--	-1.61533	--	--	--	1.54954	--	Glutathione S-transferase GN=GSTZ1 OS=Triticum aestivum (Wheat) PE=1 SV=1	AT2G02380.1	ATGSTZ2,GSTZ2	glutathione S-transferase (class zeta) 2	LOC_Os12g10730.1	glutathione S-transferase, putative, expressed
Sobic.002G137800	ME8	1.17183	1.80265	2.39268	--	2.85672	1.27959	1.50831	2.20947	--	3.54884	1-aminocyclopropane-1-carboxylate oxidase homolog 1 GN=At1g06620 OS=Arabidopsis thaliana (Mouse-ear cress) PE=2 SV=1	AT2G36690.1	--	2-oxoglutarate (2OG) and Fe(II)-dependent oxygenase superfamily protein	LOC_Os08g44590.1	gibberellin 20 oxidase 2, putative, expressed
Sobic.002G368000	ME8	--	--	1.51016	--	1.60947	--	--	--	--	--	Probable 6-phosphogluconolactonase 2 OS=Oryza sativa subsp. japonica (Rice) PE=2 SV=1	AT1G13700.1	PGL1	6-phosphogluconolactonase 1	LOC_Os07g41280.1	6-phosphogluconolactonase, putative, expressed
Sobic.003G342200	ME8	--	--	--	-1.57858	--	--	--	--	-1.25873	--	Cinnamoyl-CoA reductase 1 GN=T24D18.5 OS=Arabidopsis thaliana (Mouse-ear cress) PE=1 SV=1	AT5G58490.1	--	NAD(P)-binding Rossmann-fold superfamily protein	LOC_Os01g61230.1	dihydroflavonol-4-reductase, putative, expressed
Sobic.009G080400	ME8	--	1.55085	2.31999	--	2.85184	--	--	2.32411	--	3.33593	Hydroquinone glucosyltransferase GN=AS OS=Rauvolfia serpentina (Serpentwood) PE=1 SV=1	AT1G01420.1	UGT72B3	UDP-glucosyl transferase 72B3	LOC_Os05g12450.1	hydroquinone glucosyltransferase, putative, expressed
Sobic.001G314300	ME9	-1.21282	-1.04767	--	-2.43923	-1.45376	--	--	--	-1.30492	--	Flavonol synthase/flavanone 3-hydroxylase GN=FLS OS=Citrus unshiu (Satsuma mandarin) PE=1 SV=1	AT5G24530.1	DMR6	2-oxoglutarate (2OG) and Fe(II)-dependent oxygenase superfamily protein	LOC_Os10g39140.1	flavonol synthase/flavanone 3-hydroxylase, putative, expressed
Sobic.001G526900	ME9	--	-1.28687	--	--	--	--	--	--	--	--	Naringenin,2-oxoglutarate 3-dioxygenase OS=Malus domestica (Apple) PE=2 SV=1	AT5G24530.1	DMR6	2-oxoglutarate (2OG) and Fe(II)-dependent oxygenase superfamily protein	LOC_Os03g03034.1	flavonol synthase/flavanone 3-hydroxylase, putative, expressed
Sobic.002G158900	ME9	--	--	--	1.59132	--	--	--	--	--	--	4-coumarate--CoA ligase-like 7 GN=P0474B11.33 OS=Oryza sativa subsp. japonica (Rice) PE=2 SV=1	AT5G63380.1	--	AMP-dependent synthetase and ligase family protein	LOC_Os07g17970.1	AMP-binding domain containing protein, expressed
Sobic.003G047500	ME9	--	--	--	-1.46834	--	--	--	--	--	--	UDP-glycosyltransferase 73C3 GN=UGT73C3 OS=Arabidopsis thaliana (Mouse-ear cress) PE=2 SV=1	AT2G36780.1	--	UDP-Glycosyltransferase superfamily protein	LOC_Os01g08110.1	flavonol-3-O-glycoside-7-O-glucosyltransferase 1, putative, expressed
Sobic.003G047800	ME10	-1.44423	-1.357	--	--	-1.14846	--	--	-1.74008	--	--	UDP-glycosyltransferase 73C5 GN=F13K3.20 OS=Arabidopsis thaliana (Mouse-ear cress) PE=2 SV=1	AT2G36800.1	DOGT1,UGT73C5	don-glucosyltransferase 1	LOC_Os10g09990.1	cytokinin-O-glucosyltransferase 3, putative, expressed
Sobic.006G227000	ME10	--	--	--	--	1.28459	--	--	--	--	--	Anthocyanidin reductase GN=T13M11.8 OS=Arabidopsis thaliana (Mouse-ear cress) PE=1 SV=2	AT1G61720.1	BAN	NAD(P)-binding Rossmann-fold superfamily protein	LOC_Os04g53850.1	leucoanthocyanidin reductase, putative, expressed
Sobic.007G089900	ME10	-1.37438	-1.84424	--	-1.42056	-1.16828	-1.01527	-1.65941	-1.49102	--	--	Probable 4-coumarate--CoA ligase 1 GN=OJ1033_B09.16 OS=Oryza sativa subsp. japonica (Rice) PE=2 SV=2	AT3G21240.1	4CL2,AT4CL2	4-coumarate:CoA ligase 2	LOC_Os08g14760.1	AMP-binding domain containing protein, expressed
Sobic.007G063300	ME11	-1.2972	-1.13031	--	--	-1.44383	--	--	--	--	--	Cinnamoyl-CoA reductase 1 GN=T24D18.5 OS=Arabidopsis thaliana (Mouse-ear cress) PE=1 SV=1	AT2G33590.1	--	NAD(P)-binding Rossmann-fold superfamily protein	LOC_Os06g41810.1	reductase, putative, expressed
Sobic.001G319500	ME13	--	1.3265	--	-2.09829	--	--	--	--	--	--	Glutathione S-transferase U17 GN=At1g10370 OS=Arabidopsis thaliana (Mouse-ear cress) PE=2 SV=1	AT1G10370.1	ATGSTU17,ERD9,GST30,GST30B	Glutathione S-transferase family protein	LOC_Os10g38140.1	glutathione S-transferase, putative, expressed
Sobic.001G479500	ME13	-1.20042	-1.10011	--	--	--	--	--	--	--	--	Dihydroflavonol-4-reductase GN=F OS=Callistephus chinensis (China aster) PE=2 SV=1	AT4G33360.1	FLDH	NAD(P)-binding Rossmann-fold superfamily protein	LOC_Os03g08624.1	dihydroflavonol-4-reductase, putative, expressed
Sobic.010G071800	ME13	1.05095	1.11456	--	--	--	--	--	--	--	--	Probable cinnamyl alcohol dehydrogenase 1 OS=Oryza sativa subsp. japonica (Rice) PE=2 SV=1	AT1G72680.1	ATCAD1,CAD1	cinnamyl-alcohol dehydrogenase	LOC_Os10g11810.1	dehydrogenase, putative, expressed
Sobic.004G225100	ME14	--	--	--	-1.31433	--	--	--	--	-1.3781	--	Bifunctional nitrilase/nitrile hydratase NIT4 OS=Oryza sativa subsp. japonica (Rice) PE=2 SV=1	AT5G22300.1	AtNIT4,NIT4	nitrilase 4	LOC_Os02g42330.1	nitrilase, putative, expressed
Sobic.001G366100	ME16	1.6626	2.10909	--	--	1.37012	--	--	--	--	--	S-norcoclaurine synthase 1 GN=NCS1 OS=Coptis japonica (Japanese goldthread) PE=1 SV=1	AT1G17020.1	ATSRG1,SRG1	senescence-related gene 1	LOC_Os10g40934.3	flavonol synthase/flavanone 3-hydroxylase, putative, expressed
Sobic.008G079300	ME16	--	-1.38939	--	--	--	--	--	--	--	--	Probable glutathione S-transferase GSTF1 OS=Oryza sativa subsp. japonica (Rice) PE=1 SV=2	AT3G62760.1	ATGSTF13	Glutathione S-transferase family protein	LOC_Os01g27360.1	glutathione S-transferase, putative, expressed
Sobic.003G036300	ME17	--	-1.25432	-2.54269	--	--	--	-1.1596	-1.79142	--	--	S-norcoclaurine synthase 1 GN=NCS1 OS=Coptis japonica (Japanese goldthread) PE=1 SV=1	AT1G35190.1	--	2-oxoglutarate (2OG) and Fe(II)-dependent oxygenase superfamily protein	LOC_Os01g09300.2	oxidoreductase, putative, expressed
Sobic.003G426400	ME17	--	1.27822	1.5179	--	--	--	--	--	--	--	Probable glutathione S-transferase OS=Nicotiana tabacum (Common tobacco) PE=2 SV=1	AT3G09270.1	ATGSTU8,GSTU8	glutathione S-transferase TAU 8	LOC_Os01g72170.1	glutathione S-transferase, putative, expressed
Sobic.002G041900	ME18	-2.1472	-2.19604	--	-1.82255	--	--	--	--	--	--	Phenolic glucoside malonyltransferase 1 GN=PMAT1 OS=Arabidopsis thaliana (Mouse-ear cress) PE=1 SV=1	AT3G29670.1	--	HXXXD-type acyl-transferase family protein	LOC_Os02g28300.1	transferase family protein, putative, expressed
Sobic.001G196300	ME1	--	--	--	-1.65646	--	--	--	-1.38412	-1.2853	--	Cytochrome P450 84A1 GN=F23E13.110 OS=Arabidopsis thaliana (Mouse-ear cress) PE=2 SV=1	AT4G36220.1	CYP84A1,FAH1	ferulic acid 5-hydroxylase 1	LOC_Os10g36848.1	cytochrome P450, putative, expressed
Sobic.003G353200	ME1	--	--	--	-2.03509	--	--	--	--	--	-2.31734	Putative laccase-5 (Precursor) OS=Oryza sativa subsp. japonica (Rice) PE=2 SV=1	AT2G29130.1	ATLAC2,LAC2	laccase 2	LOC_Os01g62600.1	laccase precursor protein, putative, expressed
Sobic.003G360700	ME1	--	--	--	--	--	--	--	--	--	-2.36177	Glycerol-3-phosphate 2-O-acyltransferase 6 GN=GPAT6 OS=Arabidopsis thaliana (Mouse-ear cress) PE=1 SV=1	AT2G38110.1	ATGPAT6,GPAT6	glycerol-3-phosphate acyltransferase 6	LOC_Os01g63580.1	glycerol-3-phosphate acyltransferase, putative, expressed
Sobic.004G032400	ME1	--	--	-3.87146	-1.21992	--	--	-1.2054	-2.86023	-1.54307	--	Succinate dehydrogenase [ubiquinone] flavoprotein subunit, mitochondrial (Precursor) GN=P0507H12.27 OS=Oryza sativa subsp. japonica (Rice) PE=2 SV=1	AT5G14760.1	AO	L-aspartate oxidase	LOC_Os02g04170.1	L-aspartate oxidase 1, putative, expressed
Sobic.004G288500	ME1	--	--	--	--	--	--	--	-1.55591	--	-1.7926	Cytochrome P450 86A2 OS=Arabidopsis thaliana (Mouse-ear cress) PE=2 SV=1	AT4G00360.1	ATT1,CYP86A2	cytochrome P450, family 86, subfamily A, polypeptide 2	LOC_Os02g44654.1	cytochrome P450, putative, expressed
Sobic.004G348700	ME1	--	--	--	--	--	--	--	--	--	-1.58212	Malonyl-coenzyme A:anthocyanin 3-O-glucoside-6&apos;&apos;-O-malonyltransferase GN=3MAT OS=Dahlia pinnata (Pinnate dahlia) PE=1 SV=1	AT1G03940.1	--	HXXXD-type acyl-transferase family protein	LOC_Os02g57480.1	transferase family protein, putative, expressed
Sobic.005G005800	ME1	--	--	--	--	--	--	--	-1.38385	-1.41742	-2.16393	Laccase-23 (Precursor) GN=LAC23 OS=Oryza sativa subsp. japonica (Rice) PE=2 SV=1	AT5G05390.1	LAC12	laccase 12	LOC_Os12g01730.1	laccase-23 precursor, putative, expressed
Sobic.006G177000	ME1	--	--	--	--	--	--	--	-1.32609	--	-1.80221	Cytochrome P450 86A2 OS=Arabidopsis thaliana (Mouse-ear cress) PE=2 SV=1	AT1G01600.1	CYP86A4	cytochrome P450, family 86, subfamily A, polypeptide 4	LOC_Os04g47250.1	cytochrome P450, putative, expressed
Sobic.009G077500	ME1	2.30725	--	--	--	--	2.20147	1.59526	--	--	-2.40032	Gibberellin 2-beta-dioxygenase 1 GN=GA2OX1 OS=Pisum sativum (Garden pea) PE=1 SV=1	AT1G78440.1	ATGA2OX1,GA2OX1	Arabidopsis thaliana gibberellin 2-oxidase 1	LOC_Os01g11150.1	gibberellin 2-beta-dioxygenase, putative, expressed
Sobic.009G157000	ME1	--	--	--	--	--	--	--	-1.35838	--	-2.71108	Glycerol-3-phosphate 2-O-acyltransferase 6 GN=GPAT6 OS=Arabidopsis thaliana (Mouse-ear cress) PE=1 SV=1	AT2G38110.1	ATGPAT6,GPAT6	glycerol-3-phosphate acyltransferase 6	LOC_Os05g37600.1	glycerol-3-phosphate acyltransferase, putative, expressed
Sobic.009G187000	ME1	--	--	--	--	--	--	--	-2.12434	--	-2.97807	UDP-glycosyltransferase 73C5 GN=F13K3.20 OS=Arabidopsis thaliana (Mouse-ear cress) PE=2 SV=1	AT2G36800.1	DOGT1,UGT73C5	don-glucosyltransferase 1	LOC_Os05g42020.1	UDP-glucoronosyl and UDP-glucosyl transferase domain containing protein, expressed
Sobic.010G188300	ME1	--	--	-1.83797	--	--	--	--	-1.70727	--	--	Fructose-bisphosphate aldolase, cytoplasmic isozyme 1 OS=Pisum sativum (Garden pea) PE=1 SV=1	AT4G26530.2	--	Aldolase superfamily protein	LOC_Os06g40640.2	fructose-bisphospate aldolase isozyme, putative, expressed
Sobic.002G107000	ME2	--	--	--	--	--	--	--	1.71973	--	--	Putative aldehyde oxidase-like protein GN=P0557D09.31 OS=Oryza sativa subsp. japonica (Rice) PE=2 SV=1	AT3G43600.1	AAO2,AO3,AOgamma,atAO-2,AtAO3	aldehyde oxidase 2	LOC_Os07g18120.1	aldehyde oxidase, putative, expressed
Sobic.004G050300	ME2	--	--	1.89855	1.47996	--	--	--	1.52326	--	--	Prolycopene isomerase, chloroplastic (Precursor) GN=CRTISO OS=Daucus carota (Carrot) PE=2 SV=1	AT5G49555.1	--	FAD/NAD(P)-binding oxidoreductase family protein	LOC_Os12g43590.1	FAD dependent oxidoreductase domain containing protein, expressed
Sobic.004G095500	ME2	1.00836	1.64807	--	--	1.36616	--	--	1.8746	--	1.55384	Cytochrome P450 711A1 OS=Arabidopsis thaliana (Mouse-ear cress) PE=2 SV=1	AT2G26170.1	CYP711A1,MAX1	cytochrome P450, family 711, subfamily A, polypeptide 1	LOC_Os02g12890.1	cytochrome P450, putative, expressed
Sobic.004G200800	ME2	--	--	--	--	--	--	--	3.0082	2.19329	--	Flavonoid 3&apos;-monooxygenase GN=CYP75B2 OS=Petunia hybrida (Petunia) PE=2 SV=1	AT5G07990.1	CYP75B1,D501,TT7	Cytochrome P450 superfamily protein	LOC_Os10g17260.1	cytochrome P450, putative, expressed
Sobic.001G042000	ME3	--	--	--	--	--	--	--	--	--	1.52693	Zerumbone synthase GN=ZSD1 OS=Zingiber zerumbet (Shampoo ginger) PE=1 SV=1	AT1G52340.1	ABA2,ATABA2,ATSDR1,GIN1,ISI4,SDR1,SIS4,SRE1	NAD(P)-binding Rossmann-fold superfamily protein	LOC_Os03g59610.1	oxidoreductase, short chain dehydrogenase/reductase family protein, putative, expressed
Sobic.001G280000	ME3	-1.02429	-1.41749	--	--	--	--	--	--	1.20279	2.22896	Serine carboxypeptidase-like 18 (Precursor) GN=SCPL18 OS=Arabidopsis thaliana (Mouse-ear cress) PE=2 SV=2	AT1G73270.1	scpl6	serine carboxypeptidase-like 6	LOC_Os10g01134.1	OsSCP46 - Putative Serine Carboxypeptidase homologue, expressed
Sobic.001G321000	ME3	--	--	--	--	--	--	--	--	1.33092	--	Flavonol synthase/flavanone 3-hydroxylase (Fragment) OS=Matthiola incana (Common stock) PE=2 SV=1	AT4G16770.1	--	2-oxoglutarate (2OG) and Fe(II)-dependent oxygenase superfamily protein	LOC_Os10g37880.1	oxidoreductase, putative, expressed
Sobic.001G514100	ME3	--	--	--	1.43789	--	--	--	--	--	-1.54178	Glutathione S-transferase F11 GN=T17B22.12 OS=Arabidopsis thaliana (Mouse-ear cress) PE=2 SV=1	AT3G03190.1	ATGSTF11,ATGSTF6,GSTF11	glutathione S-transferase F11	LOC_Os03g04260.1	glutathione S-transferase, putative, expressed
Sobic.002G121100	ME3	--	--	--	-1.63135	--	--	--	--	-1.13007	--	Serine carboxypeptidase-like 7 (Precursor) GN=SCPL7 OS=Arabidopsis thaliana (Mouse-ear cress) PE=2 SV=1	AT3G10450.1	SCPL7	serine carboxypeptidase-like 7	LOC_Os11g24510.1	OsSCP56 - Putative Serine Carboxypeptidase homologue, expressed
Sobic.002G137800	ME3	1.17183	1.80265	2.39268	--	2.85672	1.27959	1.50831	2.20947	--	3.54884	1-aminocyclopropane-1-carboxylate oxidase homolog 1 GN=At1g06620 OS=Arabidopsis thaliana (Mouse-ear cress) PE=2 SV=1	AT2G36690.1	--	2-oxoglutarate (2OG) and Fe(II)-dependent oxygenase superfamily protein	LOC_Os08g44590.1	gibberellin 20 oxidase 2, putative, expressed
Sobic.003G342200	ME3	--	--	--	-1.57858	--	--	--	--	-1.25873	--	Cinnamoyl-CoA reductase 1 GN=T24D18.5 OS=Arabidopsis thaliana (Mouse-ear cress) PE=1 SV=1	AT5G58490.1	--	NAD(P)-binding Rossmann-fold superfamily protein	LOC_Os01g61230.1	dihydroflavonol-4-reductase, putative, expressed
Sobic.004G200900	ME3	--	--	--	--	2.05434	--	--	1.59597	--	2.02505	Flavonoid 3&apos;-monooxygenase GN=CYP75B2 OS=Petunia hybrida (Petunia) PE=2 SV=1	AT5G07990.1	CYP75B1,D501,TT7	Cytochrome P450 superfamily protein	LOC_Os10g17260.1	cytochrome P450, putative, expressed
Sobic.006G257500	ME3	--	--	--	--	--	--	--	--	--	1.72636	Hyoscyamine 6-dioxygenase GN=H6H OS=Hyoscyamus niger (Black henbane) PE=1 SV=1	AT3G60290.1	--	2-oxoglutarate (2OG) and Fe(II)-dependent oxygenase superfamily protein	LOC_Os04g57180.1	flavonol synthase/flavanone 3-hydroxylase, putative, expressed
Sobic.009G080400	ME3	--	1.55085	2.31999	--	2.85184	--	--	2.32411	--	3.33593	Hydroquinone glucosyltransferase GN=AS OS=Rauvolfia serpentina (Serpentwood) PE=1 SV=1	AT1G01420.1	UGT72B3	UDP-glucosyl transferase 72B3	LOC_Os05g12450.1	hydroquinone glucosyltransferase, putative, expressed
Sobic.K000400	ME3	--	--	-1.96036	-1.56542	-3.27576	--	--	--	--	-1.75617	Shikimate O-hydroxycinnamoyltransferase GN=HST OS=Nicotiana tabacum (Common tobacco) PE=1 SV=1	AT5G48930.1	HCT	hydroxycinnamoyl-CoA shikimate/quinate hydroxycinnamoyl transferase	LOC_Os08g43040.1	transferase family protein, putative, expressed
Sobic.010G172200	ME3	-1.92126	-2.08302	--	--	--	--	--	--	--	2.20458	Tyrosine N-monooxygenase GN=CYP79A1 OS=Sorghum bicolor (Sorghum) PE=1 SV=3	AT4G39950.1	CYP79B2	cytochrome P450, family 79, subfamily B, polypeptide 2	LOC_Os03g37290.1	cytochrome P450, putative, expressed
Sobic.001G065800	ME4	--	1.0359	1.95876	--	1.46944	--	--	--	-1.51719	1.71507	Probable glutathione S-transferase GSTU1 GN=GSTU1 OS=Oryza sativa subsp. indica (Rice) PE=2 SV=1	AT1G17180.1	ATGSTU25,GSTU25	glutathione S-transferase TAU 25	LOC_Os09g20220.1	glutathione S-transferase, putative, expressed
Sobic.001G166300	ME4	--	--	--	-1.25164	--	1.05257	--	--	-1.35985	--	Flavonol synthase/flavanone 3-hydroxylase GN=FLS OS=Citrus unshiu (Satsuma mandarin) PE=1 SV=1	AT3G19010.1	--	2-oxoglutarate (2OG) and Fe(II)-dependent oxygenase superfamily protein	LOC_Os03g42130.1	gibberellin 20 oxidase 2, putative, expressed
Sobic.001G305600	ME4	-1.25165	-1.39916	-2.59214	-1.42304	--	--	--	-1.71754	--	--	Branched-chain-amino-acid aminotransferase 5, chloroplastic (Precursor) GN=BCAT5 OS=Arabidopsis thaliana (Mouse-ear cress) PE=1 SV=1	AT5G65780.1	ATBCAT-5	branched-chain amino acid aminotransferase 5 / branched-chain amino acid transaminase 5 (BCAT5)	LOC_Os05g48450.1	aminotransferase domain containing protein, putative, expressed
Sobic.001G314300	ME4	-1.21282	-1.04767	--	-2.43923	-1.45376	--	--	--	-1.30492	--	Flavonol synthase/flavanone 3-hydroxylase GN=FLS OS=Citrus unshiu (Satsuma mandarin) PE=1 SV=1	AT5G24530.1	DMR6	2-oxoglutarate (2OG) and Fe(II)-dependent oxygenase superfamily protein	LOC_Os10g39140.1	flavonol synthase/flavanone 3-hydroxylase, putative, expressed
Sobic.001G422300	ME4	--	--	--	--	1.55895	--	--	--	1.29725	--	Laccase-10 (Precursor) GN=OsJ_009911 OS=Oryza sativa subsp. japonica (Rice) PE=2 SV=1	AT5G60020.1	ATLAC17,LAC17	laccase 17	LOC_Os03g16610.1	laccase precursor protein, putative, expressed
Sobic.003G036000	ME4	-1.19482	-2.00057	-3.54384	-2.0085	--	--	-1.18507	-1.64495	--	--	NADP-dependent malic enzyme, chloroplastic (Precursor) GN=MOD1 OS=Zea mays (Maize) PE=1 SV=1	AT1G79750.1	ATNADP-ME4,NADP-ME4	NADP-malic enzyme 4	LOC_Os01g09320.1	NADP-dependent malic enzyme, chloroplast precursor, putative, expressed
Sobic.003G300800	ME4	3.4927	2.53639	--	--	--	3.59871	1.37873	--	--	2.75073	Gibberellin 2-beta-dioxygenase GN=GA2OX1 OS=Phaseolus coccineus (Scarlet runner bean) PE=2 SV=1	AT1G78440.1	ATGA2OX1,GA2OX1	Arabidopsis thaliana gibberellin 2-oxidase 1	LOC_Os01g55240.1	gibberellin 2-beta-dioxygenase, putative, expressed
Sobic.004G053700	ME4	1.11112	1.02426	--	--	--	1.19517	--	--	--	--	4-hydroxyphenylpyruvate dioxygenase OS=Hordeum vulgare (Barley) PE=2 SV=1	AT1G06570.1	HPD,PDS1	phytoene desaturation 1	LOC_Os02g07160.1	glyoxalase family protein, putative, expressed
Sobic.004G225100	ME4	--	--	--	-1.31433	--	--	--	--	-1.3781	--	Bifunctional nitrilase/nitrile hydratase NIT4 OS=Oryza sativa subsp. japonica (Rice) PE=2 SV=1	AT5G22300.1	AtNIT4,NIT4	nitrilase 4	LOC_Os02g42330.1	nitrilase, putative, expressed
Sobic.004G225200	ME4	--	--	--	-1.47466	--	--	--	--	-1.46499	--	Bifunctional nitrilase/nitrile hydratase NIT4 OS=Oryza sativa subsp. japonica (Rice) PE=2 SV=1	AT5G22300.1	AtNIT4,NIT4	nitrilase 4	LOC_Os02g42350.1	nitrilase, putative, expressed
Sobic.005G068700	ME4	-1.82875	-2.09646	-3.13987	-2.07419	--	--	--	-1.52962	-1.38781	--	Probable NAD kinase 2, chloroplastic (Precursor) OS=Oryza sativa subsp. japonica (Rice) PE=2 SV=1	AT1G21640.1	ATNADK2,NADK2	NAD kinase 2	LOC_Os11g08670.1	NAD kinase, putative, expressed
Sobic.006G188200	ME4	--	--	-5.77474	-4.10913	--	--	--	-5.05507	-4.00419	--	Beta-carotene hydroxylase 2, chloroplastic (Precursor; Fragment) GN=CA2 OS=Capsicum annuum (Bell pepper) PE=2 SV=1	AT4G25700.1	B1,BCH1,BETA-OHASE 1,chy1	beta-hydroxylase 1	LOC_Os04g48880.1	fatty acid hydroxylase, putative, expressed
Sobic.006G190100	ME4	--	--	-2.87804	-4.05554	-1.97463	--	--	-2.01247	-3.62742	--	Naringenin,2-oxoglutarate 3-dioxygenase GN=FHT OS=Dianthus caryophyllus (Carnation) PE=2 SV=1	AT4G10500.1	--	2-oxoglutarate (2OG) and Fe(II)-dependent oxygenase superfamily protein	LOC_Os04g49210.1	naringenin,2-oxoglutarate 3-dioxygenase, putative, expressed
Sobic.003G022700	ME5	--	--	--	--	--	-1.27289	--	--	--	--	Gibberellin 2-beta-dioxygenase 1 GN=GA2OX1 OS=Pisum sativum (Garden pea) PE=1 SV=1	AT1G78440.1	ATGA2OX1,GA2OX1	Arabidopsis thaliana gibberellin 2-oxidase 1	LOC_Os01g11150.1	gibberellin 2-beta-dioxygenase, putative, expressed
Sobic.003G047800	ME5	-1.44423	-1.357	--	--	-1.14846	--	--	-1.74008	--	--	UDP-glycosyltransferase 73C5 GN=F13K3.20 OS=Arabidopsis thaliana (Mouse-ear cress) PE=2 SV=1	AT2G36800.1	DOGT1,UGT73C5	don-glucosyltransferase 1	LOC_Os10g09990.1	cytokinin-O-glucosyltransferase 3, putative, expressed
Sobic.004G328800	ME5	--	--	-2.38338	-1.36778	--	--	-1.10074	--	--	--	Anthocyanin 5-aromatic acyltransferase OS=Gentiana triflora (Clustered gentian) PE=1 SV=1	AT5G39080.1	--	HXXXD-type acyl-transferase family protein	LOC_Os07g23150.1	transferase family protein, putative, expressed
Sobic.006G126300	ME5	--	1.05492	1.90927	--	--	--	--	1.6112	1.14788	--	Glucose-6-phosphate 1-dehydrogenase, cytoplasmic isoform GN=G6PDH OS=Solanum tuberosum (Potato) PE=2 SV=1	AT5G40760.1	G6PD6	glucose-6-phosphate dehydrogenase 6	LOC_Os02g38840.1	glucose-6-phosphate 1-dehydrogenase, cytoplasmic isoform, putative, expressed
Sobic.006G136800	ME5	--	--	-1.97364	--	--	--	--	--	-1.19416	--	Shikimate O-hydroxycinnamoyltransferase GN=HST OS=Nicotiana tabacum (Common tobacco) PE=1 SV=1	AT5G48930.1	HCT	hydroxycinnamoyl-CoA shikimate/quinate hydroxycinnamoyl transferase	LOC_Os04g42250.2	transferase family protein, putative, expressed
Sobic.007G089900	ME5	-1.37438	-1.84424	--	-1.42056	-1.16828	-1.01527	-1.65941	-1.49102	--	--	Probable 4-coumarate--CoA ligase 1 GN=OJ1033_B09.16 OS=Oryza sativa subsp. japonica (Rice) PE=2 SV=2	AT3G21240.1	4CL2,AT4CL2	4-coumarate:CoA ligase 2	LOC_Os08g14760.1	AMP-binding domain containing protein, expressed
Sobic.007G142100	ME5	--	--	-4.51652	-2.44855	-1.77481	--	--	-4.02706	-2.43739	--	Shikimate O-hydroxycinnamoyltransferase GN=HST OS=Nicotiana tabacum (Common tobacco) PE=1 SV=1	AT5G48930.1	HCT	hydroxycinnamoyl-CoA shikimate/quinate hydroxycinnamoyl transferase	LOC_Os09g25460.1	transferase family protein, putative, expressed
Sobic.010G276400	ME5	--	--	--	--	-1.20746	--	--	--	-1.51529	--	Phytoene synthase, chloroplastic (Precursor) GN=Y1 OS=Zea mays (Maize) PE=3 SV=1	AT5G17230.1	PSY	PHYTOENE SYNTHASE	LOC_Os06g51290.1	phytoene synthase, chloroplast precursor, putative, expressed
Sobic.001G348900	ME6	--	--	--	--	--	-1.0615	--	--	--	--	Serine carboxypeptidase-like 51 (Precursor) GN=SCPL51 OS=Arabidopsis thaliana (Mouse-ear cress) PE=2 SV=2	AT2G27920.1	SCPL51	serine carboxypeptidase-like 51	LOC_Os03g27590.1	OsSCP18 - Putative Serine Carboxypeptidase homologue, expressed
Sobic.002G175500	ME6	--	--	--	1.75254	--	-1.0848	--	--	1.5994	--	Serine carboxypeptidase-like 17 (Precursor) GN=SCPL17 OS=Arabidopsis thaliana (Mouse-ear cress) PE=2 SV=1	AT3G12203.1	scpl17	serine carboxypeptidase-like 17	LOC_Os10g01110.1	OsSCP44 - Putative Serine Carboxypeptidase homologue, expressed
Sobic.006G227400	ME6	--	--	--	--	--	--	--	--	1.79526	--	Anthocyanidin reductase GN=T13M11.8 OS=Arabidopsis thaliana (Mouse-ear cress) PE=1 SV=2	AT1G61720.1	BAN	NAD(P)-binding Rossmann-fold superfamily protein	LOC_Os04g53920.1	leucoanthocyanidin reductase, putative, expressed
Sobic.008G074400	ME6	-1.06142	-1.0638	--	--	-1.61533	--	--	--	1.54954	--	Glutathione S-transferase GN=GSTZ1 OS=Triticum aestivum (Wheat) PE=1 SV=1	AT2G02380.1	ATGSTZ2,GSTZ2	glutathione S-transferase (class zeta) 2	LOC_Os12g10730.1	glutathione S-transferase, putative, expressed
Sobic.003G357600	ME7	-1.91465	-1.78238	2.23321	1.62834	1.19387	--	--	1.73902	2.10495	--	Laccase-7 (Precursor) OS=Oryza sativa subsp. japonica (Rice) PE=2 SV=1	AT5G05390.1	LAC12	laccase 12	LOC_Os01g63190.1	laccase precursor protein, putative, expressed
Sobic.008G012400	ME8	--	--	--	-1.78312	--	--	--	-1.99011	--	-2.93185	Protein SRG1 GN=SRG1 OS=Arabidopsis thaliana (Mouse-ear cress) PE=2 SV=1	AT1G78550.1	--	2-oxoglutarate (2OG) and Fe(II)-dependent oxygenase superfamily protein	LOC_Os03g32470.1	leucoanthocyanidin dioxygenase, putative, expressed
Sobic.001G066000	ME10	1.23087	1.67983	2.31567	--	--	--	1.16861	--	--	--	Probable glutathione S-transferase GSTU1 OS=Oryza sativa subsp. japonica (Rice) PE=1 SV=1	AT1G53680.1	ATGSTU28,GSTU28	glutathione S-transferase TAU 28	LOC_Os09g20220.1	glutathione S-transferase, putative, expressed
Sobic.003G036300	ME12	--	-1.25432	-2.54269	--	--	--	-1.1596	-1.79142	--	--	S-norcoclaurine synthase 1 GN=NCS1 OS=Coptis japonica (Japanese goldthread) PE=1 SV=1	AT1G35190.1	--	2-oxoglutarate (2OG) and Fe(II)-dependent oxygenase superfamily protein	LOC_Os01g09300.2	oxidoreductase, putative, expressed
Sobic.002G205100	ME13	--	--	--	--	--	-1.18828	--	--	--	--	Shikimate O-hydroxycinnamoyltransferase GN=K19E20.4 OS=Arabidopsis thaliana (Mouse-ear cress) PE=2 SV=1	AT5G48930.1	HCT	hydroxycinnamoyl-CoA shikimate/quinate hydroxycinnamoyl transferase	LOC_Os06g08640.1	transferase family protein, putative, expressed
Sobic.003G342100	ME13	-1.60101	-2.1417	-2.67531	--	--	-1.07567	-1.54804	-1.31401	--	--	Cinnamoyl-CoA reductase 1 GN=T24D18.5 OS=Arabidopsis thaliana (Mouse-ear cress) PE=1 SV=1	AT5G58490.1	--	NAD(P)-binding Rossmann-fold superfamily protein	LOC_Os01g61230.1	dihydroflavonol-4-reductase, putative, expressed
Sobic.006G151600	ME17	--	--	--	--	--	--	--	-1.6626	--	--	UDP-glycosyltransferase 73D1 GN=UGT73D1 OS=Arabidopsis thaliana (Mouse-ear cress) PE=3 SV=1	AT3G53150.1	UGT73D1	UDP-glucosyl transferase 73D1	LOC_Os04g44240.1	cytokinin-O-glucosyltransferase 3, putative, expressed
Sobic.001G065900	--	1.22426	--	1.89351	--	1.95371	--	--	--	--	--	Probable glutathione S-transferase GSTU1 GN=GSTU1 OS=Oryza sativa subsp. indica (Rice) PE=2 SV=1	AT1G17180.1	ATGSTU25,GSTU25	glutathione S-transferase TAU 25	LOC_Os07g28480.1	glutathione S-transferase, putative, expressed
Sobic.001G155300	--	5.20312	3.72736	3.2577	--	--	--	--	--	--	--	9-cis-epoxycarotenoid dioxygenase 1, chloroplastic (Precursor) GN=VP14 OS=Zea mays (Maize) PE=1 SV=2	AT1G78390.1	ATNCED9,NCED9	nine-cis-epoxycarotenoid dioxygenase 9	LOC_Os03g44380.1	9-cis-epoxycarotenoid dioxygenase 1, chloroplast precursor, putative, expressed
Sobic.001G215000	--	3.49028	--	--	--	3.12129	--	--	--	--	--	Stilbene synthase 4 OS=Vitis vinifera (Grape) PE=2 SV=1	AT1G02050.1	LAP6	Chalcone and stilbene synthase family protein	LOC_Os10g34360.1	stilbene synthase, putative, expressed
Sobic.001G248600	--	--	--	-1.98723	-3.54726	-1.77042	--	--	--	-2.86694	--	Ent-copalyl diphosphate synthase 1, chloroplastic (Precursor) GN=P0444A09.11 OS=Oryza sativa subsp. japonica (Rice) PE=2 SV=1	AT4G02780.1	ABC33,ATCPS1,CPS,CPS1,GA1	Terpenoid cyclases/Protein prenyltransferases superfamily protein	LOC_Os02g17780.1	ent-kaurene synthase, chloroplast precursor, putative, expressed
Sobic.002G173900	--	-3.25056	-4.6678	1.98964	-3.03067	-4.09001	-1.76242	-1.67225	2.08784	--	-2.20343	UDP-glycosyltransferase 72B3 GN=UGT72B3 OS=Arabidopsis thaliana (Mouse-ear cress) PE=2 SV=1	AT1G01420.1	UGT72B3	UDP-glucosyl transferase 72B3	LOC_Os01g43280.1	hydroquinone glucosyltransferase, putative, expressed
Sobic.002G176800	--	--	--	3.18944	--	--	--	--	1.95044	--	--	Probable NADH kinase GN=OSJNBb0085I16.26 OS=Oryza sativa subsp. japonica (Rice) PE=2 SV=1	AT1G78590.1	ATNADK-3,NADK3	NAD(H) kinase 3	LOC_Os09g17680.1	NAD kinase, putative, expressed
Sobic.002G186800	--	--	--	-2.47538	--	-4.49477	1.21355	--	--	-1.35906	-5.49387	Strictosidine synthase 3 (Precursor) GN=SS3 OS=Arabidopsis thaliana (Mouse-ear cress) PE=2 SV=2	AT3G57030.1	--	Calcium-dependent phosphotriesterase superfamily protein	LOC_Os09g20810.1	strictosidine synthase, putative, expressed
Sobic.002G361100	--	--	1.47833	--	--	--	--	--	--	--	--	Probable glutathione S-transferase GSTU1 OS=Oryza sativa subsp. japonica (Rice) PE=1 SV=1	AT1G17180.1	ATGSTU25,GSTU25	glutathione S-transferase TAU 25	LOC_Os07g28480.1	glutathione S-transferase, putative, expressed
Sobic.002G369600	--	--	--	--	1.80161	--	--	--	--	1.57899	--	Anthocyanidin 3-O-glucosyltransferase GN=BZ1 OS=Zea mays (Maize) PE=3 SV=1	AT5G17050.1	UGT78D2	UDP-glucosyl transferase 78D2	LOC_Os07g05420.1	anthocyanidin 3-O-glucosyltransferase, putative, expressed
Sobic.003G069200	--	2.93108	--	--	--	--	-1.32892	-2.27442	-2.04487	--	-7.04219	Shikimate O-hydroxycinnamoyltransferase GN=HST OS=Nicotiana tabacum (Common tobacco) PE=1 SV=1	AT5G48930.1	HCT	hydroxycinnamoyl-CoA shikimate/quinate hydroxycinnamoyl transferase	LOC_Os08g43040.1	transferase family protein, putative, expressed
Sobic.003G357500	--	--	--	2.32853	2.2681	--	--	--	--	2.60663	--	Laccase-6 (Precursor) OS=Oryza sativa subsp. japonica (Rice) PE=2 SV=1	AT3G09220.1	LAC7	laccase 7	LOC_Os01g63190.1	laccase precursor protein, putative, expressed
Sobic.004G000700	--	1.45077	1.10057	1.50923	2.56182	3.82289	--	--	--	--	--	Leucoanthocyanidin dioxygenase GN=A2 OS=Zea mays (Maize) PE=2 SV=1	AT4G22880.1	ANS,LDOX,TDS4,TT18	leucoanthocyanidin dioxygenase	LOC_Os01g27490.1	leucoanthocyanidin dioxygenase, putative, expressed
Sobic.004G087100	--	--	--	--	--	--	-1.54176	--	-2.37429	--	--	UDP-glycosyltransferase 73C1 GN=F13K3.15 OS=Arabidopsis thaliana (Mouse-ear cress) PE=2 SV=1	AT2G36750.1	UGT73C1	UDP-glucosyl transferase 73C1	LOC_Os02g11700.1	cytokinin-O-glucosyltransferase 3, putative, expressed
Sobic.004G087200	--	-2.4156	-3.31446	--	--	--	-1.97945	-2.4303	-2.33469	--	--	UDP-glycosyltransferase 73D1 GN=UGT73D1 OS=Arabidopsis thaliana (Mouse-ear cress) PE=3 SV=1	AT2G36750.1	UGT73C1	UDP-glucosyl transferase 73C1	LOC_Os01g08090.1	flavonol-3-O-glycoside-7-O-glucosyltransferase 1, putative, expressed
Sobic.004G220300	--	--	--	-1.79178	--	--	--	--	--	--	--	Phenylalanine ammonia-lyase OS=Oryza sativa subsp. japonica (Rice) PE=1 SV=2	AT3G53260.1	ATPAL2,PAL2	phenylalanine ammonia-lyase 2	LOC_Os02g41630.2	phenylalanine ammonia-lyase, putative, expressed
Sobic.005G088400	--	1.64453	--	--	--	--	--	--	--	--	--	Cytochrome P450 84A1 GN=F23E13.110 OS=Arabidopsis thaliana (Mouse-ear cress) PE=2 SV=1	AT4G36220.1	CYP84A1,FAH1	ferulic acid 5-hydroxylase 1	LOC_Os10g36848.1	cytochrome P450, putative, expressed
Sobic.005G137000	--	--	--	3.55909	--	--	--	--	3.46745	--	--	Chalcone synthase 1 GN=CHS1 OS=Sorghum bicolor (Sorghum) PE=3 SV=1	AT5G13930.1	ATCHS,CHS,TT4	Chalcone and stilbene synthase family protein	LOC_Os11g32650.1	chalcone synthase, putative, expressed
Sobic.006G041700	--	--	--	--	--	--	-2.74087	--	-2.79087	--	--	Momilactone A synthase OS=Oryza sativa subsp. japonica (Rice) PE=2 SV=1	AT1G52340.1	ABA2,ATABA2,ATSDR1,GIN1,ISI4,SDR1,SIS4,SRE1	NAD(P)-binding Rossmann-fold superfamily protein	LOC_Os04g33240.1	sex determination protein tasselseed-2, putative, expressed
Sobic.006G227100	--	--	--	--	--	--	--	--	-2.78688	-2.86672	-4.28978	Anthocyanidin reductase GN=T13M11.8 OS=Arabidopsis thaliana (Mouse-ear cress) PE=1 SV=2	AT1G61720.1	BAN	NAD(P)-binding Rossmann-fold superfamily protein	LOC_Os04g53920.1	leucoanthocyanidin reductase, putative, expressed
Sobic.006G253900	--	--	--	--	1.37022	2.67892	--	--	--	--	--	Naringenin,2-oxoglutarate 3-dioxygenase OS=Hordeum vulgare (Barley) PE=2 SV=1	AT3G51240.1	F3\'H,F3H,TT6	flavanone 3-hydroxylase	LOC_Os04g56700.1	naringenin,2-oxoglutarate 3-dioxygenase, putative, expressed
Sobic.008G053200	--	--	--	-2.12191	-2.13634	--	--	--	--	-1.6033	--	Fructose-bisphosphate aldolase, chloroplastic (Precursor) OS=Oryza sativa subsp. japonica (Rice) PE=1 SV=2	AT4G38970.1	FBA2	fructose-bisphosphate aldolase 2	LOC_Os11g07020.1	fructose-bisphospate aldolase isozyme, putative, expressed
Sobic.008G167100	--	--	--	--	--	--	--	--	-1.86484	--	--	Achilleol B synthase OS=Oryza sativa subsp. japonica (Rice) PE=1 SV=1	AT2G07050.1	CAS1	cycloartenol synthase 1	LOC_Os11g18194.1	cycloartenol synthase, putative, expressed
Sobic.010G178300	--	--	--	--	--	--	--	--	--	--	-2.37011	Aldehyde dehydrogenase family 2 member C4 GN=MOB24.3 OS=Arabidopsis thaliana (Mouse-ear cress) PE=1 SV=2	AT3G24503.1	ALDH1A,ALDH2C4,REF1	aldehyde dehydrogenase 2C4	LOC_Os01g40870.1	aldehyde dehydrogenase, putative, expressed
