# Supplementary material for: Comparative Transcriptome Analysis of Two Sweet Sorghum Genotypes with Different Salt Tolerance Abilities to Reveal the Mechanism of Salt Tolerance
Source: Int J Mol Sci. 2022 Feb 18;23(4):2272. doi: 10.3390/ijms23042272 (PMC8877675; doi:10.3390/ijms23042272)
Supplement: Supplementary file 1 [file ijms-23-02272-s001.zip › TableS4-hormone.xlsx]

## Sheet: Sheet1
Table S4 Differentially expression genes involve in hormone signaling.
Gene	Log2 (FC) in RIO-1h	Log2 (FC) in RIO-2h	Log2 (FC) in RIO-6h	Log2 (FC) in RIO-12h	Log2 (FC) in RIO-24h	Log2 (FC) in SN005-1h	Log2 (FC) in SN005-2h	Log2 (FC) in SN005-6h	Log2 (FC) in SN005-12h	Log2 (FC) in SN005-24h	Swissprot_annotation	Homologous in Arabidopsis thaliana			Homologous in Oryza sativa
Sobic.003G298900	1.49665	--	--	--	1.78181	--	--	--	--	--	Callose synthase 12 OS=Arabidopsis thaliana (Mouse-ear cress) PE=1 SV=1	AT4G03550.1	ATGSL05,ATGSL5,GSL05,GSL5,PMR4	glucan synthase-like 5	LOC_Os01g55040.1	1,3-beta-glucan synthase component, putative, expressed
Sobic.004G000700	1.45077	1.10057	1.50923	2.56182	3.82289	--	--	--	--	--	Leucoanthocyanidin dioxygenase GN=A2 OS=Zea mays (Maize) PE=2 SV=1	AT4G22880.1	ANS,LDOX,TDS4,TT18	leucoanthocyanidin dioxygenase	LOC_Os01g27490.1	leucoanthocyanidin dioxygenase, putative, expressed
Sobic.007G224800	1.44926	--	--	--	--	--	--	-1.82298	--	--	Transcription factor MYB39 GN=dl4925c OS=Arabidopsis thaliana (Mouse-ear cress) PE=2 SV=1	AT1G34670.1	AtMYB93,MYB93	myb domain protein 93	LOC_Os08g37970.1	MYB family transcription factor, putative, expressed
Sobic.006G056400	1.42952	1.87028	--	--	--	--	--	--	--	2.2965	--	AT5G13220.1	JAS1,JAZ10,TIFY9	jasmonate-zim-domain protein 10	LOC_Os04g32480.1	zinc-finger protein, putative, expressed
Sobic.010G062500	1.40393	1.53288	2.33269	--	--	--	--	--	--	--	Probable protein phosphatase 2C 54 OS=Oryza sativa subsp. japonica (Rice) PE=2 SV=1	AT2G25620.1	AtDBP1,DBP1	DNA-binding protein phosphatase 1	LOC_Os06g08140.1	protein phosphatase 2C, putative, expressed
Sobic.009G121900	1.34671	--	--	--	--	--	--	--	--	--	Annexin D4 GN=T6A23.5 OS=Arabidopsis thaliana (Mouse-ear cress) PE=2 SV=1	AT2G38750.1	ANNAT4	annexin 4	LOC_Os05g31750.1	annexin, putative, expressed
Sobic.002G245100	1.33654	--	1.54657	--	--	--	--	--	--	--	Pirin-like protein At1g50590 GN=At1g50590 OS=Arabidopsis thaliana (Mouse-ear cress) PE=2 SV=1	AT1G50590.1	--	RmlC-like cupins superfamily protein	LOC_Os09g31120.1	pirin, putative, expressed
Sobic.002G125700	1.2397	--	-3.23406	-5.4803	--	--	--	-3.55219	-2.88072	--	Aquaporin PIP2-6 GN=PIP2-6 OS=Zea mays (Maize) PE=2 SV=1	AT2G37170.1	PIP2;2,PIP2B	plasma membrane intrinsic protein 2	LOC_Os07g26630.1	aquaporin protein, putative, expressed
Sobic.009G070200	3.43674	--	--	--	--	--	--	--	--	--	Replication factor C subunit 1 GN=RFC1 OS=Oryza sativa subsp. japonica (Rice) PE=2 SV=2
Sobic.006G251800	1.19513	--	--	--	--	--	--	--	--	--	Molybdopterin adenylyltransferase GN=CNX1 OS=Arabidopsis thaliana (Mouse-ear cress) PE=1 SV=2	AT5G20990.1	B73,CHL6,CNX,CNX1,SIR4	molybdopterin biosynthesis CNX1 protein / molybdenum cofactor biosynthesis enzyme CNX1 (CNX1)	LOC_Os04g56620.1	molybdopterin biosynthesis protein CNX1, putative, expressed
Sobic.008G020300	1.15635	--	--	--	--	--	--	--	--	--	Myb-related protein 306 GN=MYB306 OS=Antirrhinum majus (Garden snapdragon) PE=2 SV=1	AT1G08810.1	AtMYB60,MYB60	myb domain protein 60	LOC_Os11g03440.1	myb-like DNA-binding domain containing protein, putative, expressed
Sobic.003G373000	1.07428	--	--	--	--	--	--	--	--	--	Myb-related protein 308 GN=MYB308 OS=Antirrhinum majus (Garden snapdragon) PE=2 SV=1	AT4G09460.1	AtMYB6,MYB6	myb domain protein 6	LOC_Os01g65370.1	MYB family transcription factor, putative, expressed
Sobic.001G077400	1.06249	--	--	--	--	--	--	--	--	--	Allene oxide synthase 1, chloroplastic (Precursor) OS=Oryza sativa subsp. japonica (Rice) PE=2 SV=1	AT5G42650.1	AOS,CYP74A,DDE2	allene oxide synthase	LOC_Os03g55800.1	cytochrome P450, putative, expressed
Sobic.005G020200	1.05401	--	-1.94465	-2.75506	--	--	--	--	--	--	Myb-related protein 306 GN=MYB306 OS=Antirrhinum majus (Garden snapdragon) PE=2 SV=1	AT1G08810.1	AtMYB60,MYB60	myb domain protein 60	LOC_Os11g03440.1	myb-like DNA-binding domain containing protein, putative, expressed
Sobic.003G395400	1.05065	--	1.59958	--	1.44136	--	--	--	--	2.35859	BTB/POZ and TAZ domain-containing protein 1 GN=BT1 OS=Arabidopsis thaliana (Mouse-ear cress) PE=1 SV=1	AT5G63160.1	BT1	BTB and TAZ domain protein 1	LOC_Os01g68020.1	BTBZ2 - Bric-a-Brac, Tramtrack, and Broad Complex BTB domain with TAZ zinc finger and Calmodulin-binding domains, expressed
Sobic.005G137300	1.02995	1.17845	2.63486	--	1.70228	--	--	--	--	--	Chalcone synthase 6 GN=CHS6 OS=Sorghum bicolor (Sorghum) PE=3 SV=1	AT5G13930.1	ATCHS,CHS,TT4	Chalcone and stilbene synthase family protein	LOC_Os11g32650.1	chalcone synthase, putative, expressed
Sobic.001G482700	1.48825	2.12129	1.5845	1.51822	--	--	--	--	--	2.755	Protein TIFY 10A GN=T29M8.5 OS=Arabidopsis thaliana (Mouse-ear cress) PE=1 SV=1	AT1G19180.1	JAZ1,TIFY10A	jasmonate-zim-domain protein 1	LOC_Os03g08320.1	ZIM domain containing protein, putative, expressed
Sobic.002G214800	1.06497	1.18214	1.53251	--	--	--	1.35587	1.6823	--	1.75402	Protein TIFY 10A GN=T29M8.5 OS=Arabidopsis thaliana (Mouse-ear cress) PE=1 SV=1	AT1G19180.1	JAZ1,TIFY10A	jasmonate-zim-domain protein 1	LOC_Os09g26780.1	zinc-finger protein, putative, expressed
Sobic.003G185100	-1.13034	-1.40677	-5.26866	-5.90868	--	--	--	-1.9826	-3.73032	--	Nitrate transporter 1.4 GN=F18A8.6 OS=Arabidopsis thaliana (Mouse-ear cress) PE=1 SV=1	AT2G26690.1	--	Major facilitator superfamily protein	LOC_Os01g37590.1	peptide transporter PTR2, putative, expressed
Sobic.008G094000	-1.14171	--	--	--	--	--	--	--	--	--	Bidirectional sugar transporter SWEET13 GN=OsJ_36063 OS=Oryza sativa subsp. japonica (Rice) PE=2 SV=1	AT5G23660.1	MTN3	homolog of Medicago truncatula MTN3	LOC_Os12g29220.1	nodulin MtN3 family protein, putative, expressed
Sobic.002G165140	-1.15658	-1.4492	--	--	--	--	--	--	--	--	Lipid phosphate phosphatase 2 GN=F9L1.2 OS=Arabidopsis thaliana (Mouse-ear cress) PE=2 SV=1	AT1G15080.1	ATLPP2,ATPAP2,LPP2	lipid phosphate phosphatase 2	LOC_Os09g13870.1	lipid phosphatase protein, putative, expressed
Sobic.003G379700	-1.19327	--	--	--	--	--	--	--	--	--	NAC domain-containing protein 48 OS=Oryza sativa subsp. japonica (Rice) PE=2 SV=1	AT1G01720.1	ANAC002,ATAF1	NAC (No Apical Meristem) domain transcriptional regulator superfamily protein	LOC_Os01g66120.3	No apical meristem protein, putative, expressed
Sobic.002G024000	-1.4633	-1.29626	--	--	-1.73698	--	--	--	--	--	L-type lectin-domain containing receptor kinase IV.1 (Precursor) GN=F13M22.21 OS=Arabidopsis thaliana (Mouse-ear cress) PE=1 SV=1	AT2G37710.1	RLK	receptor lectin kinase	LOC_Os07g03830.1	lectin-like receptor kinase, putative, expressed
Sobic.009G034200	-1.6506	-1.08878	--	-1.71743	--	--	--	--	-1.17374	--	CBL-interacting protein kinase 17 OS=Oryza sativa subsp. japonica (Rice) PE=2 SV=1	AT3G17510.1	CIPK1,SnRK3.16	CBL-interacting protein kinase 1	LOC_Os05g04550.1	CAMK_KIN1/SNF1/Nim1_like.3 - CAMK includes calcium/calmodulin depedent protein kinases, expressed
Sobic.001G223200	-1.74145	--	--	--	-1.81665	--	--	--	--	-2.28628	Peptide transporter PTR3-A GN=PTR3-A OS=Arabidopsis thaliana (Mouse-ear cress) PE=2 SV=1	AT5G46050.1	ATPTR3,PTR3	peptide transporter 3	LOC_Os10g33170.1	POT domain containing peptide transporter, putative, expressed
Sobic.008G147000	-1.79407	-1.30329	2.82194	3.12012	--	--	--	2.48156	3.04194	--	Serine/threonine-protein kinase SAPK9 GN=OOSJNBa0017N12.8 OS=Oryza sativa subsp. japonica (Rice) PE=2 SV=1	AT4G33950.1	ATOST1,OST1,P44,SNRK2-6,SNRK2.6,SRK2E	Protein kinase superfamily protein	LOC_Os12g39630.1	CAMK_CAMK_like.49 - CAMK includes calcium/calmodulin depedent protein kinases, expressed
Sobic.005G017801	-2.05769	-2.71666	--	--	--	--	--	--	--	--	Glutathione transferase GST 23 OS=Zea mays (Maize) PE=2 SV=1	AT2G29420.1	ATGSTU7,GST25,GSTU7	glutathione S-transferase tau 7	LOC_Os09g29200.1	glutathione S-transferase, putative, expressed
Sobic.001G310800	-2.28872	-2.34699	--	--	-2.06633	--	--	--	--	-2.90093	L-type lectin-domain containing receptor kinase IV.2 (Precursor) GN=F5K20.110 OS=Arabidopsis thaliana (Mouse-ear cress) PE=2 SV=1	AT3G53810.1	--	Concanavalin A-like lectin protein kinase family protein	LOC_Os10g38960.1	lectin-like receptor kinase, putative, expressed
Sobic.001G074800	-2.66499	--	--	--	--	--	--	--	--	--	L-type lectin-domain containing receptor kinase IV.1 (Precursor) GN=F13M22.21 OS=Arabidopsis thaliana (Mouse-ear cress) PE=1 SV=1	AT3G53810.1	--	Concanavalin A-like lectin protein kinase family protein	LOC_Os03g15250.1	lectin-like receptor kinase, putative, expressed
Sobic.005G137100	-3.0365	--	1.91521	-4.05737	-2.96004	--	--	--	--	--	Chalcone synthase 3 GN=CHS3 OS=Sorghum bicolor (Sorghum) PE=3 SV=1	AT5G13930.1	ATCHS,CHS,TT4	Chalcone and stilbene synthase family protein	LOC_Os11g32650.1	chalcone synthase, putative, expressed
Sobic.001G268400	-4.0636	--	--	--	--	--	--	--	--	--	26S proteasome non-ATPase regulatory subunit 4 homolog OS=Arabidopsis thaliana (Mouse-ear cress) PE=1 SV=1	AT4G38630.1	ATMCB1,MBP1,MCB1,RPN10	regulatory particle non-ATPase 10	LOC_Os03g13970.1	26S proteasome non-ATPase regulatory subunit 4, putative, expressed
Sobic.002G172000	1.30644	--	--	1.79774	2.12831	--	1.33213	1.46612	2.72399	3.00371	Probable protein phosphatase 2C 68 OS=Oryza sativa subsp. japonica (Rice) PE=2 SV=2	AT2G29380.1	HAI3	highly ABA-induced PP2C gene 3	LOC_Os09g15670.1	protein phosphatase 2C, putative, expressed
Sobic.005G121200	1.21644	--	--	1.49162	3.13429	--	1.06626	--	1.17471	2.521	Protein HVA22 GN=HVA22 OS=Hordeum vulgare (Barley) PE=2 SV=1	AT5G50720.1	ATHVA22E,HVA22E	HVA22 homologue E	LOC_Os11g30500.1	HVA22, putative, expressed
Sobic.010G178500	2.35019	2.31338	--	--	4.54193	--	2.32882	--	--	4.84144	Multiprotein-bridging factor 1c GN=MBF1C OS=Arabidopsis thaliana (Mouse-ear cress) PE=1 SV=1	AT3G24500.1	ATMBF1C,MBF1C	multiprotein bridging factor 1C	LOC_Os06g39240.1	endothelial differentiation-related factor 1, putative, expressed
Sobic.002G386400	1.03941	1.43893	3.27266	2.10033	-1.6486	--	1.22186	2.74442	2.16474	--	Ribonucleoprotein At2g37220, chloroplastic (Precursor) GN=At2g37220 OS=Arabidopsis thaliana (Mouse-ear cress) PE=1 SV=1	AT3G53460.2	CP29	chloroplast RNA-binding protein 29	LOC_Os07g43810.1	RNA recognition motif containing protein, putative, expressed
Sobic.005G231500	-1.02609	-1.7634	-4.89372	-2.9606	--	--	-1.3375	-3.24337	-2.47109	--	Ribulose bisphosphate carboxylase/oxygenase activase, chloroplastic (Precursor) GN=RCA1 OS=Zea mays (Maize) PE=2 SV=3	AT2G39730.2	RCA	rubisco activase	LOC_Os11g47970.1	AAA-type ATPase family protein, putative, expressed
Sobic.001G403300	-1.07817	--	-1.92059	-2.17356	-1.9659	--	-1.93713	-1.84536	-2.2744	-1.58855	Abscisic acid receptor PYL4 GN=T19C21.20 OS=Arabidopsis thaliana (Mouse-ear cress) PE=1 SV=1	AT5G05440.1	PYL5,RCAR8	Polyketide cyclase/dehydrase and lipid transport superfamily protein	LOC_Os03g18600.1	cyclase/dehydrase family protein, putative, expressed
Sobic.007G226600	-1.14133	--	--	--	-1.24091	--	-1.07696	--	--	--	Homeobox-leucine zipper protein HOX4 GN=OJ1595_D08.21 OS=Oryza sativa subsp. japonica (Rice) PE=1 SV=1	AT4G40060.1	ATHB-16,ATHB16,HB16	homeobox protein 16	LOC_Os09g29460.1	homeobox associated leucine zipper, putative, expressed
Sobic.003G223400	-1.17211	-1.53463	--	-1.76316	-1.37484	--	-1.27868	--	--	--	MYB-like transcription factor ETC3 GN=F2N1.40 OS=Arabidopsis thaliana (Mouse-ear cress) PE=2 SV=1	AT4G01060.1	CPL3,ETC3	CAPRICE-like MYB3	LOC_Os01g43230.2	expressed protein
Sobic.003G358800	-1.46917	-1.27209	--	--	-1.63228	--	-1.49063	--	--	--	Calmodulin-binding receptor-like cytoplasmic kinase 1 GN=CRCK1 OS=Arabidopsis thaliana (Mouse-ear cress) PE=1 SV=1	AT5G58940.1	CRCK1	calmodulin-binding receptor-like cytoplasmic kinase 1	LOC_Os01g63280.2	tyrosine protein kinase domain containing protein, putative, expressed
Sobic.001G234800	-1.58711	-1.70259	--	--	--	--	-1.01599	--	--	--	Probable inorganic phosphate transporter 1-8 OS=Oryza sativa subsp. japonica (Rice) PE=2 SV=1	AT2G38940.1	ATPT2,PHT1;4	phosphate transporter 1;4	LOC_Os10g30790.1	inorganic phosphate transporter, putative, expressed
Sobic.002G390100	-1.89038	-2.26932	-2.62429	-2.85155	--	--	-1.36517	-1.9806	-2.37434	--	CBL-interacting protein kinase 21 GN=OJ1136_D11.123 OS=Oryza sativa subsp. japonica (Rice) PE=2 SV=2	AT3G17510.1	CIPK1,SnRK3.16	CBL-interacting protein kinase 1	LOC_Os07g44290.1	CAMK_KIN1/SNF1/Nim1_like.29 - CAMK includes calcium/calmodulin depedent protein kinases, expressed
Sobic.010G084600	1.97936	2.28053	1.67893	-1.88502	--	2.83346	1.83055	--	--	1.5077	12-oxophytodienoate reductase 1 OS=Oryza sativa subsp. japonica (Rice) PE=2 SV=1	AT1G76690.1	ATOPR2,OPR2	12-oxophytodienoate reductase 2	LOC_Os06g11290.1	12-oxophytodienoate reductase, putative, expressed
Sobic.006G095600	2.18363	1.19872	--	--	--	1.34203	1.07712	--	--	--	Putative lipoxygenase 5 GN=OSJNBa0064H22.1 OS=Oryza sativa subsp. japonica (Rice) PE=3 SV=2	AT1G17420.1	LOX3	lipoxygenase 3	LOC_Os03g08220.1	lipoxygenase protein, putative, expressed
Sobic.010G183600	2.70981	2.63651	--	--	--	2.72988	2.84176	--	--	--	Transcription factor HY5 GN=F2I11_150 OS=Arabidopsis thaliana (Mouse-ear cress) PE=1 SV=1	AT5G11260.1	HY5,TED 5	Basic-leucine zipper (bZIP) transcription factor family protein	LOC_Os02g10860.1	bZIP transcription factor domain containing protein, expressed
Sobic.001G424400	2.41405	--	2.15673	3.82589	4.76641	1.23235	1.88926	2.70573	3.87014	4.46558	Probable protein phosphatase 2C 30 OS=Oryza sativa subsp. japonica (Rice) PE=2 SV=1	AT1G07430.1	HAI2	highly ABA-induced PP2C gene 2	LOC_Os03g16170.1	protein phosphatase 2C, putative, expressed
Sobic.003G385500	2.2986	1.83006	--	--	--	1.37364	2.9918	--	--	--	Linoleate 9S-lipoxygenase 2 GN=OSJNBa0057G07.15 OS=Oryza sativa subsp. japonica (Rice) PE=2 SV=2	AT1G55020.1	ATLOX1,LOX1	lipoxygenase 1	LOC_Os03g52860.1	lipoxygenase, putative, expressed
Sobic.001G445900	1.69581	1.45487	1.55499	--	--	2.23434	1.71206	1.35429	--	--	Cytochrome P450 90B1 GN=T3A5.40 OS=Arabidopsis thaliana (Mouse-ear cress) PE=1 SV=2	AT3G50660.1	CLM,CYP90B1,DWF4,PSC1,SAV1,SNP2	Cytochrome P450 superfamily protein	LOC_Os03g12660.1	cytochrome P450, putative, expressed
Sobic.001G051600	1.65645	2.66524	--	--	2.50083	1.02177	1.51771	1.38725	--	3.28289	26S protease regulatory subunit 10B homolog A GN=RPT4A OS=Arabidopsis thaliana (Mouse-ear cress) PE=1 SV=1	AT5G40010.1	AATP1	AAA-ATPase 1	LOC_Os03g58790.1	ATPase, putative, expressed
Sobic.004G085600	1.57734	1.313	-1.57822	-1.56863	-1.25265	1.48962	1.03694	-2.73681	-2.18183	--	Transcription factor HY5 GN=F2I11_150 OS=Arabidopsis thaliana (Mouse-ear cress) PE=1 SV=1	AT5G11260.1	HY5,TED 5	Basic-leucine zipper (bZIP) transcription factor family protein	LOC_Os02g10860.1	bZIP transcription factor domain containing protein, expressed
Sobic.002G080100	1.56488	1.38886	3.24211	--	--	1.7184	--	2.35987	1.15756	--	NAC domain-containing protein 67 OS=Oryza sativa subsp. japonica (Rice) PE=2 SV=1	AT5G63790.1	ANAC102,NAC102	NAC domain containing protein 102	LOC_Os07g12340.1	NAC domain-containing protein 67, putative, expressed
Sobic.010G201388	1.26131	--	--	--	--	1.43659	--	--	--	--	Transcription factor MYB44 GN=K8K14.2 OS=Arabidopsis thaliana (Mouse-ear cress) PE=2 SV=1	AT4G37260.1	ATMYB73,MYB73	myb domain protein 73	LOC_Os06g43090.1	MYB transcription factor TaMYB1, putative, expressed
Sobic.001G449700	1.25375	--	--	--	--	1.0222	--	--	-1.36995	--	Allene oxide synthase 2 GN=OSJNBa0081P02.18 OS=Oryza sativa subsp. japonica (Rice) PE=2 SV=2	AT5G42650.1	AOS,CYP74A,DDE2	allene oxide synthase	LOC_Os03g12500.1	cytochrome P450, putative, expressed
Sobic.003G354000	1.45421	--	--	1.22217	1.26423	1.36304	1.2314	--	1.96532	2.29362	Probable protein phosphatase 2C 9 OS=Oryza sativa subsp. japonica (Rice) PE=2 SV=1	AT1G07430.1	HAI2	highly ABA-induced PP2C gene 2	LOC_Os01g62760.1	protein phosphatase 2C, putative, expressed
Sobic.008G137500	-1.10803	-6.65707	-5.93084	-6.44588	--	7.28326	6.76928	6.23284	4.19159	--	Protein rough sheath 2 GN=RS2 OS=Zea mays (Maize) PE=1 SV=1	AT2G37630.1	AS1,ATMYB91,ATPHAN,MYB91	myb-like HTH transcriptional regulator family protein	LOC_Os12g38400.2	MYB family transcription factor, putative, expressed
Sobic.007G058900	-1.13062	-2.41938	-2.97721	-3.75602	-2.54928	-1.32418	-1.64966	-2.04018	-1.89334	--	Chalcone synthase 1 OS=Oryza sativa subsp. japonica (Rice) PE=2 SV=1	AT5G13930.1	ATCHS,CHS,TT4	Chalcone and stilbene synthase family protein	LOC_Os11g32650.1	chalcone synthase, putative, expressed
Sobic.008G115500	-1.12303	--	--	--	--	-1.31596	--	--	--	--	Syntaxin-132 GN=SYP132 OS=Arabidopsis thaliana (Mouse-ear cress) PE=1 SV=1	AT3G03800.1	ATSYP131,SYP131	syntaxin of plants 131	LOC_Os06g07200.1	syntaxin, putative, expressed
Sobic.007G054100	-1.37447	-1.23802	--	--	--	-1.07134	-1.54643	--	--	--	Vegetative cell wall protein gp1 (Precursor) GN=GP1 OS=Chlamydomonas reinhardtii (Chlamydomonas smithii) PE=2 SV=1	AT5G17640.1	--	Protein of unknown function (DUF1005)	LOC_Os08g06640.1	stress-induced protein, putative, expressed
Sobic.002G327700	-2.21051	-2.47662	--	--	--	-1.96182	-1.44707	--	--	--	Cysteine-rich receptor-like protein kinase 10 (Precursor) GN=F21P8.70 OS=Arabidopsis thaliana (Mouse-ear cress) PE=1 SV=3	AT4G23310.1	CRK23	cysteine-rich RLK (RECEPTOR-like protein kinase) 23	LOC_Os07g35370.1	TKL_IRAK_DUF26-lc.15 - DUF26 kinases have homology to DUF26 containing loci, expressed
Sobic.001G454100	-2.3147	-3.19463	--	-1.5137	-1.72799	-1.80419	-1.28632	--	--	--	Sugar transport protein 13 GN=F9D12.17 OS=Arabidopsis thaliana (Mouse-ear cress) PE=1 SV=2	AT5G26340.1	ATSTP13,MSS1,STP13	Major facilitator superfamily protein	LOC_Os03g11900.1	transporter family protein, putative, expressed
Sobic.001G071700	--	--	--	--	-1.14121	1.04366	--	--	--	--	Proline-rich receptor-like protein kinase PERK4 GN=PERK4 OS=Arabidopsis thaliana (Mouse-ear cress) PE=1 SV=1	AT2G18470.1	PERK4	roline-rich extensin-like receptor kinase 4	LOC_Os03g56470.1	protein kinase family protein, putative, expressed
Sobic.001G141300	--	1.20376	4.14666	2.6226	--	1.21653	1.99768	2.92898	2.86595	--	Glycine-rich RNA-binding protein 2 GN=GRP2 OS=Sorghum bicolor (Sorghum) PE=2 SV=1	AT4G39260.3	ATGRP8,CCR1,GR-RBP8,GRP8	cold, circadian rhythm, and RNA binding 1	LOC_Os12g43600.1	RNA recognition motif containing protein, expressed
Sobic.003G034400	--	--	--	--	--	2.55399	2.14566	2.21022	-4.00302	-3.74124	Zinc finger CCCH domain-containing protein 2 OS=Oryza sativa subsp. japonica (Rice) PE=2 SV=1	AT4G29190.1	--	Zinc finger C-x8-C-x5-C-x3-H type family protein	LOC_Os01g09620.1	zinc finger/CCCH transcription factor, putative, expressed
Sobic.003G361100	--	--	--	--	--	1.64096	--	--	-1.23157	-1.78457	Nematode resistance protein-like HSPRO1 GN=HSPRO1 OS=Arabidopsis thaliana (Mouse-ear cress) PE=1 SV=1	AT2G40000.1	ATHSPRO2,HSPRO2	ortholog of sugar beet HS1 PRO-1 2	LOC_Os01g63690.1	hs1, putative, expressed
Sobic.003G423600	--	--	--	--	-2.18344	1.35764	--	--	-1.42391	-3.75043	Serine/threonine-protein kinase TIO GN=F14I3.15 OS=Arabidopsis thaliana (Mouse-ear cress) PE=1 SV=1	AT1G50240.2	FU	Protein kinase family protein with ARM repeat domain	LOC_Os12g24550.1	expressed protein
Sobic.005G004500	--	1.13829	--	-1.98487	--	1.41041	1.02651	--	--	--	Ferritin-1, chloroplastic (Precursor) GN=FER1 OS=Zea mays (Maize) PE=1 SV=2	AT2G40300.1	ATFER4,FER4	ferritin 4	LOC_Os12g01530.2	ferritin-1, chloroplast precursor, putative, expressed
Sobic.007G177100	--	--	2.00023	--	--	1.60565	1.29026	--	--	--	Myb-related protein Zm38 OS=Zea mays (Maize) PE=2 SV=1	AT4G34990.1	AtMYB32,MYB32	myb domain protein 32	LOC_Os08g43550.1	MYB family transcription factor, putative, expressed
Sobic.007G187800	--	1.25227	3.29162	--	--	1.57411	1.77803	3.74355	1.35193	--	Arginine/serine-rich protein 45 GN=F19K19.9 OS=Arabidopsis thaliana (Mouse-ear cress) PE=1 SV=1	AT5G61820.1	--	--	LOC_Os08g42590.1	mtN19, putative, expressed
Sobic.009G072700	--	--	--	--	--	1.25346	--	--	1.185	1.52837	Diacylglycerol O-acyltransferase 1 GN=F3P11.5 OS=Arabidopsis thaliana (Mouse-ear cress) PE=1 SV=2	AT2G19450.1	ABX45,AS11,ATDGAT,DGAT1,RDS1,TAG1	membrane bound O-acyl transferase (MBOAT) family protein	LOC_Os05g10810.1	O-acyltransferase, putative, expressed
Sobic.008G038200	--	--	--	--	--	1.58805	--	1.68575	-5.14414	1.5851	Putative receptor protein kinase CRINKLY4 (Precursor) GN=CR4 OS=Zea mays (Maize) PE=2 SV=1	AT3G59420.1	ACR4,CR4	crinkly4	LOC_Os03g43670.1	TKL_IRAK_CR4L.1 - The CR4L subfamily has homology with Crinkly4, expressed
Sobic.006G245500	--	--	--	--	--	1.38419	--	--	--	--	AP2-like ethylene-responsive transcription factor AIL5 GN=AIL5 OS=Arabidopsis thaliana (Mouse-ear cress) PE=2 SV=2	AT5G57390.1	AIL5,CHO1,EMK	AINTEGUMENTA-like 5	LOC_Os04g55970.2	AP2-like ethylene-responsive transcription factor AINTEGUMENTA, putative, expressed
Sobic.001G075000	--	--	--	--	--	-1.04649	--	--	--	--	L-type lectin-domain containing receptor kinase IV.1 (Precursor) GN=F13M22.21 OS=Arabidopsis thaliana (Mouse-ear cress) PE=1 SV=1	AT2G37710.1	RLK	receptor lectin kinase	LOC_Os07g03830.1	lectin-like receptor kinase, putative, expressed
Sobic.001G237000	--	--	--	--	--	-1.23371	--	--	--	2.05621	L-type lectin-domain containing receptor kinase IV.1 (Precursor) GN=F13M22.21 OS=Arabidopsis thaliana (Mouse-ear cress) PE=1 SV=1	AT2G37710.1	RLK	receptor lectin kinase	LOC_Os10g30540.1	lectin-like receptor kinase, putative, expressed
Sobic.002G350800	--	--	--	--	--	-1.72552	--	--	1.32023	--	L-type lectin-domain containing receptor kinase IV.1 (Precursor) GN=F13M22.21 OS=Arabidopsis thaliana (Mouse-ear cress) PE=1 SV=1	AT2G37710.1	RLK	receptor lectin kinase	LOC_Os07g38800.1	lectin-like receptor kinase, putative, expressed
Sobic.004G132400	--	-1.41473	--	--	-1.60103	-1.27815	--	--	--	--	L-type lectin-domain containing receptor kinase IV.2 (Precursor) GN=F5K20.110 OS=Arabidopsis thaliana (Mouse-ear cress) PE=2 SV=1	AT3G53810.1	--	Concanavalin A-like lectin protein kinase family protein	LOC_Os02g19530.1	lectin-like receptor kinase, putative, expressed
Sobic.004G222000	--	--	-2.4777	--	1.5063	-1.69835	--	-3.30666	--	--	Aquaporin PIP2-4 GN=PIP2-4 OS=Zea mays (Maize) PE=1 SV=1	AT2G37170.1	PIP2;2,PIP2B	plasma membrane intrinsic protein 2	LOC_Os02g41860.2	aquaporin protein, putative, expressed
Sobic.006G027300	--	--	-2.25832	-6.71983	1.40624	-1.52195	--	-2.40404	-4.68354	--	Probable inorganic phosphate transporter 1-5 OS=Oryza sativa subsp. japonica (Rice) PE=2 SV=2	AT2G32830.1	PHT1;5,PHT5	phosphate transporter 1;5	LOC_Os04g10690.1	inorganic phosphate transporter, putative, expressed
Sobic.006G018400	--	--	--	--	6.56179	--	3.01212	--	2.80767	5.93406	Probable protein phosphatase 2C 37 GN=OSJNBb0089K06.2 OS=Oryza sativa subsp. japonica (Rice) PE=2 SV=2	AT5G57050.1	ABI2,AtABI2	Protein phosphatase 2C family protein	LOC_Os01g40094.1	protein phosphatase 2C, putative, expressed
Sobic.003G015000	--	-1.1583	--	-1.29032	--	--	-1.1243	--	--	--	Probable indole-3-acetic acid-amido synthetase GH3.5 GN=OSJNBa0009C07.16 OS=Oryza sativa subsp. japonica (Rice) PE=2 SV=1	AT2G46370.4	FIN219,JAR1	Auxin-responsive GH3 family protein	LOC_Os01g12160.1	OsGH3.3 - Probable indole-3-acetic acid-amido synthetase, expressed
Sobic.003G385100	--	--	-3.61003	-1.98309	--	--	-1.21879	-3.40582	-1.31632	--	BTB/POZ and TAZ domain-containing protein 3 GN=BT3 OS=Arabidopsis thaliana (Mouse-ear cress) PE=1 SV=2	AT5G67480.2	ATBT4,BT4	BTB and TAZ domain protein 4	LOC_Os01g66890.1	BTBZ1 - Bric-a-Brac, Tramtrack, and Broad Complex BTB domain with TAZ zinc finger and Calmodulin-binding domains, expressed
Sobic.001G409700	--	--	-1.56993	--	-1.26407	--	-1.4433	-1.41737	--	-4.03078	Heterogeneous nuclear ribonucleoprotein 1 GN=RNP1 OS=Arabidopsis thaliana (Mouse-ear cress) PE=1 SV=1	AT3G54770.1	--	RNA-binding (RRM/RBD/RNP motifs) family protein	LOC_Os03g17760.1	RNA recognition motif containing protein, putative, expressed
Sobic.001G074900	--	--	--	--	--	--	--	--	2.79291	--	L-type lectin-domain containing receptor kinase IV.1 (Precursor) GN=F13M22.21 OS=Arabidopsis thaliana (Mouse-ear cress) PE=1 SV=1	AT3G53810.1	--	Concanavalin A-like lectin protein kinase family protein	LOC_Os04g44910.1	receptor like protein kinase, putative, expressed
Sobic.001G094800	--	--	--	--	--	--	--	-1.69235	--	-1.57843	Auxin-responsive protein IAA13 OS=Oryza sativa subsp. japonica (Rice) PE=2 SV=1	AT3G04730.1	IAA16	indoleacetic acid-induced protein 16	LOC_Os03g53150.1	OsIAA13 - Auxin-responsive Aux/IAA gene family member, expressed
Sobic.001G120900	--	--	--	-1.23201	--	--	--	--	-1.4153	-1.70304	DELLA protein DWARF8 GN=D8 OS=Zea mays (Maize) PE=1 SV=1	AT1G14920.1	GAI,RGA2	GRAS family transcription factor family protein	LOC_Os03g49990.1	GRAS family transcription factor domain containing protein, expressed
Sobic.001G125800	--	--	-1.94612	--	--	--	--	--	--	--	Probable linoleate 9S-lipoxygenase 4 OS=Oryza sativa subsp. japonica (Rice) PE=2 SV=1	AT3G22400.1	LOX5	PLAT/LH2 domain-containing lipoxygenase family protein	LOC_Os03g49380.1	lipoxygenase, putative, expressed
Sobic.001G145200	--	--	--	--	--	--	--	--	--	-2.16998	Type I inositol 1,4,5-trisphosphate 5-phosphatase CVP2 GN=CVP2 OS=Arabidopsis thaliana (Mouse-ear cress) PE=1 SV=2	AT2G32010.1	CVL1	CVP2 like 1	LOC_Os03g46090.1	endonuclease/exonuclease/phosphatase family domain containing protein, expressed
Sobic.001G162700	--	--	--	--	3.38844	--	--	-2.39957	--	2.83105	Type I inositol 1,4,5-trisphosphate 5-phosphatase 11 GN=At1g47510 OS=Arabidopsis thaliana (Mouse-ear cress) PE=2 SV=1	AT1G47510.1	5PTASE11,AT5PTASE11	inositol polyphosphate 5-phosphatase 11	LOC_Os03g42810.1	endonuclease/exonuclease/phosphatase family domain containing protein, expressed
Sobic.001G196800	--	--	--	--	--	--	--	--	--	-3.18708	CDPK-related kinase 3 GN=T3A4.8 OS=Arabidopsis thaliana (Mouse-ear cress) PE=1 SV=1	AT2G46700.1	ATCRK3,CRK3	CDPK-related kinase 3	LOC_Os10g36710.1	CAMK_CAMK_like.40 - CAMK includes calcium/calmodulin depedent protein kinases, expressed
Sobic.001G219200	--	--	2.07815	--	--	--	--	--	--	--	Myb-related protein Myb4 GN=OSJNBa0073E02.6 OS=Oryza sativa subsp. japonica (Rice) PE=2 SV=2	AT3G23250.1	ATMYB15,ATY19,MYB15	myb domain protein 15	LOC_Os10g33810.1	myb-related protein Myb4, putative, expressed
Sobic.001G289100	--	--	--	--	--	--	--	--	-1.66424	-2.12026	Abscisic acid receptor PYL1 GN=MZA15.21 OS=Arabidopsis thaliana (Mouse-ear cress) PE=1 SV=1	AT4G17870.1	PYR1,RCAR11	Polyketide cyclase/dehydrase and lipid transport superfamily protein	LOC_Os10g42280.1	cyclase/dehydrase family protein, putative, expressed
Sobic.001G297500	--	--	-2.4723	-1.68027	--	--	--	-1.58287	-1.17393	--	Transcription factor MYB1R1 OS=Solanum tuberosum (Potato) PE=2 SV=1	AT5G47390.1	--	myb-like transcription factor family protein	LOC_Os10g41200.1	MYB family transcription factor, putative, expressed
Sobic.001G310700	--	--	--	--	--	--	--	--	--	1.57095	Probable serine/threonine-protein kinase At4g35230 GN=At4g35230 OS=Arabidopsis thaliana (Mouse-ear cress) PE=1 SV=1	AT4G35230.1	BSK1	BR-signaling kinase 1	LOC_Os03g04050.1	protein kinase family protein, putative, expressed
Sobic.001G357200	--	--	--	--	-1.96981	--	--	--	--	-1.86662	Ribonucleoprotein At2g37220, chloroplastic (Precursor) GN=At2g37220 OS=Arabidopsis thaliana (Mouse-ear cress) PE=1 SV=1	AT2G37220.1	--	RNA-binding (RRM/RBD/RNP motifs) family protein	LOC_Os03g25960.1	RNA recognition motif containing protein, putative, expressed
Sobic.001G361900	--	-1.02455	-1.6665	--	--	--	--	--	--	--	26S protease regulatory subunit 6B homolog OS=Helianthus annuus (Common sunflower) PE=1 SV=1	AT5G40010.1	AATP1	AAA-ATPase 1	LOC_Os03g58790.1	ATPase, putative, expressed
Sobic.001G391300	--	--	-2.44313	-1.90129	--	--	--	-2.86985	-2.20167	--	Galactinol synthase 2 GN=GOLS2 OS=Solanum lycopersicum (Tomato) PE=2 SV=1	AT2G47180.1	AtGolS1,GolS1	galactinol synthase 1	LOC_Os03g20120.1	glycosyl transferase 8 domain containing protein, putative, expressed
Sobic.001G406300	--	--	--	--	--	--	--	--	-1.21528	--	Probable protein phosphatase 2C 32 OS=Oryza sativa subsp. japonica (Rice) PE=2 SV=1	AT2G30020.1	--	Protein phosphatase 2C family protein	LOC_Os03g18150.1	protein phosphatase 2C, putative, expressed
Sobic.001G409500	--	--	1.98271	--	--	--	--	--	--	--	Guanine nucleotide-binding protein subunit beta-like protein GN=GBLP OS=Chlamydomonas reinhardtii (Chlamydomonas smithii) PE=1 SV=1	AT3G45620.1	--	Transducin/WD40 repeat-like superfamily protein	LOC_Os03g17780.1	WD domain, G-beta repeat domain containing protein, expressed
Sobic.001G501600	--	--	--	--	--	--	--	--	--	-1.92473	Tyramine N-feruloyltransferase 4/11 GN=THT11 OS=Nicotiana tabacum (Common tobacco) PE=2 SV=1	AT2G39020.1	--	Acyl-CoA N-acyltransferases (NAT) superfamily protein	LOC_Os03g05710.1	acetyltransferase, GNAT family, putative, expressed
Sobic.001G517700	--	--	-1.83142	-3.42224	--	--	--	--	-2.77782	--	Catalase isozyme 2 GN=CAT2 OS=Zea mays (Maize) PE=2 SV=3	AT4G35090.1	CAT2	catalase 2	LOC_Os03g03910.1	catalase domain containing protein, expressed
Sobic.002G025700	--	--	2.28723	1.39975	--	--	--	2.19436	1.33511	1.69497	L-type lectin-domain containing receptor kinase IV.1 (Precursor) GN=F13M22.21 OS=Arabidopsis thaliana (Mouse-ear cress) PE=1 SV=1	AT2G37710.1	RLK	receptor lectin kinase	LOC_Os07g03880.1	lectin-like receptor kinase, putative, expressed
Sobic.002G032500	--	--	--	--	--	--	--	--	-1.44205	-3.60313	Probable LRR receptor-like serine/threonine-protein kinase At4g20940 GN=At4g20940 OS=Arabidopsis thaliana (Mouse-ear cress) PE=1 SV=1	AT4G20940.1	--	Leucine-rich receptor-like protein kinase family protein	LOC_Os07g05190.1	leucine-rich repeat family protein, putative, expressed
Sobic.002G034700	--	--	--	--	--	--	--	1.67723	--	--	CBL-interacting protein kinase 23 GN=OJ1027_G06.32 OS=Oryza sativa subsp. japonica (Rice) PE=2 SV=1	AT1G30270.1	ATCIPK23,CIPK23,LKS1,SnRK3.23	CBL-interacting protein kinase 23	LOC_Os07g05620.2	CAMK_KIN1/SNF1/Nim1_like.28 - CAMK includes calcium/calmodulin depedent protein kinases, expressed
Sobic.002G046900	--	--	--	--	--	--	--	--	-1.11206	--	Formin-like protein 15 (Precursor) GN=OSJNBb0034B12.29 OS=Oryza sativa subsp. japonica (Rice) PE=2 SV=1	AT2G23840.1	--	HNH endonuclease	LOC_Os07g07480.1	HNH endonuclease domain-containing protein, putative, expressed
Sobic.002G107900	--	--	--	--	4.61315	--	--	--	--	5.78674	L-type lectin-domain containing receptor kinase IV.1 (Precursor) GN=F13M22.21 OS=Arabidopsis thaliana (Mouse-ear cress) PE=1 SV=1	AT3G53810.1	--	Concanavalin A-like lectin protein kinase family protein	LOC_Os07g18240.1	lectin-like receptor kinase, putative, expressed
Sobic.002G109500	--	--	--	5.28943	--	--	--	--	3.48279	--	Putative lipid-transfer protein DIR1 (Precursor) GN=DIR1 OS=Arabidopsis thaliana (Mouse-ear cress) PE=1 SV=1	AT5G48485.1	DIR1	Bifunctional inhibitor/lipid-transfer protein/seed storage 2S albumin superfamily protein	LOC_Os07g18990.1	LTPL40 - Protease inhibitor/seed storage/LTP family protein precursor, expressed
Sobic.002G124700	--	--	-2.16298	--	--	--	--	-2.07461	-1.52908	--	Aquaporin PIP2-1 GN=PIP2-1 OS=Zea mays (Maize) PE=1 SV=2	AT2G37170.1	PIP2;2,PIP2B	plasma membrane intrinsic protein 2	LOC_Os07g26690.1	aquaporin protein, putative, expressed
Sobic.002G125000	--	--	--	--	2.41392	--	--	--	--	--	Aquaporin PIP2-6 GN=PIP2-6 OS=Zea mays (Maize) PE=2 SV=1	AT2G37170.1	PIP2;2,PIP2B	plasma membrane intrinsic protein 2	LOC_Os07g26630.1	aquaporin protein, putative, expressed
Sobic.002G125300	--	--	--	-2.07971	--	--	--	--	--	--	Aquaporin PIP2-6 GN=PIP2-6 OS=Zea mays (Maize) PE=2 SV=1	AT2G37170.1	PIP2;2,PIP2B	plasma membrane intrinsic protein 2	LOC_Os07g26630.1	aquaporin protein, putative, expressed
Sobic.002G192000	--	--	2.27519	--	--	--	--	--	--	--	Zinc finger AN1 domain-containing stress-associated protein 17 GN=OSJNBa0048A13.10 OS=Oryza sativa subsp. japonica (Rice) PE=2 SV=1	AT3G28210.1	PMZ,SAP12	zinc finger (AN1-like) family protein	LOC_Os09g21710.1	AN1-like zinc finger domain containing protein, expressed
Sobic.002G199500	--	--	--	--	--	--	--	1.97083	--	--	Probable calcium-binding protein CML30 GN=CML30 OS=Arabidopsis thaliana (Mouse-ear cress) PE=2 SV=1	AT3G29000.1	--	Calcium-binding EF-hand family protein	LOC_Os09g24580.1	EF hand family protein, putative, expressed
Sobic.002G201000	--	-1.14425	-1.68562	--	-1.18627	--	--	-1.79466	--	--	Myb-related protein 306 GN=MYB306 OS=Antirrhinum majus (Garden snapdragon) PE=2 SV=1	AT3G28910.1	ATMYB30,MYB30	myb domain protein 30	LOC_Os08g33940.1	MYB family transcription factor, putative, expressed
Sobic.002G206200	--	-1.30052	-2.3003	-1.33184	--	--	--	-1.38953	-1.14343	--	Probable monogalactosyldiacylglycerol synthase 1, chloroplastic (Precursor) OS=Oryza sativa subsp. japonica (Rice) PE=2 SV=1	AT4G31780.2	MGD1,MGDA	monogalactosyl diacylglycerol synthase 1	LOC_Os09g25580.1	monogalactosyldiacylglycerol synthase, putative, expressed
Sobic.002G206400	--	--	-1.82784	-1.82789	--	--	--	-1.80918	--	--	AP2-like ethylene-responsive transcription factor At1g16060 GN=At1g16060 OS=Arabidopsis thaliana (Mouse-ear cress) PE=2 SV=1	AT1G16060.1	ADAP	ARIA-interacting double AP2 domain protein	LOC_Os06g05340.1	AP2 domain containing protein, expressed
Sobic.002G215700	--	--	--	--	1.20813	--	--	--	1.15662	2.2008	Aldehyde dehydrogenase family 7 member A1 OS=Malus domestica (Apple) PE=1 SV=3	AT1G54100.2	ALDH7B4	aldehyde dehydrogenase 7B4	LOC_Os09g26880.1	aldehyde dehydrogenase, putative, expressed
Sobic.002G217400	--	--	--	--	1.57324	--	--	--	--	--	--	AT3G14050.1	AT-RSH2,ATRSH2,RSH2	RELA/SPOT homolog 2	LOC_Os09g27050.1	HD domain containing protein, putative, expressed
Sobic.002G247600	--	--	--	--	--	--	--	-2.12192	--	--	Beta-glucosidase 30 (Precursor) GN=BGLU30 OS=Oryza sativa subsp. japonica (Rice) PE=2 SV=1	AT2G44480.1	BGLU17	beta glucosidase 17	LOC_Os09g31430.1	Os9bglu30 - beta-glucosidase, similar to Os4bglu12 exoglucanase, expressed
Sobic.002G265800	--	4.74301	7.98006	4.2033	5.33345	--	--	3.98604	2.90064	3.50658	Crocetin glucosyltransferase 2 GN=GLT2 OS=Crocus sativus (Saffron) PE=1 SV=1	AT2G43820.1	ATSAGT1,GT,SAGT1,SGT1,UGT74F2	UDP-glucosyltransferase 74F2	LOC_Os09g34250.1	UDP-glucoronosyl and UDP-glucosyl transferase domain containing protein, expressed
Sobic.002G281000	--	--	1.62882	--	--	--	--	1.92317	--	--	Probable aquaporin PIP2-7 OS=Oryza sativa subsp. japonica (Rice) PE=2 SV=2	AT4G35100.2	PIP2;7,PIP3,PIP3A,SIMIP	plasma membrane intrinsic protein 3	LOC_Os09g36930.1	aquaporin protein, putative, expressed
Sobic.002G337800	--	--	--	--	--	--	--	--	--	3.76483	Transcription factor MYB39 GN=dl4925c OS=Arabidopsis thaliana (Mouse-ear cress) PE=2 SV=1	AT4G21440.1	ATM4,ATMYB102,MYB102	MYB-like 102	LOC_Os07g37210.1	MYB family transcription factor, putative, expressed
Sobic.003G017500	--	--	--	--	--	--	--	--	-1.10707	--	Inactive TPR repeat-containing thioredoxin TTL3 GN=F14N22.15 OS=Arabidopsis thaliana (Mouse-ear cress) PE=1 SV=2	AT2G42580.1	TTL3,VIT	tetratricopetide-repeat thioredoxin-like 3	LOC_Os05g11990.1	TTL1, putative, expressed
Sobic.003G024400	--	--	-6.54448	-4.87744	--	--	--	-5.24911	-6.06878	--	CBL-interacting protein kinase 5 OS=Oryza sativa subsp. japonica (Rice) PE=2 SV=1	AT5G45820.1	CIPK20,PKS18,SnRK3.6	CBL-interacting protein kinase 20	LOC_Os01g10890.1	CAMK_KIN1/SNF1/Nim1_like.8 - CAMK includes calcium/calmodulin depedent protein kinases, expressed
Sobic.003G036600	--	--	1.67666	--	1.20662	--	--	1.50689	--	1.94397	Transcription factor MYB1R1 OS=Solanum tuberosum (Potato) PE=2 SV=1	AT5G47390.1	--	myb-like transcription factor family protein	LOC_Os01g09280.1	myb-related transcription activator, putative, expressed
Sobic.003G078400	--	--	-1.97717	--	--	--	--	--	-1.36998	--	Protein ASPARTIC PROTEASE IN GUARD CELL 1 (Precursor) GN=ASPG1 OS=Arabidopsis thaliana (Mouse-ear cress) PE=1 SV=1	AT1G25510.1	--	Eukaryotic aspartyl protease family protein	LOC_Os01g04710.1	aspartic proteinase, putative, expressed
Sobic.003G133700	--	--	--	-1.97955	--	--	--	--	-1.70288	1.62613	Probable anion transporter 1, chloroplastic (Precursor) OS=Oryza sativa subsp. japonica (Rice) PE=2 SV=1	AT2G29650.1	ANTR1,PHT4;1	phosphate transporter 4;1	LOC_Os01g17240.1	transporter, major facilitator family, putative, expressed
Sobic.003G136400	--	--	--	--	-1.75149	--	--	--	--	--	Peptidyl-prolyl cis-trans isomerase CYP20-3, chloroplastic (Precursor) GN=F21F14.200 OS=Arabidopsis thaliana (Mouse-ear cress) PE=1 SV=1	AT3G62030.3	ROC4	rotamase CYP 4	LOC_Os01g18210.1	peptidyl-prolyl cis-trans isomerase, putative, expressed
Sobic.003G139500	--	--	--	--	--	--	--	-1.48003	--	1.7557	CBL-interacting protein kinase 1 GN=P0706B05.31 OS=Oryza sativa subsp. japonica (Rice) PE=2 SV=1	AT3G17510.1	CIPK1,SnRK3.16	CBL-interacting protein kinase 1	LOC_Os01g18800.1	CAMK_KIN1/SNF1/Nim1_like.9 - CAMK includes calcium/calmodulin depedent protein kinases, expressed
Sobic.003G142400	--	--	3.28517	--	--	--	--	2.90165	--	--	Putative pentatricopeptide repeat-containing protein At1g56570 GN=PCMP-E64 OS=Arabidopsis thaliana (Mouse-ear cress) PE=3 SV=1	AT1G56570.1	--	Tetratricopeptide repeat (TPR)-like superfamily protein	LOC_Os01g19380.1	pentatricopeptide, putative, expressed
Sobic.003G183700	--	--	-2.92917	-2.73364	-3.13084	--	--	--	-1.97267	-4.71376	DNA replication licensing factor MCM3 homolog 1 GN=ROA1 OS=Zea mays (Maize) PE=2 SV=2	AT2G16440.1	MCM4	Minichromosome maintenance (MCM2/3/5) family protein	LOC_Os01g36390.1	MCM4 - Putative minichromosome maintenance MCM complex subunit 4, expressed
Sobic.003G198200	--	--	--	--	1.72477	--	--	--	--	1.80968	Probable protein phosphatase 2C 6 OS=Oryza sativa subsp. japonica (Rice) PE=2 SV=1	AT1G72770.1	HAB1	homology to ABI1	LOC_Os01g40094.1	protein phosphatase 2C, putative, expressed
Sobic.003G199400	--	--	--	-1.78626	-1.48042	--	--	--	--	--	Probable WRKY transcription factor 50 GN=WRKY50 OS=Arabidopsis thaliana (Mouse-ear cress) PE=2 SV=1	AT5G26170.1	ATWRKY50,WRKY50	WRKY DNA-binding protein 50	LOC_Os01g40260.1	WRKY77, expressed
Sobic.003G201000	--	--	--	--	--	--	--	--	-1.91558	-1.74952	Protein DAMAGED DNA-BINDING 2 GN=DDB2 OS=Arabidopsis thaliana (Mouse-ear cress) PE=1 SV=1	AT1G80710.1	DRS1	DROUGHT SENSITIVE 1	LOC_Os08g18150.1	WD domain, G-beta repeat domain containing protein, expressed
Sobic.003G225500	--	--	--	--	--	--	--	--	--	-2.6302	Protein TOO MANY MOUTHS (Precursor) GN=F18B13.16 OS=Arabidopsis thaliana (Mouse-ear cress) PE=2 SV=1	AT1G80080.1	AtRLP17,TMM	Leucine-rich repeat (LRR) family protein	LOC_Os01g43440.1	TOO MANY MOUTHS precursor, putative, expressed
Sobic.003G294500	--	--	-3.07606	-3.7427	-5.10415	--	--	--	-1.89829	-5.29312	Dynamin-related protein 5A GN=DRP5A OS=Arabidopsis thaliana (Mouse-ear cress) PE=2 SV=1	AT1G53140.1	DRP5A	Dynamin related protein 5A	LOC_Os01g54420.1	dynamin family protein, putative, expressed
Sobic.003G313800	--	--	--	--	--	--	-1.29667	--	--	--	Cytokinin dehydrogenase 5 (Precursor) OS=Oryza sativa subsp. japonica (Rice) PE=2 SV=1	AT1G75450.1	ATCKX5,ATCKX6,CKX5	cytokinin oxidase 5	LOC_Os01g56810.1	cytokinin dehydrogenase precursor, putative, expressed
Sobic.003G317400	--	--	--	--	-1.53832	--	--	--	--	--	Sphingosine kinase 2 GN=SPHK2 OS=Arabidopsis thaliana (Mouse-ear cress) PE=1 SV=1	AT4G21534.1	--	Diacylglycerol kinase family protein	LOC_Os01g57350.1	diacylglycerol kinase, putative, expressed
Sobic.003G327400	--	--	--	--	5.49724	--	--	3.13761	--	5.31635	EID1-like F-box protein 3 GN=EDL3 OS=Arabidopsis thaliana (Mouse-ear cress) PE=2 SV=1	AT3G63060.1	EDL3	EID1-like 3	LOC_Os01g58850.1	circadian clock coupling factor-related, putative, expressed
Sobic.003G355200	--	--	-1.90587	--	--	--	--	-1.46842	--	--	Probable mannose-1-phosphate guanylyltransferase 3 OS=Oryza sativa subsp. japonica (Rice) PE=2 SV=1	AT2G39770.1	CYT1,EMB101,GMP1,SOZ1,VTC1	Glucose-1-phosphate adenylyltransferase family protein	LOC_Os08g13930.1	mannose-1-phosphate guanyltransferase, putative, expressed
Sobic.003G356000	--	--	--	-1.67599	--	--	--	1.58484	1.35008	2.82046	Gamma-glutamyl phosphate reductase GN=OJ1651_D06.9 OS=Oryza sativa subsp. japonica (Rice) PE=2 SV=2	AT3G55610.2	P5CS2	delta 1-pyrroline-5-carboxylate synthase 2	LOC_Os01g62900.1	amino acid kinase, putative, expressed
Sobic.003G403700	--	--	--	-1.17041	--	--	--	--	--	1.86766	Ubiquitin (Precursor) OS=Avena fatua (Wild oats) PE=2 SV=2	AT4G05320.2	UBQ10	polyubiquitin 10	LOC_Os06g46770.1	ubiquitin family protein, putative, expressed
Sobic.003G433300	--	--	2.80435	1.43136	--	--	--	1.45005	--	--	DNA mismatch repair protein MLH1 GN=MLH1 OS=Arabidopsis thaliana (Mouse-ear cress) PE=2 SV=1	AT4G09140.1	ATMLH1,MLH1	MUTL-homologue 1	LOC_Os01g72880.1	DNA mismatch repair protein Mlh1, putative, expressed
Sobic.004G035300	--	--	--	--	--	--	--	--	--	-1.71674	ATP-dependent DNA helicase Q-like 4A GN=At1g10930 OS=Arabidopsis thaliana (Mouse-ear cress) PE=2 SV=1	AT1G10930.1	ATRECQ4A,ATSGS1,RECQ4A	DNA helicase (RECQl4A)	--
Sobic.004G062000	--	--	2.48209	1.36757	--	--	--	--	--	--	Putative glucose-6-phosphate 1-epimerase OS=Cenchrus ciliaris (Buffelgrass) PE=2 SV=1	AT5G57330.1	--	Galactose mutarotase-like superfamily protein	LOC_Os02g08030.1	aldose 1-epimerase, putative, expressed
Sobic.004G078600	--	--	--	--	--	--	--	1.42073	--	--	Lipoxygenase 2.3, chloroplastic (Precursor) GN=LOX2.3 OS=Hordeum vulgare (Barley) PE=1 SV=1	AT3G45140.1	ATLOX2,LOX2	lipoxygenase 2	LOC_Os02g10120.1	lipoxygenase, putative, expressed
Sobic.004G114800	--	--	--	--	--	--	--	--	-1.20129	--	Rhodanese-like domain-containing protein 4, chloroplastic (Precursor) GN=F2N1.31 OS=Arabidopsis thaliana (Mouse-ear cress) PE=1 SV=2	AT4G01050.1	TROL	thylakoid rhodanese-like	LOC_Os02g15750.1	expressed protein
Sobic.004G206200	--	--	--	-4.22322	--	--	--	--	--	--	--	AT4G14605.1	--	Mitochondrial transcription termination factor family protein	LOC_Os02g39040.1	mTERF domain containing protein, expressed
Sobic.004G232300	--	--	-1.8257	--	--	--	--	--	--	--	Annexin D7 OS=Arabidopsis thaliana (Mouse-ear cress) PE=2 SV=1	AT5G10230.1	ANN7,ANNAT7	annexin 7	LOC_Os02g51750.1	annexin, putative, expressed
Sobic.004G237300	--	--	--	--	--	--	--	--	-1.19508	-2.41254	Transcription factor TCP14 GN=TCP14 OS=Arabidopsis thaliana (Mouse-ear cress) PE=1 SV=1	AT3G47620.1	AtTCP14,TCP14	TEOSINTE BRANCHED, cycloidea and PCF (TCP) 14	LOC_Os02g51280.1	TCP-domain protein, putative, expressed
Sobic.004G246400	--	--	--	1.69914	--	--	--	--	1.49691	--	RNA-dependent RNA polymerase 1 GN=F10B6.19 OS=Arabidopsis thaliana (Mouse-ear cress) PE=2 SV=1	AT1G14790.1	ATRDRP1,RDR1	RNA-dependent RNA polymerase 1	LOC_Os02g50330.1	RNA-dependent RNA polymerase, putative, expressed
Sobic.004G265800	--	--	--	--	--	--	--	1.38331	--	--	Putative uracil phosphoribosyltransferase GN=UKL3 OS=Arabidopsis thaliana (Mouse-ear cress) PE=2 SV=1	AT1G26190.1	--	Phosphoribulokinase / Uridine kinase family	LOC_Os02g47860.1	uridine kinase, putative, expressed
Sobic.004G281700	--	--	--	--	2.24084	--	--	--	--	3.5177	Arginine/serine-rich protein 45 GN=F19K19.9 OS=Arabidopsis thaliana (Mouse-ear cress) PE=1 SV=1	AT1G05510.1	--	Protein of unknown function (DUF1264)	LOC_Os05g49440.2	DUF1264 domain containing protein, putative, expressed
Sobic.004G344100	--	--	--	--	--	--	--	-1.36152	--	-2.21432	GDSL esterase/lipase At5g33370 (Precursor) GN=At5g33370 OS=Arabidopsis thaliana (Mouse-ear cress) PE=2 SV=1	AT5G33370.1	--	GDSL-like Lipase/Acylhydrolase superfamily protein	LOC_Os02g57110.1	GDSL-like lipase/acylhydrolase, putative, expressed
Sobic.004G354700	--	-6.48205	-2.9033	-6.27116	--	--	--	-2.09305	-3.40663	-2.04669	Transcription factor TCP7 GN=TCP7 OS=Arabidopsis thaliana (Mouse-ear cress) PE=2 SV=1	AT5G23280.1	--	TCP family transcription factor	LOC_Os12g07480.1	TCP family transcription factor, putative, expressed
Sobic.005G003900	--	--	--	1.29313	--	--	--	--	1.17327	--	Probable phytol kinase 2, chloroplastic (Precursor) OS=Oryza sativa subsp. japonica (Rice) PE=2 SV=3	AT5G58560.1	--	Phosphatidate cytidylyltransferase family protein	LOC_Os11g01450.1	phosphatidate cytidylyltransferase, putative, expressed
Sobic.005G024200	--	--	-1.6136	--	--	--	--	--	--	--	CBL-interacting protein kinase 32 GN=CIPK32 OS=Oryza sativa subsp. japonica (Rice) PE=2 SV=2	AT2G26980.3	CIPK3,SnRK3.17	CBL-interacting protein kinase 3	LOC_Os12g03810.2	CAMK_KIN1/SNF1/Nim1_like.37 - CAMK includes calcium/calmodulin depedent protein kinases, expressed
Sobic.005G029700	--	--	--	--	--	--	--	--	--	-1.55281	Regulatory protein NPR5 GN=F13H10.8 OS=Arabidopsis thaliana (Mouse-ear cress) PE=1 SV=1	AT2G41370.1	BOP2	Ankyrin repeat family protein / BTB/POZ domain-containing protein	LOC_Os12g04410.1	BTBA6 - Bric-a-Brac,Tramtrack, Broad Complex BTB domain with Ankyrin repeat region, expressed
Sobic.005G056400	--	--	-3.04603	-2.12178	--	--	-1.21013	-1.97431	-1.44793	--	Fructose-bisphosphate aldolase, chloroplastic (Precursor) OS=Oryza sativa subsp. japonica (Rice) PE=1 SV=2	AT4G38970.1	FBA2	fructose-bisphosphate aldolase 2	LOC_Os11g07020.1	fructose-bisphospate aldolase isozyme, putative, expressed
Sobic.005G061000	--	--	--	--	1.84048	--	--	--	--	--	ABC transporter G family member 25 GN=F17M19.11 OS=Arabidopsis thaliana (Mouse-ear cress) PE=2 SV=1	AT1G71960.1	ABCG25,ATABCG25	ATP-binding casette family G25	LOC_Os11g07600.1	ABC-2 type transporter domain containing protein, expressed
Sobic.005G064800	--	--	2.03488	--	--	--	--	1.77503	--	--	Aldehyde dehydrogenase family 3 member I1, chloroplastic (Precursor) GN=ALDH3I1 OS=Arabidopsis thaliana (Mouse-ear cress) PE=2 SV=2	AT1G44170.2	ALDH3H1,ALDH4	aldehyde dehydrogenase 3H1	LOC_Os11g08300.1	aldehyde dehydrogenase, putative, expressed
Sobic.005G136200	--	--	2.21016	--	--	--	--	--	--	--	Chalcone synthase 5 GN=CHS5 OS=Sorghum bicolor (Sorghum) PE=3 SV=1	AT5G13930.1	ATCHS,CHS,TT4	Chalcone and stilbene synthase family protein	LOC_Os11g32650.1	chalcone synthase, putative, expressed
Sobic.005G136300	--	3.62883	4.80401	2.72549	--	--	--	3.10457	1.96784	--	Chalcone synthase 4 GN=CHS4 OS=Sorghum bicolor (Sorghum) PE=3 SV=1	AT5G13930.1	ATCHS,CHS,TT4	Chalcone and stilbene synthase family protein	LOC_Os11g32650.1	chalcone synthase, putative, expressed
Sobic.005G137000	--	--	3.55909	--	--	--	--	3.46745	--	--	Chalcone synthase 1 GN=CHS1 OS=Sorghum bicolor (Sorghum) PE=3 SV=1	AT5G13930.1	ATCHS,CHS,TT4	Chalcone and stilbene synthase family protein	LOC_Os11g32650.1	chalcone synthase, putative, expressed
Sobic.006G112500	--	--	--	--	-1.23192	--	--	--	--	--	Poly(A)-specific ribonuclease PARN GN=F14J16.11 OS=Arabidopsis thaliana (Mouse-ear cress) PE=1 SV=2	AT1G55870.1	AHG2,ATPARN	Polynucleotidyl transferase, ribonuclease H-like superfamily protein	LOC_Os04g39260.3	CAF1 family ribonuclease containing protein, putative, expressed
Sobic.006G148000	--	--	1.93468	--	--	--	--	--	--	--	Myb-related protein Myb4 GN=OSJNBa0073E02.6 OS=Oryza sativa subsp. japonica (Rice) PE=2 SV=2	AT3G23250.1	ATMYB15,ATY19,MYB15	myb domain protein 15	LOC_Os04g43680.1	MYB family transcription factor, putative, expressed
Sobic.006G150100	--	--	-6.08122	-3.69496	--	--	--	-4.1466	-3.28605	--	Aquaporin PIP2-5 GN=PIP2-5 OS=Zea mays (Maize) PE=1 SV=1	AT2G37170.1	PIP2;2,PIP2B	plasma membrane intrinsic protein 2	LOC_Os02g41860.2	aquaporin protein, putative, expressed
Sobic.006G158266	--	-1.20474	--	--	--	--	--	--	--	--	L-type lectin-domain containing receptor kinase IV.1 (Precursor) GN=F13M22.21 OS=Arabidopsis thaliana (Mouse-ear cress) PE=1 SV=1	AT2G37710.1	RLK	receptor lectin kinase	LOC_Os04g44910.1	receptor like protein kinase, putative, expressed
Sobic.006G186500	--	--	--	-2.72276	--	--	--	--	-1.45249	--	Guard cell S-type anion channel SLAC1 OS=Arabidopsis thaliana (Mouse-ear cress) PE=1 SV=1	AT1G12480.1	CDI3,OZS1,RCD3,SLAC1	C4-dicarboxylate transporter/malic acid transport protein	LOC_Os04g48530.1	C4-dicarboxylate transporter/malic acid transport protein domain containing protein, expressed
Sobic.006G228000	--	--	2.81578	--	--	--	--	--	--	--	Glycine-rich protein 2 GN=GRP-2 OS=Nicotiana sylvestris (Wood tobacco) PE=1 SV=1	AT4G36020.1	CSDP1	cold shock domain protein 1	LOC_Os01g36570.1	glycine-rich protein 2, putative
Sobic.006G248300	--	--	--	--	--	--	--	--	1.40086	--	Probable linoleate 9S-lipoxygenase 5 GN=LOX1.5 OS=Solanum tuberosum (Potato) PE=2 SV=1	AT3G22400.1	LOX5	PLAT/LH2 domain-containing lipoxygenase family protein	LOC_Os03g49380.1	lipoxygenase, putative, expressed
Sobic.006G279400	--	--	--	--	--	--	--	-1.65026	--	--	NAC domain-containing protein 7 GN=T28K15.1 OS=Arabidopsis thaliana (Mouse-ear cress) PE=2 SV=2	AT1G71930.1	ANAC030,VND7	vascular related NAC-domain protein 7	LOC_Os08g01330.1	no apical meristem protein, putative, expressed
Sobic.007G003000	--	--	--	--	--	--	--	--	-1.81249	-2.83567	NAC domain-containing protein 7 GN=T28K15.1 OS=Arabidopsis thaliana (Mouse-ear cress) PE=2 SV=2	AT4G36160.1	ANAC076,NAC076,VND2	NAC domain containing protein 76	LOC_Os08g01330.1	no apical meristem protein, putative, expressed
Sobic.007G020700	--	--	--	--	--	--	--	--	--	-2.01871	DNA-directed RNA polymerase II subunit RPB1 GN=F4B14.70 OS=Arabidopsis thaliana (Mouse-ear cress) PE=1 SV=3	AT1G12420.1	ACR8	ACT domain repeat 8	LOC_Os03g14370.2	ACT domain containing protein, expressed
Sobic.007G116950	--	--	--	-1.63418	-1.14755	--	--	--	-1.43682	--	Peptidyl-prolyl cis-trans isomerase, chloroplastic (Precursor) GN=TLP40 OS=Spinacia oleracea (Spinach) PE=1 SV=1	AT3G01480.1	ATCYP38,CYP38	cyclophilin 38	LOC_Os08g29370.1	peptidyl-prolyl cis-trans isomerase, chloroplast precursor, putative, expressed
Sobic.007G136500	--	--	--	--	--	--	--	--	--	-2.37255	Transcription factor MYB39 GN=dl4925c OS=Arabidopsis thaliana (Mouse-ear cress) PE=2 SV=1	AT3G01140.1	AtMYB106,MYB106,NOK	myb domain protein 106	LOC_Os08g33660.1	MYB family transcription factor, putative, expressed
Sobic.007G144600	--	--	--	--	1.32892	--	--	--	--	--	Receptor-like protein kinase (Precursor) GN=INRPK1 OS=Ipomoea nil (Japanese morning glory) PE=2 SV=2	AT1G73080.1	ATPEPR1,PEPR1	PEP1 receptor 1	LOC_Os08g34640.1	receptor-like protein kinase precursor, putative, expressed
Sobic.007G150100	--	--	--	-1.56728	--	--	--	--	-1.28632	--	Arginine/serine-rich protein 45 GN=F19K19.9 OS=Arabidopsis thaliana (Mouse-ear cress) PE=1 SV=1	AT1G54130.1	AT-RSH3,ATRSH3,RSH3	RELA/SPOT homolog 3	LOC_Os08g35620.1	HD domain containing protein, putative, expressed
Sobic.007G164400	--	-1.72159	--	--	--	--	--	--	--	--	Inorganic phosphate transporter 1-6 OS=Oryza sativa subsp. japonica (Rice) PE=1 SV=1	AT3G54700.1	PHT1;7	phosphate transporter 1;7	LOC_Os08g45000.1	inorganic phosphate transporter, putative, expressed
Sobic.007G171000	--	--	--	--	--	--	--	--	--	1.71975	Monodehydroascorbate reductase GN=AFRR OS=Solanum lycopersicum (Tomato) PE=1 SV=1	AT3G52880.1	ATMDAR1,MDAR1	monodehydroascorbate reductase 1	LOC_Os08g44340.1	monodehydroascorbate reductase, putative, expressed
Sobic.007G201900	--	--	--	--	--	--	--	--	--	-2.25359	Leucine-rich repeat extensin-like protein 3 (Precursor) GN=LRX3 OS=Arabidopsis thaliana (Mouse-ear cress) PE=1 SV=1	AT3G20260.1	--	Protein of unknown function (DUF1666)	LOC_Os08g40820.1	expressed protein
Sobic.008G016200	--	--	-1.51167	--	--	--	--	--	--	--	CBL-interacting protein kinase 32 GN=CIPK32 OS=Oryza sativa subsp. japonica (Rice) PE=2 SV=2	AT2G26980.3	CIPK3,SnRK3.17	CBL-interacting protein kinase 3	LOC_Os12g03810.2	CAMK_KIN1/SNF1/Nim1_like.37 - CAMK includes calcium/calmodulin depedent protein kinases, expressed
Sobic.008G020700	--	--	--	--	--	--	--	--	--	-1.77939	ZF-HD homeobox protein At4g24660 GN=At4g24660 OS=Arabidopsis thaliana (Mouse-ear cress) PE=1 SV=1	AT3G28917.1	MIF2	mini zinc finger 2	LOC_Os11g03420.1	ZF-HD protein dimerisation region containing protein, expressed
Sobic.008G053200	--	--	-2.12191	-2.13634	--	--	--	--	-1.6033	--	Fructose-bisphosphate aldolase, chloroplastic (Precursor) OS=Oryza sativa subsp. japonica (Rice) PE=1 SV=2	AT4G38970.1	FBA2	fructose-bisphosphate aldolase 2	LOC_Os11g07020.1	fructose-bisphospate aldolase isozyme, putative, expressed
Sobic.008G064700	--	--	-3.147	-1.76248	--	--	--	-2.38463	-1.9971	--	GDP-L-galactose phosphorylase 2 GN=MCO15.7 OS=Arabidopsis thaliana (Mouse-ear cress) PE=1 SV=1	AT5G55120.1	VTC5	galactose-1-phosphate guanylyltransferase (GDP)s;GDP-D-glucose phosphorylases;quercetin 4\'-O-glucosyltransferases	LOC_Os12g08810.1	VTC2, putative, expressed
Sobic.008G094400	--	--	--	-2.06011	--	--	--	--	-1.33668	--	Bidirectional sugar transporter SWEET13 GN=OsJ_36063 OS=Oryza sativa subsp. japonica (Rice) PE=2 SV=1	AT5G23660.1	MTN3	homolog of Medicago truncatula MTN3	LOC_Os12g29220.1	nodulin MtN3 family protein, putative, expressed
Sobic.008G112200	--	--	--	--	--	--	--	--	--	-2.01301	Transcription factor MYB46 GN=MYB46 OS=Arabidopsis thaliana (Mouse-ear cress) PE=2 SV=1	AT5G12870.1	ATMYB46,MYB46	myb domain protein 46	LOC_Os12g33070.1	myb-like DNA-binding domain containing protein, putative, expressed
Sobic.008G133700	--	--	--	-2.22309	--	--	--	--	-1.28541	--	Myb-related protein MYBAS2 OS=Oryza sativa subsp. japonica (Rice) PE=2 SV=1	AT5G59780.1	ATMYB59,ATMYB59-1,ATMYB59-2,ATMYB59-3,MYB59	myb domain protein 59	LOC_Os12g37970.1	MYB family transcription factor, putative, expressed
Sobic.008G156900	--	--	--	--	--	--	--	--	--	-1.60479	Auxin-responsive protein IAA30 GN=IAA30 OS=Oryza sativa subsp. japonica (Rice) PE=2 SV=1	AT3G04730.1	IAA16	indoleacetic acid-induced protein 16	LOC_Os12g40890.1	OsIAA30 - Auxin-responsive Aux/IAA gene family member, expressed
Sobic.008G183400	--	-1.46649	-2.29196	-1.80686	--	--	--	--	-1.65838	--	Phospholipase D alpha 1 GN=PLD1 OS=Zea mays (Maize) PE=2 SV=1	AT3G15730.1	PLD,PLDALPHA1	phospholipase D alpha 1	LOC_Os01g07760.1	phospholipase D, putative, expressed
Sobic.008G185900	--	--	--	--	--	--	1.05052	--	1.55189	--	Glycine-rich RNA-binding protein 1 (Fragment) GN=GRP1 OS=Sorghum bicolor (Sorghum) PE=2 SV=1	AT2G21660.1	ATGRP7,CCR2,GR-RBP7,GRP7	cold, circadian rhythm, and rna binding 2	LOC_Os12g43600.1	RNA recognition motif containing protein, expressed
Sobic.008G191200	--	--	--	--	--	--	--	2.01393	--	2.02154	Leucine-rich repeat extensin-like protein 5 (Precursor) GN=LRX5 OS=Arabidopsis thaliana (Mouse-ear cress) PE=2 SV=2	AT5G40010.1	AATP1	AAA-ATPase 1	LOC_Os12g24320.1	ATPase 3, putative, expressed
Sobic.009G010900	--	--	--	--	-1.55086	--	--	--	--	--	Uncharacterized protein At2g37660, chloroplastic (Precursor) GN=At2g37660 OS=Arabidopsis thaliana (Mouse-ear cress) PE=1 SV=2	AT2G37660.1	--	NAD(P)-binding Rossmann-fold superfamily protein	LOC_Os05g01970.1	NAD dependent epimerase/dehydratase family protein, putative, expressed
Sobic.009G017732	--	--	-3.60344	--	--	--	--	--	--	2.67753	Glutathione S-transferase DHAR2 GN=F22H5.1 OS=Arabidopsis thaliana (Mouse-ear cress) PE=1 SV=1	AT1G75270.1	DHAR2	dehydroascorbate reductase 2	LOC_Os05g02530.1	glutathione S-transferase, N-terminal domain containing protein, expressed
Sobic.009G017800	--	1.01582	--	--	--	--	--	--	-1.20533	--	Glutathione S-transferase DHAR2 GN=F22H5.1 OS=Arabidopsis thaliana (Mouse-ear cress) PE=1 SV=1	AT1G75270.1	DHAR2	dehydroascorbate reductase 2	LOC_Os05g02530.1	glutathione S-transferase, N-terminal domain containing protein, expressed
Sobic.009G027800	--	--	-1.99803	-2.47969	--	--	--	-1.41422	-2.17167	--	Phosphoinositide phospholipase C 2 GN=PLC2 OS=Arabidopsis thaliana (Mouse-ear cress) PE=1 SV=1	AT3G08510.1	ATPLC2,PLC2	phospholipase C 2	LOC_Os05g03610.1	phospholipase C, putative, expressed
Sobic.009G036000	--	--	--	--	1.95528	--	--	--	2.89254	--	Hydrophobic protein LTI6B GN=OSJNBa0069I13.6 OS=Oryza sativa subsp. japonica (Rice) PE=2 SV=1	AT3G05880.1	RCI2A	Low temperature and salt responsive protein family	LOC_Os05g04700.1	OsRCI2-6 - Hydrophobic protein LTI6B, expressed
Sobic.009G046200	--	--	--	--	2.21798	--	--	--	--	4.45028	Translocator protein homolog GN=TSPO OS=Arabidopsis thaliana (Mouse-ear cress) PE=1 SV=1	AT2G47770.1	ATTSPO,TSPO	TSPO(outer membrane tryptophan-rich sensory protein)-related	LOC_Os05g05930.1	peripheral-type benzodiazepine receptor, putative, expressed
Sobic.009G080200	--	--	1.88979	--	--	--	--	1.39173	--	--	Abscisic acid receptor PYL8 GN=MFH8.10 OS=Arabidopsis thaliana (Mouse-ear cress) PE=1 SV=1	AT5G53160.2	PYL8,RCAR3	regulatory components of ABA receptor 3	LOC_Os05g12260.1	CAPIP1, putative, expressed
Sobic.009G083300	--	--	--	-1.55525	--	--	--	--	--	--	ABC transporter G family member 12 GN=F5D21.6 OS=Arabidopsis thaliana (Mouse-ear cress) PE=1 SV=1	AT3G21090.1	--	ABC-2 type transporter family protein	LOC_Os05g13520.1	white-brown complex homolog protein 12, putative, expressed
Sobic.009G124600	--	--	--	1.46635	--	--	--	--	--	--	Probable folate-biopterin transporter 7 GN=At1g64890 OS=Arabidopsis thaliana (Mouse-ear cress) PE=2 SV=1	AT1G64890.1	--	Major facilitator superfamily protein	LOC_Os05g32320.1	integral membrane transporter family protein, putative, expressed
Sobic.009G133800	--	--	-1.59904	-1.44903	--	--	--	--	--	--	Probable uridine nucleosidase 2 GN=URH2 OS=Arabidopsis thaliana (Mouse-ear cress) PE=2 SV=1	AT5G18860.1	--	inosine-uridine preferring nucleoside hydrolase family protein	LOC_Os05g33630.1	inosine-uridine preferring nucleoside hydrolase family protein, putative, expressed
Sobic.009G147500	--	--	-2.3637	-2.49946	--	--	--	--	-1.93977	--	Potassium channel AKT2 OS=Oryza sativa subsp. japonica (Rice) PE=2 SV=1	AT4G22200.1	AKT2,AKT2/3,AKT3,KT2/3	potassium transport 2/3	LOC_Os05g35410.1	potassium channel AKT2/3, putative, expressed
Sobic.009G160100	--	--	--	--	1.17493	--	--	--	1.29786	1.67914	Gamma-glutamyl phosphate reductase GN=OJ1651_D06.9 OS=Oryza sativa subsp. japonica (Rice) PE=2 SV=2	AT3G55610.1	P5CS2	delta 1-pyrroline-5-carboxylate synthase 2	LOC_Os05g38150.1	amino acid kinase, putative, expressed
Sobic.009G213000	--	--	--	1.55231	2.46528	--	1.66012	--	2.32749	3.39411	Probable protein phosphatase 2C 50 OS=Oryza sativa subsp. japonica (Rice) PE=2 SV=1	AT1G72770.1	HAB1	homology to ABI1	LOC_Os05g46040.1	protein phosphatase 2C, putative, expressed
Sobic.009G223200	--	--	1.89773	--	--	--	--	2.17333	--	--	Chloroplastic group IIA intron splicing facilitator CRS1, chloroplastic (Precursor) GN=CRS1 OS=Zea mays (Maize) PE=1 SV=1	AT3G18390.1	EMB1865	CRS1 / YhbY (CRM) domain-containing protein	LOC_Os05g47850.1	chloroplastic group IIA intron splicing facilitator CRS1, chloroplast precursor, putative, expressed
Sobic.009G232266	--	--	--	-2.0395	--	--	--	-1.87566	--	--	Monothiol glutaredoxin-S9 GN=GRXS9 OS=Oryza sativa subsp. japonica (Rice) PE=2 SV=1	AT1G28480.1	GRX480,roxy19	Thioredoxin superfamily protein	LOC_Os01g47760.1	OsGrx_I1 - glutaredoxin subgroup III, expressed
Sobic.009G234500	--	--	-1.53841	-1.40848	--	--	--	-1.59816	-1.17128	--	Cold-regulated 413 inner membrane protein 1, chloroplastic (Precursor) GN=At1g29395 OS=Arabidopsis thaliana (Mouse-ear cress) PE=1 SV=1	AT1G29390.2	COR314-TM2,COR413IM2	cold regulated 314 thylakoid membrane 2	LOC_Os05g49170.1	cold acclimation protein WCOR413, putative, expressed
Sobic.009G236300	--	--	--	--	3.44008	--	--	--	--	--	L-type lectin-domain containing receptor kinase IV.1 (Precursor) GN=F13M22.21 OS=Arabidopsis thaliana (Mouse-ear cress) PE=1 SV=1	AT3G53810.1	--	Concanavalin A-like lectin protein kinase family protein	LOC_Os07g03900.1	lectin-like receptor kinase, putative, expressed
Sobic.009G242600	--	--	-1.65326	--	--	--	--	--	--	--	Probable isoprenylcysteine alpha-carbonyl methylesterase ICME GN=OJ1126_B10.7 OS=Oryza sativa subsp. japonica (Rice) PE=2 SV=1	AT5G15860.1	ATPCME,PCME	prenylcysteine methylesterase	LOC_Os05g50170.1	ATPCME, putative, expressed
Sobic.009G250000	--	--	--	-1.412	--	--	--	--	--	--	Transcription factor FAMA GN=MUJ8.4 OS=Arabidopsis thaliana (Mouse-ear cress) PE=1 SV=1	AT3G24140.1	FMA	basic helix-loop-helix (bHLH) DNA-binding superfamily protein	LOC_Os05g50900.1	helix-loop-helix DNA-binding protein, putative, expressed
Sobic.010G004300	--	--	-1.48021	--	--	--	--	-1.73158	--	--	Transcription factor ASG4 GN=F22L4.18 OS=Arabidopsis thaliana (Mouse-ear cress) PE=2 SV=1	AT5G52660.2	--	Homeodomain-like superfamily protein	LOC_Os06g01670.1	myb-like DNA-binding domain containing protein, expressed
Sobic.010G021800	--	-1.17936	-2.93619	-1.68157	--	--	--	-1.53828	-1.93288	--	Arginine decarboxylase 1 GN=P0493C11.18 OS=Oryza sativa subsp. japonica (Rice) PE=1 SV=1	AT4G34710.2	ADC2,ATADC2,SPE2	arginine decarboxylase 2	LOC_Os06g04070.1	pyridoxal-dependent decarboxylase protein, putative, expressed
Sobic.010G026925	--	--	--	--	-1.25849	--	--	--	--	--	Enolase 1 GN=ENO1 OS=Zea mays (Maize) PE=1 SV=1	AT2G36530.1	ENO2,LOS2	Enolase	LOC_Os06g04510.1	enolase, putative, expressed
Sobic.010G102800	--	-1.10195	--	--	--	--	--	--	--	--	Potassium channel KOR1 OS=Oryza sativa subsp. japonica (Rice) PE=2 SV=1	AT3G02850.1	SKOR	STELAR K+ outward rectifier	LOC_Os06g14030.1	potassium channel SKOR, putative, expressed
Sobic.010G111200	--	--	--	1.39287	-1.80606	--	--	--	--	-3.71198	Gibberellin-regulated protein 13 (Precursor) GN=GASA13 OS=Arabidopsis thaliana (Mouse-ear cress) PE=3 SV=1	AT5G15230.1	GASA4	GAST1 protein homolog 4	LOC_Os06g15620.1	GASR7 - Gibberellin-regulated GASA/GAST/Snakin family protein precursor, expressed
Sobic.010G169100	--	--	--	3.33257	--	--	--	2.55742	--	--	Abscisic acid receptor PYL2 GN=T19L18.15 OS=Arabidopsis thaliana (Mouse-ear cress) PE=1 SV=1	AT2G26040.1	PYL2,RCAR14	PYR1-like 2	LOC_Os06g36670.1	bet v I allergen family protein, putative, expressed
Sobic.010G170000	--	--	--	--	1.92909	--	--	--	--	2.1029	Diacylglycerol O-acyltransferase 1 GN=F3P11.5 OS=Arabidopsis thaliana (Mouse-ear cress) PE=1 SV=2	AT2G19450.1	ABX45,AS11,ATDGAT,DGAT1,RDS1,TAG1	membrane bound O-acyl transferase (MBOAT) family protein	LOC_Os06g36800.1	O-acyltransferase, putative, expressed
Sobic.010G239500	--	--	--	-2.64371	--	--	--	--	--	--	Ubiquitin (Precursor) GN=UBQ11 OS=Arabidopsis thaliana (Mouse-ear cress) PE=1 SV=1	AT4G05320.4	UBQ10	polyubiquitin 10	LOC_Os06g46770.1	ubiquitin family protein, putative, expressed
Sobic.010G241200	--	--	-1.84728	-3.07718	--	--	--	--	-2.61407	--	IAA-amino acid hydrolase ILR1-like 6 (Precursor) GN=P0532H03.15 OS=Oryza sativa subsp. japonica (Rice) PE=2 SV=1	AT1G44350.1	ILL6	IAA-leucine resistant (ILR)-like gene 6	LOC_Os06g47620.1	peptidase, putative, expressed
Sobic.001G033100	--	--	--	--	--	--	--	--	-1.22488	--	Uncharacterized protein At2g37660, chloroplastic (Precursor) GN=At2g37660 OS=Arabidopsis thaliana (Mouse-ear cress) PE=1 SV=2	AT2G37660.1	--	NAD(P)-binding Rossmann-fold superfamily protein	LOC_Os03g60740.1	expressed protein
Sobic.001G059900	--	--	--	--	--	--	--	--	--	-3.18708	Type I inositol 1,4,5-trisphosphate 5-phosphatase CVP2 GN=CVP2 OS=Arabidopsis thaliana (Mouse-ear cress) PE=1 SV=2	AT3G63240.1	--	DNAse I-like superfamily protein	LOC_Os03g57950.1	type I inositol-1,4,5-trisphosphate 5-phosphatase, putative, expressed
Sobic.001G259700	--	--	2.18395	--	--	--	--	3.54026	--	--	Protein TIFY 3A GN=T18D12.10 OS=Arabidopsis thaliana (Mouse-ear cress) PE=1 SV=1	AT3G43440.1	JAZ11,TIFY3A	jasmonate-zim-domain protein 11	LOC_Os10g25230.1	ZIM domain containing protein, putative, expressed
Sobic.001G259600	--	--	3.05543	--	--	--	--	3.17327	--	--	Lysine-rich arabinogalactan protein 19 (Precursor) GN=AGP19 OS=Arabidopsis thaliana (Mouse-ear cress) PE=2 SV=2	AT3G43440.1	JAZ11,TIFY3A	jasmonate-zim-domain protein 11	LOC_Os03g08330.1	ZIM domain containing protein, putative, expressed
Sobic.004G007500	--	--	2.21428	1.61437	--	--	--	1.89317	1.23746	--	Allene oxide synthase 1, chloroplastic (Precursor) OS=Oryza sativa subsp. japonica (Rice) PE=2 SV=1	AT5G42650.1	AOS,CYP74A,DDE2	allene oxide synthase	LOC_Os03g12500.1	cytochrome P450, putative, expressed
Sobic.010G084400	--	--	2.70276	--	--	--	--	--	--	--	12-oxophytodienoate reductase 1 OS=Oryza sativa subsp. japonica (Rice) PE=2 SV=1	AT1G76680.1	ATOPR1,OPR1	12-oxophytodienoate reductase 1	LOC_Os06g11290.1	12-oxophytodienoate reductase, putative, expressed
Sobic.006G091600	--	--	1.817	--	--	--	--	--	--	--	Putative 12-oxophytodienoate reductase 11 GN=OPR11 OS=Oryza sativa subsp. japonica (Rice) PE=2 SV=1	AT1G76690.1	ATOPR2,OPR2	12-oxophytodienoate reductase 2	LOC_Os06g11240.1	12-oxophytodienoate reductase, putative, expressed
