# Supplementary material for: Comparative Transcriptome Analysis of Two Sweet Sorghum Genotypes with Different Salt Tolerance Abilities to Reveal the Mechanism of Salt Tolerance
Source: Int J Mol Sci. 2022 Feb 18;23(4):2272. doi: 10.3390/ijms23042272 (PMC8877675; doi:10.3390/ijms23042272)
Supplement: Supplementary file 1 [file ijms-23-02272-s001.zip › TableS5-DE TFs.xlsx]

## Sheet: Sheet1
Table S5 Differentially expression transcription factors.
Gene	TF Family	Expression Patten	Module	Log2 (FC) in RIO-1h	Log2 (FC) in RIO-2h	Log2 (FC) in RIO-6h	Log2 (FC) in RIO-12h	Log2 (FC) in RIO-24h	Log2 (FC) in SN005-1h	Log2 (FC) in SN005-2h	Log2 (FC) in SN005-6h	Log2 (FC) in SN005-12h	Log2 (FC) in SN005-24h	Swissprot_annotation	Homologous in Arabidopsis thaliana			Homologous in Oryza sativa
Sobic.002G206400	AP2	Common response	ME1	--	--	-1.82784	-1.82789	--	--	--	-1.80918	--	--	AP2-like ethylene-responsive transcription factor At1g16060 GN=At1g16060 OS=Arabidopsis thaliana (Mouse-ear cress) PE=2 SV=1	AT1G16060.1	ADAP	ARIA-interacting double AP2 domain protein	LOC_Os06g05340.1	AP2 domain containing protein, expressed
Sobic.010G202700	AP2	Common response	ME1	--	--	--	--	--	--	--	--	--	-2.55388	Floral homeotic protein APETALA 2 GN=AP2 OS=Arabidopsis thaliana (Mouse-ear cress) PE=1 SV=1	AT4G36920.1	AP2,FL1,FLO2	Integrase-type DNA-binding superfamily protein	LOC_Os06g43220.1	AP2 domain containing protein, expressed
Sobic.003G251700	ARF	Common response	ME1	--	--	--	--	--	--	--	--	-1.2523	-1.78308	Auxin response factor 2 GN=ARF2 OS=Oryza sativa subsp. japonica (Rice) PE=2 SV=1	AT2G33860.1	ARF3,ETT	Transcriptional factor B3 family protein / auxin-responsive factor AUX/IAA-related	LOC_Os01g48060.2	auxin response factor, putative, expressed
Sobic.006G262100	ARF	Common response	ME1	--	--	--	--	--	--	--	--	-1.07775	--	Auxin response factor 12 GN=OSJNBb0004A17.6 OS=Oryza sativa subsp. japonica (Rice) PE=2 SV=1	AT1G30330.1	ARF6	auxin response factor 6	LOC_Os04g57610.1	auxin response factor, putative, expressed
Sobic.010G073600	ARF	Common response	ME1	--	--	-2.22851	--	--	--	--	--	--	--	Auxin response factor 16 GN=OsJ_019622 OS=Oryza sativa subsp. japonica (Rice) PE=2 SV=1	AT1G19220.1	ARF11,ARF19,IAA22	auxin response factor 19	LOC_Os06g09660.1	auxin response factor, putative, expressed
Sobic.002G353200	BES1	Common response	ME1	--	--	--	--	--	--	--	--	--	-2.49752	BES1/BZR1 homolog protein 2 GN=BEH2 OS=Arabidopsis thaliana (Mouse-ear cress) PE=1 SV=1	AT1G19350.3	BES1,BZR2	Brassinosteroid signalling positive regulator (BZR1) family protein	LOC_Os07g39220.1	BES1/BZR1 homolog protein, putative, expressed
Sobic.010G163900	BES1	Common response	ME1	--	--	--	--	--	--	--	--	--	-1.7155	BES1/BZR1 homolog protein 4 GN=BEH4 OS=Arabidopsis thaliana (Mouse-ear cress) PE=1 SV=1	AT1G78700.1	BEH4	BES1/BZR1 homolog 4	LOC_Os06g35900.1	BES1/BZR1 homolog protein, putative, expressed
Sobic.001G488400	bHLH	Common response	ME1	--	--	--	--	-2.88424	1.11654	--	--	--	-4.72966	Transcription factor bHLH135 GN=At1g74500 OS=Arabidopsis thaliana (Mouse-ear cress) PE=1 SV=1	AT3G28857.1	--	basic helix-loop-helix (bHLH) DNA-binding family protein	LOC_Os10g26410.1	bHLH family protein, putative, expressed
Sobic.001G527500	bHLH	Common response	ME1	--	--	--	--	--	--	--	--	--	-2.04254	Transcription factor bHLH57 GN=F11O4.13 OS=Arabidopsis thaliana (Mouse-ear cress) PE=2 SV=1	AT2G46810.1	--	basic helix-loop-helix (bHLH) DNA-binding superfamily protein	LOC_Os03g03000.1	helix-loop-helix DNA-binding domain containing protein, expressed
Sobic.002G235700	bHLH	Common response	ME1	--	--	-1.85935	--	--	--	--	--	--	--	Transcription factor bHLH49 GN=T6L1.10 OS=Arabidopsis thaliana (Mouse-ear cress) PE=2 SV=1	AT1G68920.3	--	basic helix-loop-helix (bHLH) DNA-binding superfamily protein	LOC_Os09g29830.2	helix-loop-helix DNA-binding domain containing protein, expressed
Sobic.004G237000	bHLH	Common response	ME1	--	--	--	--	-1.70376	--	--	-1.43578	--	-2.61835	Transcription factor bHLH135 GN=At1g74500 OS=Arabidopsis thaliana (Mouse-ear cress) PE=1 SV=1	AT1G26945.1	KDR	basic helix-loop-helix (bHLH) DNA-binding superfamily protein	LOC_Os02g51320.1	helix-loop-helix DNA-binding domain containing protein, expressed
Sobic.004G275500	bHLH	Common response	ME1	--	--	-1.52104	--	-1.50873	--	--	--	--	--	Transcription factor bHLH96 GN=T9N14.4 OS=Arabidopsis thaliana (Mouse-ear cress) PE=2 SV=1	AT3G24140.1	FMA	basic helix-loop-helix (bHLH) DNA-binding superfamily protein	LOC_Os02g46560.1	helix-loop-helix DNA-binding protein, putative, expressed
Sobic.007G189400	bHLH	Common response	ME1	--	--	--	--	--	--	--	-1.74294	--	-1.74216	Transcription factor bHLH137 GN=K3K7 OS=Arabidopsis thaliana (Mouse-ear cress) PE=2 SV=1	AT5G50915.2	--	basic helix-loop-helix (bHLH) DNA-binding superfamily protein	LOC_Os08g42470.1	BEE 1, putative, expressed
Sobic.009G036400	bHLH	Common response	ME1	1.14338	--	--	--	--	--	--	--	--	--	Transcription factor PIF3 GN=F14J9.19 OS=Arabidopsis thaliana (Mouse-ear cress) PE=1 SV=1	AT1G09530.1	PAP3,PIF3,POC1	phytochrome interacting factor 3	LOC_Os05g04740.1	helix-loop-helix DNA-binding domain containing protein, expressed
Sobic.003G049400	bZIP	Common response	ME1	1.34042	1.11756	--	--	--	--	--	--	--	--	Transcription factor HY5 GN=HY5 OS=Solanum lycopersicum (Tomato) PE=2 SV=1	AT5G11260.1	HY5,TED 5	Basic-leucine zipper (bZIP) transcription factor family protein	LOC_Os01g07880.1	transcription factor HY5, putative, expressed
Sobic.004G085600	bZIP	Common response	ME1	1.57734	1.313	-1.57822	-1.56863	-1.25265	1.48962	1.03694	-2.73681	-2.18183	--	Transcription factor HY5 GN=F2I11_150 OS=Arabidopsis thaliana (Mouse-ear cress) PE=1 SV=1	AT5G11260.1	HY5,TED 5	Basic-leucine zipper (bZIP) transcription factor family protein	LOC_Os02g10860.1	bZIP transcription factor domain containing protein, expressed
Sobic.006G133700	bZIP	Common response	ME1	--	--	--	--	--	--	--	--	--	-2.00843	Transcription factor RF2a OS=Oryza sativa subsp. japonica (Rice) PE=1 SV=1	AT2G31370.4	--	Basic-leucine zipper (bZIP) transcription factor family protein	LOC_Os04g41820.1	transcription factor RF2a, putative, expressed
Sobic.010G183600	bZIP	Common response	ME1	2.70981	2.63651	--	--	--	2.72988	2.84176	--	--	--	Transcription factor HY5 GN=F2I11_150 OS=Arabidopsis thaliana (Mouse-ear cress) PE=1 SV=1	AT5G11260.1	HY5,TED 5	Basic-leucine zipper (bZIP) transcription factor family protein	LOC_Os02g10860.1	bZIP transcription factor domain containing protein, expressed
Sobic.001G242900	C2H2	Common response	ME1	--	--	-1.86369	--	--	--	--	--	--	-1.57259	Zinc finger protein JACKDAW GN=F15A17.180 OS=Arabidopsis thaliana (Mouse-ear cress) PE=1 SV=1	AT5G03150.1	JKD	C2H2-like zinc finger protein	LOC_Os10g28330.1	ZOS10-04 - C2H2 zinc finger protein, expressed
Sobic.001G427600	C2H2	Common response	ME1	--	--	--	--	--	--	--	-1.64516	-1.37552	-3.16412	Arginine/serine-rich protein 45 GN=F19K19.9 OS=Arabidopsis thaliana (Mouse-ear cress) PE=1 SV=1	AT2G29660.1	--	zinc finger (C2H2 type) family protein	LOC_Os03g15790.1	ZOS3-08 - C2H2 zinc finger protein, expressed
Sobic.002G245500	C2H2	Common response	ME1	--	--	-2.18662	--	--	--	--	-1.97252	-1.44394	-1.54198	Protein TRANSPARENT TESTA 1 GN=TT1 OS=Arabidopsis thaliana (Mouse-ear cress) PE=2 SV=1	AT3G57670.1	NTT,WIP2	C2H2-type zinc finger family protein	LOC_Os08g39390.1	ZOS8-10 - C2H2 zinc finger protein, expressed
Sobic.006G009500	C2H2	Common response	ME1	--	--	--	--	--	--	--	--	--	-1.72565	Vegetative cell wall protein gp1 (Precursor) GN=GP1 OS=Chlamydomonas reinhardtii (Chlamydomonas smithii) PE=2 SV=1	AT1G75710.1	--	C2H2-like zinc finger protein	LOC_Os04g02510.1	ZOS4-01 - C2H2 zinc finger protein, expressed
Sobic.008G160600	CPP	Common response	ME1	--	--	--	--	--	--	--	--	--	-2.29802	CRC domain-containing protein TSO1 GN=TSO1 OS=Arabidopsis thaliana (Mouse-ear cress) PE=1 SV=1	AT3G22780.1	ATTSO1,TSO1	Tesmin/TSO1-like CXC domain-containing protein	LOC_Os12g41230.1	tesmin/TSO1-like CXC domain containing protein, expressed
Sobic.009G075600	DBB	Common response	ME1	--	--	--	-1.66902	--	--	--	--	-1.74804	--	Probable salt tolerance-like protein At1g78600 GN=At1g78600 OS=Arabidopsis thaliana (Mouse-ear cress) PE=1 SV=2	AT1G78600.1	DBB3,LZF1,STH3	light-regulated zinc finger protein 1	LOC_Os05g11510.1	B-box zinc finger family protein, putative, expressed
Sobic.004G266200	Dof	Common response	ME1	--	--	--	--	--	--	--	--	--	-1.93682	Dof zinc finger protein DOF5.6 GN=DOF5.6 OS=Arabidopsis thaliana (Mouse-ear cress) PE=2 SV=2	AT5G62940.1	DOF5.6,HCA2	Dof-type zinc finger DNA-binding family protein	LOC_Os02g47810.1	dof zinc finger domain containing protein, putative, expressed
Sobic.001G386700	G2-like	Common response	ME1	--	--	--	--	1.82077	--	--	1.27179	--	1.89828	Myb family transcription factor APL GN=APL OS=Arabidopsis thaliana (Mouse-ear cress) PE=2 SV=2	AT3G04030.3	--	Homeodomain-like superfamily protein	LOC_Os03g20900.1	Myb transcription factor, putative, expressed
Sobic.002G422000	G2-like	Common response	ME1	--	--	-1.89465	-1.51771	--	--	--	--	-1.20943	-1.50689	Myb family transcription factor APL GN=APL OS=Arabidopsis thaliana (Mouse-ear cress) PE=2 SV=2	AT5G18240.1	ATMYR1,MYR1	myb-related protein 1	LOC_Os03g20900.1	Myb transcription factor, putative, expressed
Sobic.003G046800	G2-like	Common response	ME1	--	--	-1.55865	--	--	--	--	--	--	-1.556	Probable transcription factor RL9 GN=B1040D06.24 OS=Oryza sativa subsp. japonica (Rice) PE=2 SV=2	AT2G03500.1	--	Homeodomain-like superfamily protein	LOC_Os01g08160.1	MYB family transcription factor, putative, expressed
Sobic.006G256200	G2-like	Common response	ME1	--	--	--	--	1.96102	--	--	--	--	--	Protein PHR1-LIKE 1 GN=PHL1 OS=Arabidopsis thaliana (Mouse-ear cress) PE=1 SV=1	AT5G06800.1	--	myb-like HTH transcriptional regulator family protein	LOC_Os04g56990.1	Myb-like DNA-binding domain containing protein, putative, expressed
Sobic.009G180500	G2-like	Common response	ME1	--	--	--	1.41639	--	--	--	--	--	--	Protein PHR1-LIKE 1 GN=PHL1 OS=Arabidopsis thaliana (Mouse-ear cress) PE=1 SV=1	AT2G01060.1	--	myb-like HTH transcriptional regulator family protein	LOC_Os05g41240.1	Myb-like DNA-binding domain containing protein, putative, expressed
Sobic.001G299600	GATA	Common response	ME1	--	--	-1.61734	-1.46259	-1.35153	--	--	-1.38514	-1.66488	-4.21196	GATA transcription factor 2 GN=GATA2 OS=Arabidopsis thaliana (Mouse-ear cress) PE=2 SV=1	AT3G60530.1	GATA4	GATA transcription factor 4	LOC_Os10g40810.1	GATA zinc finger domain containing protein, expressed
Sobic.002G357800	GRAS	Common response	ME1	--	--	--	--	--	--	--	--	--	-2.0649	Protein SHORT-ROOT 1 OS=Oryza sativa subsp. japonica (Rice) PE=1 SV=2	AT4G37650.1	SGR7,SHR	GRAS family transcription factor	LOC_Os07g39820.1	SHR, putative, expressed
Sobic.001G120900	GRAS	Common response	ME1	--	--	--	-1.23201	--	--	--	--	-1.4153	-1.70304	DELLA protein DWARF8 GN=D8 OS=Zea mays (Maize) PE=1 SV=1	AT1G14920.1	GAI,RGA2	GRAS family transcription factor family protein	LOC_Os03g49990.1	GRAS family transcription factor domain containing protein, expressed
Sobic.001G253900	HD-ZIP	Common response	ME1	--	--	-1.79479	--	--	--	--	-1.61345	-1.44838	-2.51077	Homeobox-leucine zipper protein HOX23 GN=OSJNBb0044I14.6 OS=Oryza sativa subsp. japonica (Rice) PE=2 SV=1	AT1G69780.1	ATHB13	Homeobox-leucine zipper protein family	LOC_Os10g26500.1	homeobox associated leucine zipper, putative, expressed
Sobic.001G488900	HD-ZIP	Common response	ME1	--	--	--	--	--	--	--	--	--	-3.05746	Homeobox-leucine zipper protein HOX21 GN=HOX21 OS=Oryza sativa subsp. indica (Rice) PE=2 SV=2	AT1G69780.1	ATHB13	Homeobox-leucine zipper protein family	LOC_Os03g07450.1	homeobox associated leucine zipper, putative, expressed
Sobic.007G032100	HD-ZIP	Common response	ME1	--	--	-1.65693	--	--	--	--	--	-1.37751	-1.9911	Homeobox-leucine zipper protein ROC7 OS=Oryza sativa subsp. japonica (Rice) PE=2 SV=1	AT4G04890.1	PDF2	protodermal factor 2	LOC_Os08g04190.1	homeobox and START domains containing protein, putative, expressed
Sobic.007G152300	HD-ZIP	Common response	ME1	--	--	-2.04415	--	--	--	--	--	--	--	Homeobox-leucine zipper protein HOX27 GN=OSJNOa174H12.5 OS=Oryza sativa subsp. japonica (Rice) PE=2 SV=1	AT5G06710.1	HAT14	homeobox from Arabidopsis thaliana	LOC_Os08g36220.1	homeobox associated leucine zipper, putative, expressed
Sobic.010G030100	HD-ZIP	Common response	ME1	--	--	-2.44704	-1.22326	--	--	--	-2.31935	-1.70359	-2.91466	Homeobox-leucine zipper protein HOX28 OS=Oryza sativa subsp. japonica (Rice) PE=2 SV=1	AT5G06710.1	HAT14	homeobox from Arabidopsis thaliana	LOC_Os06g04850.1	homeobox associated leucine zipper, putative, expressed
Sobic.002G224200	HSF	Common response	ME1	--	--	--	--	-2.65845	--	--	--	--	-4.50104	Heat stress transcription factor B-4c OS=Oryza sativa subsp. japonica (Rice) PE=2 SV=1	AT1G46264.1	AT-HSFB4,HSFB4,SCZ	heat shock transcription factor B4	LOC_Os09g28200.1	HSF-type DNA-binding domain containing protein, expressed
Sobic.001G437300	LBD	Common response	ME1	--	--	--	-2.82585	--	--	--	--	--	--	LOB domain-containing protein 18 GN=F4L23.7 OS=Arabidopsis thaliana (Mouse-ear cress) PE=2 SV=2	AT2G45420.1	LBD18	LOB domain-containing protein 18	LOC_Os03g14270.1	DUF260 domain containing protein, putative, expressed
Sobic.003G383700	LBD	Common response	ME1	--	--	--	--	--	--	--	-1.50095	--	--	LOB domain-containing protein 6 GN=LBD6 OS=Zea mays (Maize) PE=1 SV=1	AT1G65620.2	AS2	Lateral organ boundaries (LOB) domain family protein	LOC_Os01g66590.1	DUF260 domain containing protein, putative, expressed
Sobic.007G028700	LSD	Common response	ME1	--	--	--	-1.84095	--	--	--	--	-1.91539	-1.94275	Protein LOL4 OS=Oryza sativa subsp. japonica (Rice) PE=2 SV=1	AT4G20380.2	LSD1	LSD1 zinc finger family protein	LOC_Os08g03610.1	LSD1 zinc finger domain containing protein, expressed
Sobic.007G050100	LSD	Common response	ME1	--	--	--	-1.48982	-1.40642	--	--	-1.46357	-1.15625	--	Protein LSD1 GN=OsJ_26122 OS=Oryza sativa subsp. japonica (Rice) PE=2 SV=1	AT1G32540.1	LOL1	lsd one like 1	LOC_Os08g06280.3	LSD1 zinc finger domain containing protein, expressed
Sobic.003G145100	MYB	Common response	ME1	1.38622	1.3283	--	--	--	1.10969	--	--	--	--	Myb-related protein P GN=P OS=Zea mays (Maize) PE=2 SV=1	AT2G47460.1	ATMYB12,MYB12,PFG1	myb domain protein 12	LOC_Os01g19970.1	MYB family transcription factor, putative, expressed
Sobic.005G104800	MYB	Common response	ME1	--	--	-1.58541	-1.67265	--	--	--	--	--	--	Transcription factor MYB44 GN=K8K14.2 OS=Arabidopsis thaliana (Mouse-ear cress) PE=2 SV=1	AT1G17950.1	ATMYB52,BW52,MYB52	myb domain protein 52	LOC_Os11g10130.1	MYB family transcription factor, putative, expressed
Sobic.005G224700	MYB	Common response	ME1	--	--	-2.25835	-3.49931	--	--	--	-1.39155	-2.45792	--	Myb-related protein MYBAS1 GN=MYBAS1 OS=Oryza sativa subsp. japonica (Rice) PE=2 SV=1	AT5G59780.3	ATMYB59,ATMYB59-1,ATMYB59-2,ATMYB59-3,MYB59	myb domain protein 59	LOC_Os11g47460.1	MYB family transcription factor, putative, expressed
Sobic.008G020300	MYB	Common response	ME1	1.15635	--	--	--	--	--	--	--	--	--	Myb-related protein 306 GN=MYB306 OS=Antirrhinum majus (Garden snapdragon) PE=2 SV=1	AT1G08810.1	AtMYB60,MYB60	myb domain protein 60	LOC_Os11g03440.1	myb-like DNA-binding domain containing protein, putative, expressed
Sobic.008G112200	MYB	Common response	ME1	--	--	--	--	--	--	--	--	--	-2.01301	Transcription factor MYB46 GN=MYB46 OS=Arabidopsis thaliana (Mouse-ear cress) PE=2 SV=1	AT5G12870.1	ATMYB46,MYB46	myb domain protein 46	LOC_Os12g33070.1	myb-like DNA-binding domain containing protein, putative, expressed
Sobic.004G267000	MYB_related	Common response	ME1	--	--	--	-4.16764	-2.63556	--	--	-2.31937	-4.36202	-2.18534	Protein RADIALIS-like 3 GN=RL3 OS=Arabidopsis thaliana (Mouse-ear cress) PE=2 SV=1	AT1G75250.1	ATRL6,RL6,RSM3	RAD-like 6	LOC_Os02g47744.1	MYB family transcription factor, putative, expressed
Sobic.005G062000	MYB_related	Common response	ME1	--	--	--	--	--	--	--	-1.33022	--	-1.59748	Transcription repressor MYB4 GN=MYB4 OS=Arabidopsis thaliana (Mouse-ear cress) PE=1 SV=1	AT4G38620.1	ATMYB4,MYB4	myb domain protein 4	LOC_Os01g65370.1	MYB family transcription factor, putative, expressed
Sobic.009G244600	MYB_related	Common response	ME1	--	--	--	-4.17991	-4.1455	1.21241	--	--	-3.71917	-4.52947	Protein RADIALIS-like 3 GN=RL3 OS=Arabidopsis thaliana (Mouse-ear cress) PE=2 SV=1	AT1G75250.1	ATRL6,RL6,RSM3	RAD-like 6	LOC_Os05g50350.1	MYB family transcription factor, putative, expressed
Sobic.003G251800	NAC	Common response	ME1	--	--	--	-1.32479	--	--	--	--	--	-1.66637	NAC domain-containing protein 8 GN=NAC008 OS=Arabidopsis thaliana (Mouse-ear cress) PE=2 SV=1	AT4G28500.1	ANAC073,NAC073,SND2	NAC domain containing protein 73	LOC_Os01g48130.2	no apical meristem protein, putative, expressed
Sobic.004G302400	NAC	Common response	ME1	1.12496	--	-2.13568	-2.94518	--	--	--	-1.4244	-2.19883	--	NAC domain-containing protein 7 GN=T28K15.1 OS=Arabidopsis thaliana (Mouse-ear cress) PE=2 SV=2	AT1G12260.1	ANAC007,EMB2749,NAC007,VND4	NAC 007	LOC_Os02g42970.1	NAC domain containing protein, putative, expressed
Sobic.007G003000	NAC	Common response	ME1	--	--	--	--	--	--	--	--	-1.81249	-2.83567	NAC domain-containing protein 7 GN=T28K15.1 OS=Arabidopsis thaliana (Mouse-ear cress) PE=2 SV=2	AT4G36160.1	ANAC076,NAC076,VND2	NAC domain containing protein 76	LOC_Os08g01330.1	no apical meristem protein, putative, expressed
Sobic.001G338700	NF-YB	Common response	ME1	--	--	--	-1.29054	-1.42272	--	--	--	-1.5366	--	Nuclear transcription factor Y subunit B-3 OS=Arabidopsis thaliana (Mouse-ear cress) PE=2 SV=1	AT4G14540.1	NF-YB3	nuclear factor Y, subunit B3	LOC_Os03g29970.1	histone-like transcription factor and archaeal histone, putative, expressed
Sobic.003G078100	RAV	Common response	ME1	--	--	--	-1.38232	-2.048	--	--	-1.37518	--	--	AP2/ERF and B3 domain-containing protein Os01g0141000 OS=Oryza sativa subsp. japonica (Rice) PE=2 SV=1	AT1G68840.1	EDF2,RAP2.8,RAV2,TEM2	related to ABI3/VP1 2	LOC_Os01g04800.1	B3 DNA binding domain containing protein, expressed
Sobic.003G406600	SBP	Common response	ME1	--	--	--	--	--	--	--	--	--	-1.61728	Squamosa promoter-binding-like protein 2 OS=Oryza sativa subsp. japonica (Rice) PE=2 SV=2	AT5G50670.1	--	Squamosa promoter-binding protein-like (SBP domain) transcription factor family protein	LOC_Os01g69830.1	OsSPL2 - SBP-box gene family member, expressed
Sobic.010G169200	TALE	Common response	ME1	--	--	-2.42369	--	--	--	--	-3.01224	-1.85157	--	Homeobox protein ATH1 GN=ATH1 OS=Arabidopsis thaliana (Mouse-ear cress) PE=1 SV=1	AT4G32980.1	ATH1	homeobox gene 1	LOC_Os02g13310.1	homeobox domain containing protein, expressed
Sobic.004G003700	Trihelix	Common response	ME1	--	--	--	--	--	--	--	--	--	-2.9351	Trihelix transcription factor GTL1 GN=GTL1 OS=Arabidopsis thaliana (Mouse-ear cress) PE=1 SV=2	AT1G76890.2	AT-GT2,GT2	Duplicated homeodomain-like superfamily protein	LOC_Os02g01380.1	expressed protein
Sobic.003G000600	WRKY	Common response	ME1	--	-1.51142	1.48904	--	--	--	--	1.62274	--	1.55132	WRKY transcription factor 6 GN=WRKY6 OS=Arabidopsis thaliana (Mouse-ear cress) PE=1 SV=1	AT1G62300.1	ATWRKY6,WRKY6	WRKY family transcription factor	LOC_Os01g14440.1	WRKY1, expressed
Sobic.003G444000	WRKY	Common response	ME1	--	--	--	--	--	2.53693	--	--	--	--	Probable WRKY transcription factor 49 GN=WRKY49 OS=Arabidopsis thaliana (Mouse-ear cress) PE=2 SV=1	AT5G43290.1	ATWRKY49,WRKY49	WRKY DNA-binding protein 49	LOC_Os01g74140.1	WRKY17, expressed
Sobic.009G212800	WRKY	Common response	ME1	-1.40179	--	--	--	--	--	--	--	--	--	Probable WRKY transcription factor 50 GN=WRKY50 OS=Arabidopsis thaliana (Mouse-ear cress) PE=2 SV=1	AT5G64810.1	ATWRKY51,WRKY51	WRKY DNA-binding protein 51	LOC_Os05g46020.1	WRKY7, expressed
Sobic.002G142000	B3	Common response	ME2	--	--	1.77853	--	--	--	--	--	--	--	B3 domain-containing protein Os01g0234100 OS=Oryza sativa subsp. japonica (Rice) PE=2 SV=1	AT3G19184.1	--	AP2/B3-like transcriptional factor family protein	LOC_Os01g13300.1	B3 DNA binding domain containing protein, expressed
Sobic.006G010400	C3H	Common response	ME2	--	--	--	--	--	--	--	1.32828	--	--	tRNA-dihydrouridine(47) synthase [NAD(P)(+)]-like OS=Oryza sativa subsp. japonica (Rice) PE=2 SV=2	AT4G38890.1	--	FMN-linked oxidoreductases superfamily protein	LOC_Os04g02730.1	tRNA-dihydrouridine synthase 3-like, putative, expressed
Sobic.003G026700	DBB	Common response	ME2	--	1.63369	3.08433	--	--	1.35173	1.517	2.67511	--	--	Probable salt tolerance-like protein At1g78600 GN=At1g78600 OS=Arabidopsis thaliana (Mouse-ear cress) PE=1 SV=2	AT1G78600.2	DBB3,LZF1,STH3	light-regulated zinc finger protein 1	LOC_Os01g10580.1	B-box zinc finger family protein, putative, expressed
Sobic.008G073400	DBB	Common response	ME2	--	--	1.88014	--	--	--	--	1.67195	--	--	Probable salt tolerance-like protein At1g78600 GN=At1g78600 OS=Arabidopsis thaliana (Mouse-ear cress) PE=1 SV=2	AT1G78600.2	DBB3,LZF1,STH3	light-regulated zinc finger protein 1	LOC_Os12g10660.1	B-box zinc finger family protein, putative, expressed
Sobic.007G077100	ERF	Common response	ME2	1.22504	--	1.74706	--	--	--	--	1.35936	--	--	Ethylene-responsive transcription factor 4 GN=ERF4 OS=Nicotiana tabacum (Common tobacco) PE=1 SV=1	AT3G20310.1	ATERF-7,ATERF7,ERF7	ethylene response factor 7	LOC_Os04g52090.1	AP2 domain containing protein, expressed
Sobic.001G229200	GATA	Common response	ME2	--	--	2.10937	1.51746	--	--	--	--	--	--	GATA transcription factor 5 GN=GATA5 OS=Arabidopsis thaliana (Mouse-ear cress) PE=2 SV=1	AT5G66320.2	GATA5	GATA transcription factor 5	LOC_Os10g32070.1	GATA zinc finger domain containing protein, expressed
Sobic.008G179800	GATA	Common response	ME2	--	--	1.92996	--	--	--	--	--	--	--	GATA transcription factor 4 GN=GATA4 OS=Arabidopsis thaliana (Mouse-ear cress) PE=2 SV=1	AT1G08010.2	GATA11	GATA transcription factor 11	LOC_Os12g42970.1	GATA zinc finger domain containing protein, expressed
Sobic.005G209000	GRAS	Common response	ME2	--	--	1.70721	--	--	--	--	--	--	--	Scarecrow-like protein 14 GN=SCL14 OS=Arabidopsis thaliana (Mouse-ear cress) PE=2 SV=2	AT1G07530.1	ATGRAS2,GRAS2,SCL14	SCARECROW-like 14	LOC_Os11g47910.1	SCARECROW, putative, expressed
Sobic.005G229400	GRAS	Common response	ME2	--	--	--	--	--	--	--	1.43627	--	--	Scarecrow-like protein 14 GN=SCL14 OS=Arabidopsis thaliana (Mouse-ear cress) PE=2 SV=2	AT1G07530.1	ATGRAS2,GRAS2,SCL14	SCARECROW-like 14	LOC_Os11g47870.1	GRAS family transcription factor domain containing protein, expressed
Sobic.006G148000	MYB	Common response	ME2	--	--	1.93468	--	--	--	--	--	--	--	Myb-related protein Myb4 GN=OSJNBa0073E02.6 OS=Oryza sativa subsp. japonica (Rice) PE=2 SV=2	AT3G23250.1	ATMYB15,ATY19,MYB15	myb domain protein 15	LOC_Os04g43680.1	MYB family transcription factor, putative, expressed
Sobic.002G248600	MYB_related	Common response	ME2	--	--	--	--	--	--	--	1.388	--	--	Formin-like protein 5 GN=P0453E05.107 OS=Oryza sativa subsp. japonica (Rice) PE=2 SV=2	AT2G44430.1	--	DNA-binding bromodomain-containing protein	LOC_Os09g31454.1	MYB family transcription factor, putative, expressed
Sobic.002G080100	NAC	Common response	ME2	1.56488	1.38886	3.24211	--	--	1.7184	--	2.35987	1.15756	--	NAC domain-containing protein 67 OS=Oryza sativa subsp. japonica (Rice) PE=2 SV=1	AT5G63790.1	ANAC102,NAC102	NAC domain containing protein 102	LOC_Os07g12340.1	NAC domain-containing protein 67, putative, expressed
Sobic.007G059500	NF-YB	Common response	ME2	--	--	2.03852	--	--	--	--	--	--	--	Nuclear transcription factor Y subunit B-3 OS=Oryza sativa subsp. japonica (Rice) PE=1 SV=2	AT4G14540.1	NF-YB3	nuclear factor Y, subunit B3	LOC_Os08g07740.1	histone-like transcription factor and archaeal histone, putative, expressed
Sobic.003G429800	SRS	Common response	ME2	--	--	1.59759	--	--	--	--	2.61174	--	--	Vegetative cell wall protein gp1 (Precursor) GN=GP1 OS=Chlamydomonas reinhardtii (Chlamydomonas smithii) PE=2 SV=1	AT5G12330.1	LRP1	Lateral root primordium (LRP) protein-related	LOC_Os01g72490.1	LRP1, putative, expressed
Sobic.004G070200	Trihelix	Common response	ME2	--	--	2.67664	1.92454	--	--	--	2.12804	1.24688	--	Trihelix transcription factor GT-3b GN=F16M14.18 OS=Arabidopsis thaliana (Mouse-ear cress) PE=1 SV=1	AT5G63420.1	emb2746	RNA-metabolising metallo-beta-lactamase family protein	LOC_Os02g33610.1	metallo-beta-lactamase, putative, expressed
Sobic.004G065900	WRKY	Common response	ME2	--	--	1.5702	--	--	--	--	1.73494	--	--	Probable WRKY transcription factor 40 GN=WRKY40 OS=Arabidopsis thaliana (Mouse-ear cress) PE=1 SV=1	AT1G80840.1	ATWRKY40,WRKY40	WRKY DNA-binding protein 40	LOC_Os02g08440.1	WRKY71, expressed
Sobic.004G309600	bZIP	Common response	ME3	--	--	--	--	2.20829	--	1.10816	--	--	2.4146	bZIP transcription factor TRAB1 OS=Oryza sativa subsp. japonica (Rice) PE=1 SV=1	AT1G45249.1	ABF2,AREB1,ATAREB1	abscisic acid responsive elements-binding factor 2	LOC_Os02g52780.1	bZIP transcription factor, putative, expressed
Sobic.008G129300	bZIP	Common response	ME3	1.38701	--	--	--	1.69312	--	--	--	--	--	Ocs element-binding factor 1 GN=OBF1 OS=Zea mays (Maize) PE=2 SV=2	AT3G62420.1	ATBZIP53,BZIP53	basic region/leucine zipper motif 53	LOC_Os12g37410.1	CPuORF5 - conserved peptide uORF-containing transcript, expressed
Sobic.001G252800	Dof	Common response	ME3	--	--	--	--	1.13598	--	--	--	--	--	Cyclic dof factor 2 GN=MIJ24.16 OS=Arabidopsis thaliana (Mouse-ear cress) PE=1 SV=2	AT5G62430.1	CDF1	cycling DOF factor 1	LOC_Os03g07360.1	expressed protein
Sobic.005G051200	ERF	Common response	ME3	--	--	--	--	2.37857	--	--	--	1.99184	4.24749	Ethylene-responsive transcription factor ABR1 GN=MVP7.8 OS=Arabidopsis thaliana (Mouse-ear cress) PE=2 SV=1	AT5G61890.1	--	Integrase-type DNA-binding superfamily protein	LOC_Os04g32620.1	ethylene-responsive transcription factor ERF114, putative, expressed
Sobic.007G124100	ERF	Common response	ME3	--	--	--	--	1.86526	--	--	--	--	--	Ethylene-responsive transcription factor ERF060 GN=ERF060 OS=Arabidopsis thaliana (Mouse-ear cress) PE=2 SV=1	AT4G39780.1	--	Integrase-type DNA-binding superfamily protein	LOC_Os08g31580.1	ethylene-responsive transcription factor, putative, expressed
Sobic.004G300300	HD-ZIP	Common response	ME3	1.54806	--	--	2.70738	5.07971	1.42092	2.77693	2.03432	4.21878	5.75776	Homeobox-leucine zipper protein HOX24 GN=HOX24 OS=Oryza sativa subsp. indica (Rice) PE=2 SV=2	AT2G46680.1	ATHB-7,ATHB7,HB-7	homeobox 7	LOC_Os02g43330.1	homeobox associated leucine zipper, putative, expressed
Sobic.001G057700	HSF	Common response	ME3	--	--	--	--	1.22214	--	--	--	--	1.65355	Heat stress transcription factor A-2e OS=Oryza sativa subsp. japonica (Rice) PE=2 SV=1	AT3G22830.1	AT-HSFA6B,HSFA6B	heat shock transcription factor A6B	LOC_Os03g58160.1	heat stress transcription factor, putative, expressed
Sobic.001G450700	HSF	Common response	ME3	--	--	--	--	1.1512	--	--	1.34996	--	--	Heat stress transcription factor A-9 OS=Oryza sativa subsp. japonica (Rice) PE=2 SV=1	AT4G17750.1	ATHSF1,ATHSFA1A,HSF1,HSFA1A	heat shock factor 1	LOC_Os03g12370.1	HSF-type DNA-binding domain containing protein, expressed
Sobic.004G101400	HSF	Common response	ME3	1.13639	--	-3.47918	--	2.90081	--	--	-1.94858	--	3.08266	Heat stress transcription factor C-2a GN=OJ1705_E12.15 OS=Oryza sativa subsp. japonica (Rice) PE=2 SV=1	AT3G24520.1	AT-HSFC1,HSFC1	heat shock transcription factor C1	LOC_Os02g13800.1	HSF-type DNA-binding domain containing protein, expressed
Sobic.004G003401	MIKC	Common response	ME3	--	--	--	--	1.68652	--	--	--	--	1.70914	MADS-box transcription factor 50 OS=Oryza sativa subsp. japonica (Rice) PE=2 SV=1	AT2G45660.1	AGL20,ATSOC1,SOC1	AGAMOUS-like 20	LOC_Os02g01355.1	MADS-box transcription factor, putative, expressed
Sobic.007G013800	MIKC	Common response	ME3	--	--	--	--	1.69903	--	--	1.99353	--	2.99967	MADS-box transcription factor 26 GN=P0498H04.24 OS=Oryza sativa subsp. japonica (Rice) PE=2 SV=1	AT1G71692.1	AGL12,XAL1	AGAMOUS-like 12	LOC_Os08g02070.1	OsMADS26 - MADS-box family gene with MIKCc type-box, expressed
Sobic.003G034300	MYB_related	Common response	ME3	--	--	--	--	1.56872	--	--	--	1.22149	2.27897	Transcription factor MYB1R1 OS=Solanum tuberosum (Potato) PE=2 SV=1	AT5G56840.1	--	myb-like transcription factor family protein	LOC_Os01g09640.1	Myb transcription factor, putative, expressed
Sobic.009G072200	MYB_related	Common response	ME3	--	--	--	--	1.75998	--	--	--	--	1.99981	Transcription factor MYB1R1 OS=Solanum tuberosum (Potato) PE=2 SV=1	AT5G56840.1	--	myb-like transcription factor family protein	LOC_Os05g10690.1	Myb transcription factor, putative, expressed
Sobic.008G021800	NAC	Common response	ME3	--	--	--	2.45072	3.39012	--	--	--	2.59095	3.95602	NAC transcription factor 25 GN=At1g61110 OS=Arabidopsis thaliana (Mouse-ear cress) PE=2 SV=1	AT1G61110.1	anac025,NAC025	NAC domain containing protein 25	LOC_Os12g03040.1	no apical meristem protein, putative, expressed
Sobic.005G177800	bHLH	Common response	ME4	--	--	--	-1.5273	1.6912	--	--	--	--	--	Transcription factor bHLH47 GN=F1P2.190 OS=Arabidopsis thaliana (Mouse-ear cress) PE=2 SV=1	AT3G47640.2	PYE	basic helix-loop-helix (bHLH) DNA-binding superfamily protein	LOC_Os11g38870.1	helix-loop-helix DNA-binding domain containing protein, expressed
Sobic.006G175200	bHLH	Common response	ME4	2.20828	1.87454	--	--	2.47496	--	--	--	--	--	Anthocyanin regulatory R-S protein GN=R-S OS=Zea mays (Maize) PE=2 SV=1	AT1G63650.3	ATMYC-2,EGL1,EGL3	basic helix-loop-helix (bHLH) DNA-binding superfamily protein	LOC_Os04g47080.1	anthocyanin regulatory Lc protein, putative, expressed
Sobic.001G243000	HSF	Common response	ME4	1.21802	--	-1.81403	-1.70911	1.33548	--	--	-2.10682	-1.54361	1.6907	Heat stress transcription factor A-2c OS=Oryza sativa subsp. japonica (Rice) PE=2 SV=2	AT3G22830.1	AT-HSFA6B,HSFA6B	heat shock transcription factor A6B	LOC_Os10g28340.1	heat stress transcription factor, putative, expressed
Sobic.001G496200	HSF	Common response	ME4	--	-1.41747	-4.57539	-4.25112	--	--	--	-2.49273	-4.88744	--	Heat stress transcription factor A-2d OS=Oryza sativa subsp. japonica (Rice) PE=2 SV=2	AT3G22830.1	AT-HSFA6B,HSFA6B	heat shock transcription factor A6B	LOC_Os03g06630.2	heat stress transcription factor, putative, expressed
Sobic.006G182800	HSF	Common response	ME4	--	-1.02214	-3.29944	-2.22726	--	--	--	-2.82349	-2.15181	1.79923	Heat stress transcription factor B-2a GN=OSJNBb0032E06.3 OS=Oryza sativa subsp. japonica (Rice) PE=2 SV=2	AT5G62020.1	AT-HSFB2A,HSFB2A	heat shock transcription factor B2A	LOC_Os04g48030.1	heat stress transcription factor B-1, putative, expressed
Sobic.001G297500	MYB_related	Common response	ME4	--	--	-2.4723	-1.68027	--	--	--	-1.58287	-1.17393	--	Transcription factor MYB1R1 OS=Solanum tuberosum (Potato) PE=2 SV=1	AT5G47390.1	--	myb-like transcription factor family protein	LOC_Os10g41200.1	MYB family transcription factor, putative, expressed
Sobic.007G047400	MYB_related	Common response	ME4	-1.50783	-2.60955	-8.10225	-8.46283	--	-1.42654	-2.35654	-7.00447	-8.02223	--	Protein LHY GN=LHY OS=Arabidopsis thaliana (Mouse-ear cress) PE=1 SV=2	AT1G01060.1	LHY,LHY1	Homeodomain-like superfamily protein	LOC_Os08g06110.2	MYB family transcription factor, putative, expressed
Sobic.010G004300	MYB_related	Common response	ME4	--	--	-1.48021	--	--	--	--	-1.73158	--	--	Transcription factor ASG4 GN=F22L4.18 OS=Arabidopsis thaliana (Mouse-ear cress) PE=2 SV=1	AT5G52660.2	--	Homeodomain-like superfamily protein	LOC_Os06g01670.1	myb-like DNA-binding domain containing protein, expressed
Sobic.010G104100	NF-X1	Common response	ME4	1.03557	--	--	--	--	--	--	--	--	--	NF-X1-type zinc finger protein NFXL1 GN=NFXL1 OS=Arabidopsis thaliana (Mouse-ear cress) PE=2 SV=1	AT1G10170.1	ATNFXL1,NFXL1	NF-X-like 1	LOC_Os06g14190.1	NF-X1-type zinc finger protein, putative, expressed
Sobic.001G068301	bHLH	Common response	ME5	-3.05075	-3.04475	-2.44928	-3.27332	--	-1.15591	-1.27314	-1.83237	-2.7533	--	Transcription factor PIF5 GN=F17J16.110 OS=Arabidopsis thaliana (Mouse-ear cress) PE=1 SV=1	AT2G20180.2	PIF1,PIL5	phytochrome interacting factor 3-like 5	LOC_Os03g56950.1	phytochrome-interacting factor 4, putative, expressed
Sobic.002G031000	bHLH	Common response	ME5	-1.40642	-1.0104	-1.62898	-1.55867	--	--	-1.2068	-1.3938	-1.99237	--	Transcription factor PIF5 GN=F17J16.110 OS=Arabidopsis thaliana (Mouse-ear cress) PE=1 SV=1	AT2G20180.2	PIF1,PIL5	phytochrome interacting factor 3-like 5	LOC_Os07g05010.1	helix-loop-helix DNA-binding domain containing protein, expressed
Sobic.008G163700	bHLH	Common response	ME5	-2.01198	-2.32427	-2.20624	-1.75045	--	-1.8876	-2.47038	-2.82283	-2.64518	--	Transcription factor PIF4 GN=MFL8.13 OS=Arabidopsis thaliana (Mouse-ear cress) PE=1 SV=1	AT2G43010.1	PIF4,SRL2	phytochrome interacting factor 4	LOC_Os12g41650.2	helix-loop-helix DNA-binding domain containing protein, expressed
Sobic.010G214000	CO-like	Common response	ME5	-1.30383	-1.72483	-1.91969	-1.77668	--	--	-1.11296	-2.19521	-1.98195	--	Zinc finger protein CONSTANS-LIKE 5 GN=COL5 OS=Arabidopsis thaliana (Mouse-ear cress) PE=2 SV=2	AT2G24790.1	ATCOL3,COL3	CONSTANS-like 3	LOC_Os06g44450.1	CCT/B-box zinc finger protein, putative, expressed
Sobic.004G208400	DBB	Common response	ME5	--	-1.02728	-3.06635	-2.37838	--	--	--	-3.01522	-2.35649	--	Salt tolerance protein GN=STO OS=Arabidopsis thaliana (Mouse-ear cress) PE=1 SV=1	AT1G06040.1	STO	B-box zinc finger family protein	LOC_Os02g39360.1	B-box zinc finger family protein, putative, expressed
Sobic.007G132000	G2-like	Common response	ME5	-1.07755	--	--	--	--	--	--	--	--	--	Probable transcription factor RL9 GN=B1040D06.24 OS=Oryza sativa subsp. japonica (Rice) PE=2 SV=2	AT1G32240.1	KAN2	Homeodomain-like superfamily protein	LOC_Os08g33050.1	MYB family transcription factor, putative, expressed
Sobic.003G445800	GATA	Common response	ME5	--	--	2.43645	1.82896	--	--	--	--	--	--	GATA transcription factor 17 GN=GATA17 OS=Arabidopsis thaliana (Mouse-ear cress) PE=2 SV=1	AT4G16141.1	--	GATA type zinc finger transcription factor family protein	LOC_Os01g74540.1	GATA zinc finger domain containing protein, expressed
Sobic.001G169200	LBD	Common response	ME5	-2.53823	-2.34083	-2.00955	-2.15495	-1.38729	--	-1.55746	-1.43226	-1.87331	--	LOB domain-containing protein 39 GN=F19F18.30 OS=Arabidopsis thaliana (Mouse-ear cress) PE=2 SV=1	AT5G67420.1	ASL39,LBD37	LOB domain-containing protein 37	LOC_Os03g41330.1	DUF260 domain containing protein, putative, expressed
Sobic.003G223400	MYB_related	Common response	ME5	-1.17211	-1.53463	--	-1.76316	-1.37484	--	-1.27868	--	--	--	MYB-like transcription factor ETC3 GN=F2N1.40 OS=Arabidopsis thaliana (Mouse-ear cress) PE=2 SV=1	AT4G01060.1	CPL3,ETC3	CAPRICE-like MYB3	LOC_Os01g43230.2	expressed protein
Sobic.002G420700	NAC	Common response	ME5	-2.46641	-2.00378	-1.97495	-1.3847	--	-1.83358	-2.38707	-2.31787	--	--	NAC transcription factor NAM-B1 GN=NAM-B1 OS=Hordeum vulgare subsp. spontaneum (Wild barley) PE=4 SV=1	AT1G61110.1	anac025,NAC025	NAC domain containing protein 25	LOC_Os07g48450.1	no apical meristem protein, putative, expressed
Sobic.006G131800	DBB	Common response	ME6	--	--	--	-3.07922	--	--	--	--	-3.04311	--	Salt tolerance protein GN=STO OS=Arabidopsis thaliana (Mouse-ear cress) PE=1 SV=1	AT1G06040.1	STO	B-box zinc finger family protein	LOC_Os04g41560.2	B-box zinc finger family protein, putative, expressed
Sobic.001G476300	HD-ZIP	Common response	ME6	--	--	--	1.29002	--	-1.33342	--	--	1.389	--	Homeobox-leucine zipper protein HOX13 GN=OJ1217B09.11 OS=Oryza sativa subsp. japonica (Rice) PE=2 SV=1	AT4G40060.1	ATHB-16,ATHB16,HB16	homeobox protein 16	LOC_Os03g08960.1	homeobox associated leucine zipper, putative, expressed
Sobic.009G057600	B3	Common response	ME7	--	--	--	--	--	--	--	--	1.65695	--	B3 domain-containing protein Os03g0619600 OS=Oryza sativa subsp. japonica (Rice) PE=2 SV=1	AT4G33280.1	--	AP2/B3-like transcriptional factor family protein	LOC_Os03g42280.1	B3 DNA binding domain containing protein, expressed
Sobic.003G061400	bHLH	Common response	ME7	--	--	--	2.01109	--	--	--	--	--	--	Transcription factor bHLH51 GN=T7M7.8 OS=Arabidopsis thaliana (Mouse-ear cress) PE=2 SV=1	AT2G40200.1	--	basic helix-loop-helix (bHLH) DNA-binding superfamily protein	LOC_Os01g06640.1	basic helix-loop-helix, putative, expressed
Sobic.001G433000	FAR1	Common response	ME7	-1.3756	-1.32186	--	--	-1.76375	--	--	--	--	--	Protein FAR1-RELATED SEQUENCE 7 GN=FRS7 OS=Arabidopsis thaliana (Mouse-ear cress) PE=2 SV=1	AT5G18960.1	FRS12	FAR1-related sequence 12	LOC_Os03g15040.1	FAR1 family protein, expressed
Sobic.001G093200	HSF	Common response	ME7	--	1.38428	-2.42383	-6.14474	1.22299	--	1.49927	-2.10661	-5.95903	1.54115	Heat stress transcription factor A-2a OS=Oryza sativa subsp. japonica (Rice) PE=2 SV=1	AT3G22830.1	AT-HSFA6B,HSFA6B	heat shock transcription factor A6B	LOC_Os03g53340.1	HSF-type DNA-binding domain containing protein, expressed
Sobic.004G227400	ERF	Common response	ME8	--	--	--	--	--	4.28885	4.20589	5.1097	--	4.66211	Ethylene-responsive transcription factor ERF053 GN=ERF053 OS=Arabidopsis thaliana (Mouse-ear cress) PE=2 SV=1	AT2G20880.1	--	Integrase-type DNA-binding superfamily protein	LOC_Os02g42585.1	AP2 domain containing protein, expressed
Sobic.003G157300	GATA	Common response	ME9	--	--	--	-1.35848	--	--	--	--	-1.30643	--	GATA transcription factor 23 GN=GATA23 OS=Arabidopsis thaliana (Mouse-ear cress) PE=2 SV=2	AT5G49300.1	GATA16	GATA transcription factor 16	LOC_Os01g24070.1	GATA zinc finger domain containing protein, expressed
Sobic.007G118301	WRKY	Common response	ME11	--	--	--	-1.5582	-2.32948	--	--	--	--	--	Probable WRKY transcription factor 41 GN=WRKY41 OS=Arabidopsis thaliana (Mouse-ear cress) PE=2 SV=2	AT4G11070.1	AtWRKY41,WRKY41	WRKY family transcription factor	LOC_Os08g29660.1	WRKY69, expressed
Sobic.001G095700	bHLH	RIO specific response	ME1	--	-1.92843	1.93889	--	1.55482	--	--	3.36448	--	3.54539	Transcription factor bHLH92 GN=K9D7.15 OS=Arabidopsis thaliana (Mouse-ear cress) PE=2 SV=1	AT5G43650.1	BHLH92	basic helix-loop-helix (bHLH) DNA-binding superfamily protein	LOC_Os03g53020.1	helix-loop-helix DNA-binding domain containing protein, expressed
Sobic.006G127900	bHLH	RIO specific response	ME1	--	-1.83322	--	-1.42273	-1.80131	--	--	--	--	--	Transcription factor bHLH128 GN=T20M3.7 OS=Arabidopsis thaliana (Mouse-ear cress) PE=1 SV=1	AT1G05805.1	--	basic helix-loop-helix (bHLH) DNA-binding superfamily protein	LOC_Os04g41229.1	helix-loop-helix DNA-binding domain containing protein, expressed
Sobic.001G079500	C2H2	RIO specific response	ME1	1.05315	--	--	--	--	--	--	--	-1.18129	--	Zinc finger protein 1 OS=Triticum aestivum (Wheat) PE=2 SV=1	AT1G27730.1	STZ,ZAT10	salt tolerance zinc finger	LOC_Os03g55540.1	ZOS3-18 - C2H2 zinc finger protein, expressed
Sobic.009G155200	C2H2	RIO specific response	ME1	--	--	2.71971	2.31288	2.52929	--	--	2.5813	2.68382	4.73031	Protein TRANSPARENT TESTA 1 GN=TT1 OS=Arabidopsis thaliana (Mouse-ear cress) PE=2 SV=1	AT3G57670.1	NTT,WIP2	C2H2-type zinc finger family protein	LOC_Os05g37190.1	ZOS5-08 - C2H2 zinc finger protein, expressed
Sobic.007G189800	CO-like	RIO specific response	ME1	--	--	1.46258	--	--	--	1.04435	1.4195	--	--	Zinc finger protein CONSTANS-LIKE 15 GN=COL15 OS=Arabidopsis thaliana (Mouse-ear cress) PE=2 SV=1	AT1G28050.1	--	B-box type zinc finger protein with CCT domain	LOC_Os08g42440.1	CCT/B-box zinc finger protein, putative, expressed
Sobic.010G029900	DBB	RIO specific response	ME1	-1.42288	-2.76406	-2.98846	-7.51059	-6.4439	--	-1.35407	-2.3154	-2.27498	--	Zinc finger protein CONSTANS-LIKE 5 GN=COL5 OS=Arabidopsis thaliana (Mouse-ear cress) PE=2 SV=2
Sobic.003G297600	ERF	RIO specific response	ME1	3.50098	3.63319	2.53191	--	--	1.77003	1.90816	--	--	--	Pathogenesis-related genes transcriptional activator PTI5 GN=PTI5 OS=Solanum lycopersicum (Tomato) PE=2 SV=1	AT2G44840.1	ATERF13,EREBP,ERF13	ethylene-responsive element binding factor 13	LOC_Os01g54890.1	ethylene-responsive transcription factor 2, putative, expressed
Sobic.004G295500	ERF	RIO specific response	ME1	1.21351	--	--	--	--	--	--	--	--	--	Ethylene-responsive transcription factor ERF034 OS=Arabidopsis thaliana (Mouse-ear cress) PE=2 SV=2	AT2G44940.1	--	Integrase-type DNA-binding superfamily protein	LOC_Os02g43970.1	AP2 domain containing protein, expressed
Sobic.006G169900	ERF	RIO specific response	ME1	1.30754	--	--	--	--	--	--	--	--	--	Ethylene-responsive transcription factor ERF034 OS=Arabidopsis thaliana (Mouse-ear cress) PE=2 SV=2	AT2G44940.1	--	Integrase-type DNA-binding superfamily protein	LOC_Os04g46400.1	AP2 domain containing protein, expressed
Sobic.010G052600	ERF	RIO specific response	ME1	--	-1.03175	--	--	--	--	--	--	--	--	Ethylene-responsive transcription factor ERF008 GN=ERF008 OS=Arabidopsis thaliana (Mouse-ear cress) PE=2 SV=1	AT2G23340.1	DEAR3	DREB and EAR motif protein 3	LOC_Os06g07030.1	AP2 domain containing protein, expressed
Sobic.006G202300	G2-like	RIO specific response	ME1	1.25443	1.47835	--	-1.6395	--	1.20704	1.07617	--	--	--	Myb family transcription factor APL GN=APL OS=Arabidopsis thaliana (Mouse-ear cress) PE=2 SV=2	AT5G45580.1	--	Homeodomain-like superfamily protein	LOC_Os02g47190.1	MYB family transcription factor, putative, expressed
Sobic.009G050600	GATA	RIO specific response	ME1	--	--	--	--	-1.15372	--	--	--	--	--	GATA transcription factor 23 GN=GATA23 OS=Arabidopsis thaliana (Mouse-ear cress) PE=2 SV=2	AT5G26930.1	GATA23	GATA transcription factor 23	LOC_Os01g24070.1	GATA zinc finger domain containing protein, expressed
Sobic.010G170600	HSF	RIO specific response	ME1	1.68465	1.35906	--	--	--	--	1.48243	--	--	--	Putative heat stress transcription factor A-6a OS=Oryza sativa subsp. japonica (Rice) PE=2 SV=1	AT3G51910.1	AT-HSFA7A,HSFA7A	heat shock transcription factor A7A	LOC_Os06g36930.1	HSF-type DNA-binding domain containing protein, expressed
Sobic.002G201000	MYB	RIO specific response	ME1	--	-1.14425	-1.68562	--	-1.18627	--	--	-1.79466	--	--	Myb-related protein 306 GN=MYB306 OS=Antirrhinum majus (Garden snapdragon) PE=2 SV=1	AT3G28910.1	ATMYB30,MYB30	myb domain protein 30	LOC_Os08g33940.1	MYB family transcription factor, putative, expressed
Sobic.003G373000	MYB	RIO specific response	ME1	1.07428	--	--	--	--	--	--	--	--	--	Myb-related protein 308 GN=MYB308 OS=Antirrhinum majus (Garden snapdragon) PE=2 SV=1	AT4G09460.1	AtMYB6,MYB6	myb domain protein 6	LOC_Os01g65370.1	MYB family transcription factor, putative, expressed
Sobic.004G231700	MYB	RIO specific response	ME1	--	--	--	-1.53896	--	--	--	--	--	--	Transcription factor MYB39 GN=dl4925c OS=Arabidopsis thaliana (Mouse-ear cress) PE=2 SV=1	AT1G34670.1	AtMYB93,MYB93	myb domain protein 93	LOC_Os06g11780.1	MYB family transcription factor, putative, expressed
Sobic.004G273800	MYB	RIO specific response	ME1	--	--	-2.10102	-2.09784	--	--	--	--	--	--	Myb-related protein Zm1 OS=Zea mays (Maize) PE=2 SV=1	AT1G79180.1	ATMYB63,MYB63	myb domain protein 63	LOC_Os02g46780.1	MYB family transcription factor, putative, expressed
Sobic.005G020200	MYB	RIO specific response	ME1	1.05401	--	-1.94465	-2.75506	--	--	--	--	--	--	Myb-related protein 306 GN=MYB306 OS=Antirrhinum majus (Garden snapdragon) PE=2 SV=1	AT1G08810.1	AtMYB60,MYB60	myb domain protein 60	LOC_Os11g03440.1	myb-like DNA-binding domain containing protein, putative, expressed
Sobic.007G224800	MYB	RIO specific response	ME1	1.44926	--	--	--	--	--	--	-1.82298	--	--	Transcription factor MYB39 GN=dl4925c OS=Arabidopsis thaliana (Mouse-ear cress) PE=2 SV=1	AT1G34670.1	AtMYB93,MYB93	myb domain protein 93	LOC_Os08g37970.1	MYB family transcription factor, putative, expressed
Sobic.003G211200	MYB_related	RIO specific response	ME1	--	--	-3.41894	-1.43086	--	--	--	-2.1627	-1.10042	--	Transcription factor MYB1R1 OS=Solanum tuberosum (Potato) PE=2 SV=1	AT5G47390.1	--	myb-like transcription factor family protein	LOC_Os01g41900.1	Myb transcription factor, putative, expressed
Sobic.001G163800	NAC	RIO specific response	ME1	--	--	-1.76625	-1.99412	--	--	--	--	--	--	Protein CUP-SHAPED COTYLEDON 2 GN=K19P17.12 OS=Arabidopsis thaliana (Mouse-ear cress) PE=1 SV=1	AT3G18400.1	anac058,NAC058	NAC domain containing protein 58	LOC_Os03g42630.1	No apical meristem protein, putative, expressed
Sobic.004G316500	NF-YA	RIO specific response	ME1	--	--	--	--	-1.46842	--	--	--	--	--	Nuclear transcription factor Y subunit A-5 GN=NFYA5 OS=Arabidopsis thaliana (Mouse-ear cress) PE=2 SV=1	AT1G17590.3	NF-YA8	nuclear factor Y, subunit A8	LOC_Os02g53620.1	nuclear transcription factor Y subunit, putative, expressed
Sobic.007G063200	NF-YC	RIO specific response	ME1	-4.55805	--	--	--	--	-4.49078	--	--	--	--	Nuclear transcription factor Y subunit C-2 OS=Arabidopsis thaliana (Mouse-ear cress) PE=2 SV=2	AT1G56170.1	ATHAP5B,HAP5B,NF-YC2	nuclear factor Y, subunit C2	LOC_Os02g07450.1	core histone H2A/H2B/H3/H4, putative, expressed
Sobic.003G199400	WRKY	RIO specific response	ME1	--	--	--	-1.78626	-1.48042	--	--	--	--	--	Probable WRKY transcription factor 50 GN=WRKY50 OS=Arabidopsis thaliana (Mouse-ear cress) PE=2 SV=1	AT5G26170.1	ATWRKY50,WRKY50	WRKY DNA-binding protein 50	LOC_Os01g40260.1	WRKY77, expressed
Sobic.007G077532	WRKY	RIO specific response	ME1	--	--	-1.64346	-1.96255	--	--	--	--	--	--	NEDD8-specific protease 1 GN=F15L12.8 OS=Arabidopsis thaliana (Mouse-ear cress) PE=2 SV=1	AT5G60190.1	--	Cysteine proteinases superfamily protein	LOC_Os12g01180.1	WRKY57, expressed
Sobic.004G221400	ARF	RIO specific response	ME2	--	--	-1.90261	--	--	--	--	--	--	--	Auxin response factor 8 OS=Oryza sativa subsp. japonica (Rice) PE=2 SV=1	AT2G28350.1	ARF10	auxin response factor 10	LOC_Os02g41800.1	auxin response factor, putative, expressed
Sobic.007G051800	bHLH	RIO specific response	ME2	--	--	2.89478	--	1.88672	--	--	3.17218	--	4.16606	Transcription factor bHLH35 GN=MUL3.10 OS=Arabidopsis thaliana (Mouse-ear cress) PE=2 SV=1	AT5G57150.1	--	basic helix-loop-helix (bHLH) DNA-binding superfamily protein	LOC_Os04g23550.1	basic helix-loop-helix family protein, putative, expressed
Sobic.003G327000	bZIP	RIO specific response	ME2	1.88891	--	2.42687	--	--	--	--	--	--	--	--	AT2G16770.1	bZIP23	Basic-leucine zipper (bZIP) transcription factor family protein	LOC_Os01g58760.1	bZIP transcription factor domain containing protein, expressed
Sobic.009G182800	bZIP	RIO specific response	ME2	--	--	1.56525	--	--	--	--	--	--	--	Light-inducible protein CPRF2 GN=CPRF2 OS=Petroselinum crispum (Parsley) PE=2 SV=2	AT2G16770.1	bZIP23	Basic-leucine zipper (bZIP) transcription factor family protein	LOC_Os05g41540.1	bZIP transcription factor domain containing protein, expressed
Sobic.010G194900	bZIP	RIO specific response	ME2	--	1.04326	1.49989	--	--	--	--	--	--	--	bZIP transcription factor 60 GN=BZIP60 OS=Arabidopsis thaliana (Mouse-ear cress) PE=2 SV=1	AT1G42990.1	ATBZIP60,BZIP60	basic region/leucine zipper motif 60	LOC_Os06g41770.1	bZIP transcription factor domain containing protein, expressed
Sobic.001G441500	C2H2	RIO specific response	ME2	-2.17438	--	1.71632	--	--	--	--	--	--	--	Zinc finger protein 4 GN=ZFP4 OS=Arabidopsis thaliana (Mouse-ear cress) PE=2 SV=2	AT1G66140.1	ZFP4	zinc finger protein 4	LOC_Os03g13600.1	ZOS3-07 - C2H2 zinc finger protein, expressed
Sobic.003G396600	C2H2	RIO specific response	ME2	--	--	2.2665	--	--	--	--	--	--	-1.761	Histone deacetylase HDT3 GN=HDT3 OS=Zea mays (Maize) PE=2 SV=1	AT3G44750.1	ATHD2A,HD2A,HDA3,HDT1	histone deacetylase 3	LOC_Os05g51830.1	ZOS5-12 - C2H2 zinc finger protein, expressed
Sobic.004G249500	CO-like	RIO specific response	ME2	-1.17024	--	2.66156	--	1.18103	--	--	2.2497	--	--	Zinc finger protein CONSTANS-LIKE 16 GN=COL16 OS=Arabidopsis thaliana (Mouse-ear cress) PE=2 SV=2	AT1G68520.1	--	B-box type zinc finger protein with CCT domain	LOC_Os02g49880.1	CCT/B-box zinc finger protein, putative, expressed
Sobic.010G108500	CO-like	RIO specific response	ME2	--	--	4.04094	2.9761	--	--	--	3.13446	2.92969	--	Zinc finger protein CONSTANS-LIKE 16 GN=COL16 OS=Arabidopsis thaliana (Mouse-ear cress) PE=2 SV=2	AT1G25440.1	--	B-box type zinc finger protein with CCT domain	LOC_Os06g15330.1	CCT/B-box zinc finger protein, putative, expressed
Sobic.002G269300	ERF	RIO specific response	ME2	--	--	1.6368	-2.23526	--	1.4762	--	--	-3.02836	--	Dehydration-responsive element-binding protein 1A GN=DREB1A OS=Oryza sativa subsp. indica (Rice) PE=2 SV=1	AT4G25480.1	ATCBF3,CBF3,DREB1A	dehydration response element B1A	LOC_Os09g35030.1	dehydration-responsive element-binding protein, putative, expressed
Sobic.006G167800	ERF	RIO specific response	ME2	--	-1.21686	--	-1.48884	--	1.24995	--	--	-1.6549	-1.75675	Ethylene-responsive transcription factor 2 GN=ERF2 OS=Nicotiana tabacum (Common tobacco) PE=2 SV=1	AT4G17500.1	ATERF-1,ERF-1	ethylene responsive element binding factor 1	LOC_Os04g46220.1	ethylene-responsive transcription factor, putative, expressed
Sobic.010G254300	G2-like	RIO specific response	ME2	--	--	-2.46102	--	--	--	--	-1.35342	--	--	Protein PHR1-LIKE 1 GN=PHL1 OS=Arabidopsis thaliana (Mouse-ear cress) PE=1 SV=1	AT3G13040.2	--	myb-like HTH transcriptional regulator family protein	LOC_Os06g49040.1	Myb-like DNA-binding domain containing protein, putative, expressed
Sobic.003G112700	GeBP	RIO specific response	ME2	--	--	--	--	-1.36697	--	--	--	--	--	Mediator-associated protein 1 GN=At4g25210 OS=Arabidopsis thaliana (Mouse-ear cress) PE=1 SV=1	AT5G28040.1	--	DNA-binding storekeeper protein-related transcriptional regulator	LOC_Os01g14720.1	transcription regulator, putative, expressed
Sobic.002G354900	GRAS	RIO specific response	ME2	--	--	1.5401	--	--	--	--	--	--	--	Chitin-inducible gibberellin-responsive protein 2 GN=OJ1127_E01.113 OS=Oryza sativa subsp. japonica (Rice) PE=2 SV=1	AT1G50600.1	SCL5	scarecrow-like 5	LOC_Os07g39470.1	gibberellin response modulator protein, putative, expressed
Sobic.010G078700	HD-ZIP	RIO specific response	ME2	--	--	-1.69993	--	--	--	--	-1.39759	--	-3.36557	Homeobox-leucine zipper protein ROC8 OS=Oryza sativa subsp. japonica (Rice) PE=2 SV=2	AT1G73360.1	ATHDG11,EDT1,HDG11	homeodomain GLABROUS 11	LOC_Os06g10600.1	homeobox and START domains containing protein, putative, expressed
Sobic.003G286700	HSF	RIO specific response	ME2	--	--	5.69181	4.8029	3.71522	--	2.28165	4.50861	4.99278	4.06168	Heat stress transcription factor C-1b OS=Oryza sativa subsp. japonica (Rice) PE=2 SV=1	AT3G24520.1	AT-HSFC1,HSFC1	heat shock transcription factor C1	LOC_Os01g53220.1	HSF-type DNA-binding domain containing protein, expressed
Sobic.007G177100	MYB	RIO specific response	ME2	--	--	2.00023	--	--	1.60565	1.29026	--	--	--	Myb-related protein Zm38 OS=Zea mays (Maize) PE=2 SV=1	AT4G34990.1	AtMYB32,MYB32	myb domain protein 32	LOC_Os08g43550.1	MYB family transcription factor, putative, expressed
Sobic.003G036600	MYB_related	RIO specific response	ME2	--	--	1.67666	--	1.20662	--	--	1.50689	--	1.94397	Transcription factor MYB1R1 OS=Solanum tuberosum (Potato) PE=2 SV=1	AT5G47390.1	--	myb-like transcription factor family protein	LOC_Os01g09280.1	myb-related transcription activator, putative, expressed
Sobic.003G246900	MYB_related	RIO specific response	ME2	--	--	2.40029	--	--	--	--	2.51307	--	1.88285	Protein RADIALIS-like 3 GN=RL3 OS=Arabidopsis thaliana (Mouse-ear cress) PE=2 SV=1	AT1G75250.1	ATRL6,RL6,RSM3	RAD-like 6	LOC_Os01g47370.1	MYB family transcription factor, putative, expressed
Sobic.009G244300	MYB_related	RIO specific response	ME2	--	--	--	-1.20648	--	--	--	--	-1.93913	--	Protein RADIALIS-like 3 GN=RL3 OS=Arabidopsis thaliana (Mouse-ear cress) PE=2 SV=1	AT1G75250.1	ATRL6,RL6,RSM3	RAD-like 6	LOC_Os05g50340.1	MYB family transcription factor, putative, expressed
Sobic.002G259600	NAC	RIO specific response	ME2	--	--	1.91829	--	--	--	--	--	--	-1.64707	NAC transcription factor ONAC010 OS=Oryza sativa subsp. japonica (Rice) PE=2 SV=1	AT2G33480.1	ANAC041,NAC041	NAC domain containing protein 41	LOC_Os09g33490.1	no apical meristem protein, putative, expressed
Sobic.003G334600	NAC	RIO specific response	ME2	1.44352	1.96544	3.00741	--	2.16591	2.94034	1.83769	2.61174	--	2.13993	NAC domain-containing protein 68 OS=Oryza sativa subsp. japonica (Rice) PE=2 SV=1	AT5G08790.1	anac081,ATAF2	NAC (No Apical Meristem) domain transcriptional regulator superfamily protein	LOC_Os01g60020.1	NAC domain transcription factor, putative, expressed
Sobic.004G191700	NAC	RIO specific response	ME2	-1.78909	--	--	--	--	--	--	--	--	--	NAC domain-containing protein 100 GN=NAC100 OS=Arabidopsis thaliana (Mouse-ear cress) PE=2 SV=1	AT5G61430.1	ANAC100,ATNAC5,NAC100	NAC domain containing protein 100	LOC_Os02g36880.1	No apical meristem protein, putative, expressed
Sobic.002G268600	TCP	RIO specific response	ME2	--	--	2.24738	--	--	--	--	--	--	--	Transcription factor PCF2 OS=Oryza sativa subsp. japonica (Rice) PE=1 SV=1	AT2G45680.1	--	TCP family transcription factor	LOC_Os08g43160.1	TCP family transcription factor, putative, expressed
Sobic.006G025000	TCP	RIO specific response	ME2	2.42618	2.67174	3.35007	--	--	--	--	--	--	--	Transcription factor PCF1 OS=Oryza sativa subsp. japonica (Rice) PE=1 SV=1	AT1G69690.1	--	TCP family transcription factor	LOC_Os04g11830.1	TCP family transcription factor, putative, expressed
Sobic.001G534300	Trihelix	RIO specific response	ME2	--	--	-1.58754	--	--	--	--	--	--	--	Trihelix transcription factor GTL1 GN=GTL1 OS=Arabidopsis thaliana (Mouse-ear cress) PE=1 SV=2	AT1G76890.2	AT-GT2,GT2	Duplicated homeodomain-like superfamily protein	LOC_Os03g02240.1	AT-GTL1, putative, expressed
Sobic.004G059100	Trihelix	RIO specific response	ME2	--	--	1.48317	--	--	--	--	--	--	--	Formin-like protein 5 GN=P0453E05.107 OS=Oryza sativa subsp. japonica (Rice) PE=2 SV=2	AT4G31270.1	--	sequence-specific DNA binding transcription factors	LOC_Os02g07800.1	transcription factor, putative, expressed
Sobic.004G047500	Whirly	RIO specific response	ME2	--	--	2.87829	--	--	--	--	--	--	-2.14981	Single-stranded DNA-bindig protein WHY2, mitochondrial (Precursor) GN=WHY2 OS=Solanum tuberosum (Potato) PE=1 SV=1	AT1G71260.1	ATWHY2,WHY2	WHIRLY 2	LOC_Os02g06370.1	whirly transcription factor domain containing protein, expressed
Sobic.001G084000	WRKY	RIO specific response	ME2	--	--	1.97586	--	--	--	--	--	--	2.20172	Probable WRKY transcription factor 48 GN=WRKY48 OS=Arabidopsis thaliana (Mouse-ear cress) PE=2 SV=1	AT1G69310.2	ATWRKY57,WRKY57	WRKY DNA-binding protein 57	LOC_Os03g55080.1	WRKY3, expressed
Sobic.002G128400	WRKY	RIO specific response	ME2	--	1.04062	3.09545	2.25919	--	--	1.30265	2.27805	2.24099	--	WRKY transcription factor 55 GN=WRKY55 OS=Arabidopsis thaliana (Mouse-ear cress) PE=2 SV=1	AT2G40740.1	ATWRKY55,WRKY55	WRKY DNA-binding protein 55	LOC_Os07g27670.1	WRKY115, expressed
Sobic.002G202700	WRKY	RIO specific response	ME2	--	--	2.42434	-1.75824	--	--	--	--	--	--	Probable WRKY transcription factor 40 GN=WRKY40 OS=Arabidopsis thaliana (Mouse-ear cress) PE=1 SV=1	AT1G80840.1	ATWRKY40,WRKY40	WRKY DNA-binding protein 40	LOC_Os09g25060.1	WRKY76, expressed
Sobic.007G139200	ZF-HD	RIO specific response	ME2	--	--	1.53279	--	--	--	--	--	--	--	Transcription factor HB29 GN=F24J1.29 OS=Arabidopsis thaliana (Mouse-ear cress) PE=1 SV=1	AT1G69600.1	ATHB29,ZFHD1	zinc finger homeodomain 1	LOC_Os09g24820.1	ZF-HD protein dimerisation region containing protein, expressed
Sobic.003G017601	bHLH	RIO specific response	ME3	--	--	--	--	1.36146	--	--	--	--	--	Transcription factor bHLH30 OS=Arabidopsis thaliana (Mouse-ear cress) PE=1 SV=1	AT1G68810.1	--	basic helix-loop-helix (bHLH) DNA-binding superfamily protein	LOC_Os01g11910.1	basic helix-loop-helix, putative, expressed
Sobic.005G131900	bHLH	RIO specific response	ME3	--	--	--	--	-1.27873	--	--	--	--	-2.44651	Transcription factor ICE1 OS=Arabidopsis thaliana (Mouse-ear cress) PE=1 SV=1	AT3G26744.1	ATICE1,ICE1,SCRM	basic helix-loop-helix (bHLH) DNA-binding superfamily protein	LOC_Os11g32100.1	inducer of CBF expression 1, putative, expressed
Sobic.007G062200	bHLH	RIO specific response	ME3	--	--	--	--	1.702	--	--	--	--	--	Transcription factor bHLH112 GN=T13M11.1 OS=Arabidopsis thaliana (Mouse-ear cress) PE=2 SV=1	AT1G61660.1	--	basic helix-loop-helix (bHLH) DNA-binding superfamily protein	LOC_Os08g08160.1	expressed protein
Sobic.003G007700	bHLH	RIO specific response	ME3	--	--	--	--	1.46716	--	--	--	--	--	Transcription factor bHLH68 GN=F19B15.130 OS=Arabidopsis thaliana (Mouse-ear cress) PE=2 SV=2	AT4G29100.1	--	basic helix-loop-helix (bHLH) DNA-binding superfamily protein	LOC_Os05g14010.1	ethylene-responsive protein related, putative, expressed
Sobic.003G021800	bZIP	RIO specific response	ME3	--	--	--	--	-1.27938	--	--	--	--	-2.66677	Transcription factor RF2a OS=Oryza sativa subsp. japonica (Rice) PE=1 SV=1	AT3G58120.1	ATBZIP61,BZIP61	Basic-leucine zipper (bZIP) transcription factor family protein	LOC_Os01g11350.1	bZIP transcription factor domain containing protein, expressed
Sobic.003G300100	bZIP	RIO specific response	ME3	--	--	--	--	-1.57865	--	--	--	--	-2.06576	Transcription factor RF2b GN=RF2b OS=Oryza sativa subsp. japonica (Rice) PE=1 SV=1	AT2G42380.2	ATBZIP34,BZIP34	Basic-leucine zipper (bZIP) transcription factor family protein	LOC_Os01g55150.1	bZIP transcription factor domain containing protein, expressed
Sobic.009G237600	bZIP	RIO specific response	ME3	1.1773	--	--	--	1.80964	--	1.0822	--	--	--	Common plant regulatory factor 1 GN=CPRF1 OS=Petroselinum crispum (Parsley) PE=2 SV=1	AT2G46270.1	GBF3	G-box binding factor 3	LOC_Os05g49420.1	transcription factor, putative, expressed
Sobic.010G081800	bZIP	RIO specific response	ME3	--	--	-1.90559	--	1.19423	--	--	--	--	--	bZIP transcription factor TRAB1 OS=Oryza sativa subsp. japonica (Rice) PE=1 SV=1	AT1G45249.1	ABF2,AREB1,ATAREB1	abscisic acid responsive elements-binding factor 2	LOC_Os06g10880.1	bZIP transcription factor, putative, expressed
Sobic.002G247500	EIL	RIO specific response	ME3	--	--	--	-5.64861	--	--	--	--	--	--	ETHYLENE INSENSITIVE 3-like 3 protein GN=EIL3 OS=Arabidopsis thaliana (Mouse-ear cress) PE=1 SV=1	AT1G73730.1	AtEIL3,ATSLIM,EIL3,SLIM1	ETHYLENE-INSENSITIVE3-like 3	LOC_Os09g31400.1	ethylene-insensitive 3, putative, expressed
Sobic.001G296300	ERF	RIO specific response	ME3	--	--	--	--	-1.94978	--	--	--	--	--	Ethylene-responsive transcription factor 5 GN=ERF5 OS=Nicotiana tabacum (Common tobacco) PE=2 SV=1	AT5G47230.1	ATERF-5,ATERF5,ERF5	ethylene responsive element binding factor 5	LOC_Os10g41330.1	AP2 domain containing protein, expressed
Sobic.002G081300	ERF	RIO specific response	ME3	--	--	--	-1.23527	--	--	--	--	-1.31691	--	Ethylene-responsive transcription factor LEP GN=MAC12.13 OS=Arabidopsis thaliana (Mouse-ear cress) PE=2 SV=1	AT4G27950.1	CRF4	cytokinin response factor 4	LOC_Os03g60120.1	AP2 domain containing protein, expressed
Sobic.002G189000	HD-ZIP	RIO specific response	ME3	--	--	--	--	1.32094	--	--	--	--	1.58285	Homeobox-leucine zipper protein HOX25 OS=Oryza sativa subsp. japonica (Rice) PE=2 SV=2	AT3G01470.1	ATHB-1,ATHB1,HAT5,HB-1,HD-ZIP-1	homeobox 1	LOC_Os09g21180.1	homeobox associated leucine zipper, putative, expressed
Sobic.010G164400	HSF	RIO specific response	ME3	1.42333	--	--	2.83644	3.05848	1.9531	1.78064	--	3.21057	2.80292	Heat stress transcription factor C-2b OS=Oryza sativa subsp. japonica (Rice) PE=2 SV=1	AT3G24520.1	AT-HSFC1,HSFC1	heat shock transcription factor C1	LOC_Os06g35960.1	HSF-type DNA-binding domain containing protein, expressed
Sobic.003G231700	MYB_related	RIO specific response	ME3	--	--	--	-4.96432	-3.42528	--	--	-2.42462	-3.3806	-2.4859	Protein RADIALIS-like 3 GN=RL3 OS=Arabidopsis thaliana (Mouse-ear cress) PE=2 SV=1	AT1G75250.1	ATRL6,RL6,RSM3	RAD-like 6	LOC_Os01g44370.1	MYB family transcription factor, putative
Sobic.003G231800	MYB_related	RIO specific response	ME3	--	--	--	-2.45158	-1.84106	--	-1.00216	--	-2.37206	-1.65859	Protein RADIALIS-like 3 GN=RL3 OS=Arabidopsis thaliana (Mouse-ear cress) PE=2 SV=1	AT4G39250.1	ATRL1,RL1,RSM2	RAD-like 1	LOC_Os05g50340.1	MYB family transcription factor, putative, expressed
Sobic.001G066100	TCP	RIO specific response	ME3	--	-3.85307	--	-3.65544	--	--	--	-1.8339	-6.23062	-5.95374	Transcription factor PCF6 GN=PCF6 OS=Oryza sativa subsp. indica (Rice) PE=2 SV=1	AT4G18390.1	TCP2	TEOSINTE BRANCHED 1, cycloidea and PCF transcription factor 2	LOC_Os03g57190.1	TCP family transcription factor, putative, expressed
Sobic.005G086700	ZF-HD	RIO specific response	ME3	--	--	--	--	-4.27156	1.46406	--	--	--	--	ZF-HD homeobox protein At5g65410 GN=At5g65410 OS=Arabidopsis thaliana (Mouse-ear cress) PE=1 SV=1	AT2G02540.1	ATHB21,HB21,ZFHD4	homeobox protein 21	LOC_Os11g13930.1	ZF-HD protein dimerisation region containing protein, expressed
Sobic.007G224400	bZIP	RIO specific response	ME4	--	--	-1.8212	-2.55942	--	--	--	--	-2.17654	-1.85123	Basic leucine zipper 63 GN=T32B20.4 OS=Arabidopsis thaliana (Mouse-ear cress) PE=1 SV=1	AT1G13600.1	AtbZIP58,bZIP58	basic leucine-zipper 58	LOC_Os08g38020.1	bZIP transcription factor domain containing protein, expressed
Sobic.010G207600	bZIP	RIO specific response	ME4	--	--	-1.91374	--	--	--	--	-1.68648	--	--	Formin-like protein 5 GN=P0453E05.107 OS=Oryza sativa subsp. japonica (Rice) PE=2 SV=2	AT4G36730.2	GBF1	G-box binding factor 1	LOC_Os06g43870.2	expressed protein
Sobic.010G190400	C2H2	RIO specific response	ME4	1.47716	--	--	--	--	--	--	--	--	-2.1124	Protein TRANSPARENT TESTA 1 GN=TT1 OS=Arabidopsis thaliana (Mouse-ear cress) PE=2 SV=1	AT3G57670.1	NTT,WIP2	C2H2-type zinc finger family protein	LOC_Os06g40960.1	ZOS6-05 - C2H2 zinc finger protein, expressed
Sobic.002G343300	C3H	RIO specific response	ME4	--	--	--	-4.01663	--	--	--	-1.98103	--	--	Zinc finger CCCH domain-containing protein 50 OS=Oryza sativa subsp. japonica (Rice) PE=2 SV=1	AT2G41900.1	--	CCCH-type zinc finger protein with ARM repeat domain	LOC_Os07g38090.1	zinc finger family protein, putative, expressed
Sobic.006G051800	CAMTA	RIO specific response	ME4	--	--	--	-1.39366	--	--	--	--	--	1.54226	Calmodulin-binding transcription activator 4 GN=F1N21.13 OS=Arabidopsis thaliana (Mouse-ear cress) PE=1 SV=1	AT5G09410.3	CAMTA1,EICBP.B	ethylene induced calmodulin binding protein	LOC_Os04g31900.1	calmodulin-binding transcription activator 4, putative, expressed
Sobic.010G089700	ERF	RIO specific response	ME4	--	--	--	-1.59054	--	--	--	--	--	--	Ethylene-responsive transcription factor RAP2-4 OS=Arabidopsis thaliana (Mouse-ear cress) PE=1 SV=1	AT1G78080.1	RAP2.4	related to AP2 4	LOC_Os06g11860.1	ethylene-responsive transcription factor, putative, expressed
Sobic.001G070600	FAR1	RIO specific response	ME4	--	--	--	-1.37811	--	--	--	--	--	--	Protein FAR1-RELATED SEQUENCE 5 GN=FRS5 OS=Arabidopsis thaliana (Mouse-ear cress) PE=2 SV=1	AT4G38180.1	FRS5	FAR1-related sequence 5	LOC_Os03g15040.2	FAR1 family protein, expressed
Sobic.003G002600	G2-like	RIO specific response	ME4	--	--	-1.76242	--	--	--	--	--	--	--	Probable transcription factor GLK2 OS=Oryza sativa subsp. japonica (Rice) PE=2 SV=1	AT2G20570.1	ATGLK1,GLK1,GPRI1	GBF\'s pro-rich region-interacting factor 1	LOC_Os01g13740.1	myb-like DNA-binding domain containing protein, expressed
Sobic.001G304500	GRAS	RIO specific response	ME4	--	--	--	-2.72687	--	--	--	--	-1.23622	--	Scarecrow-like protein 6 GN=SCL6 OS=Arabidopsis thaliana (Mouse-ear cress) PE=1 SV=1	AT4G00150.1	ATHAM3,HAM3	GRAS family transcription factor	LOC_Os10g40390.1	scarecrow, putative, expressed
Sobic.007G226600	HD-ZIP	RIO specific response	ME4	-1.14133	--	--	--	-1.24091	--	-1.07696	--	--	--	Homeobox-leucine zipper protein HOX4 GN=OJ1595_D08.21 OS=Oryza sativa subsp. japonica (Rice) PE=1 SV=1	AT4G40060.1	ATHB-16,ATHB16,HB16	homeobox protein 16	LOC_Os09g29460.1	homeobox associated leucine zipper, putative, expressed
Sobic.009G199300	LBD	RIO specific response	ME4	--	--	--	-2.12834	--	--	-1.13295	--	--	--	LOB domain-containing protein 41 GN=F16B3.18 OS=Arabidopsis thaliana (Mouse-ear cress) PE=2 SV=1	AT3G02550.1	LBD41	LOB domain-containing protein 41	LOC_Os01g32770.1	DUF260 domain containing protein, putative, expressed
Sobic.002G141300	MYB	RIO specific response	ME4	--	--	--	-1.42265	--	--	--	--	--	--	Transcription factor MYB44 GN=K8K14.2 OS=Arabidopsis thaliana (Mouse-ear cress) PE=2 SV=1	AT5G67300.1	ATMYB44,ATMYBR1,MYB44,MYBR1	myb domain protein r1	LOC_Os09g01960.1	MYB family transcription factor, putative, expressed
Sobic.006G199800	MYB	RIO specific response	ME4	1.22291	--	--	--	--	--	--	--	--	--	Myb-related protein Zm1 OS=Zea mays (Maize) PE=2 SV=1	AT1G79180.1	ATMYB63,MYB63	myb domain protein 63	LOC_Os04g50770.1	MYB family transcription factor, putative, expressed
Sobic.007G178300	MYB	RIO specific response	ME4	1.98088	--	--	--	--	--	--	--	--	--	Protein ODORANT1 GN=ODO1 OS=Petunia hybrida (Petunia) PE=2 SV=1	AT4G12350.1	AtMYB42,MYB42	myb domain protein 42	LOC_Os09g36250.1	MYB family transcription factor, putative, expressed
Sobic.002G257900	SBP	RIO specific response	ME4	--	--	-1.95272	--	--	--	--	--	--	--	Squamosa promoter-binding-like protein 18 GN=SPL18 OS=Oryza sativa subsp. japonica (Rice) PE=2 SV=1	AT5G50570.1	--	Squamosa promoter-binding protein-like (SBP domain) transcription factor family protein	LOC_Os09g32944.1	OsSPL18 - SBP-box gene family member, expressed
Sobic.009G135000	SBP	RIO specific response	ME4	--	--	--	-1.3523	--	--	--	--	--	--	Squamosa promoter-binding-like protein 9 OS=Oryza sativa subsp. japonica (Rice) PE=2 SV=1	AT5G18830.3	ATSPL7,SPL7	squamosa promoter binding protein-like 7	LOC_Os05g33810.1	OsSPL9 - SBP-box gene family member, expressed
Sobic.006G084201	ZF-HD	RIO specific response	ME4	--	--	--	-3.15004	--	1.08913	--	--	-1.98841	--	ZF-HD homeobox protein At5g65410 GN=At5g65410 OS=Arabidopsis thaliana (Mouse-ear cress) PE=1 SV=1	AT1G75240.1	AtHB33,HB33	homeobox protein 33	LOC_Os08g37400.1	ZF-HD homeobox protein, putative, expressed
Sobic.004G207200	bHLH	RIO specific response	ME5	--	--	-1.55459	-1.78694	--	--	--	--	-1.14915	--	Transcription factor bHLH128 GN=T20M3.7 OS=Arabidopsis thaliana (Mouse-ear cress) PE=1 SV=1	AT1G05805.1	--	basic helix-loop-helix (bHLH) DNA-binding superfamily protein	LOC_Os02g39140.1	helix-loop-helix DNA-binding domain containing protein, expressed
Sobic.004G026700	bZIP	RIO specific response	ME5	--	--	-1.60549	-2.13218	--	--	--	-1.33673	-1.72484	--	Transcription factor HBP-1a OS=Triticum aestivum (Wheat) PE=2 SV=1	AT1G32150.1	AtbZIP68,bZIP68	basic region/leucine zipper transcription factor 68	LOC_Os02g03580.1	transcription factor, putative, expressed
Sobic.010G199000	bZIP	RIO specific response	ME5	--	--	-2.80676	--	--	--	--	--	--	2.24429	Vegetative cell wall protein gp1 (Precursor) GN=GP1 OS=Chlamydomonas reinhardtii (Chlamydomonas smithii) PE=2 SV=1	AT3G30530.1	ATBZIP42,bZIP42	basic leucine-zipper 42	LOC_Os06g42690.1	bZIP transcription factor domain containing protein, expressed
Sobic.001G118100	CO-like	RIO specific response	ME5	-1.0125	-1.42382	-2.24631	-2.9542	-1.40272	--	--	-2.59425	-3.27873	--	Zinc finger protein CONSTANS-LIKE 16 GN=COL16 OS=Arabidopsis thaliana (Mouse-ear cress) PE=2 SV=2	AT1G68520.1	--	B-box type zinc finger protein with CCT domain	LOC_Os03g50310.1	CCT/B-box zinc finger protein, putative, expressed
Sobic.004G211200	CO-like	RIO specific response	ME5	--	--	-1.59441	-1.71943	--	--	--	--	-1.82502	--	Zinc finger protein CONSTANS-LIKE 4 GN=COL4 OS=Arabidopsis thaliana (Mouse-ear cress) PE=2 SV=2	AT5G24930.1	ATCOL4,COL4	CONSTANS-like 4	LOC_Os02g39710.1	CCT/B-box zinc finger protein, putative, expressed
Sobic.006G135100	CO-like	RIO specific response	ME5	--	--	-1.67222	-1.41341	--	--	--	-2.1785	-1.70259	--	Zinc finger protein CONSTANS-LIKE 4 GN=COL4 OS=Arabidopsis thaliana (Mouse-ear cress) PE=2 SV=2	AT5G57660.1	ATCOL5,COL5	CONSTANS-like 5	LOC_Os04g42020.1	CCT/B-box zinc finger protein, putative, expressed
Sobic.002G273300	DBB	RIO specific response	ME5	--	-1.05573	-5.43804	-3.48656	--	--	--	-4.24207	-3.42916	--	Probable salt tolerance-like protein At1g78600 GN=At1g78600 OS=Arabidopsis thaliana (Mouse-ear cress) PE=1 SV=2	AT4G38960.1	--	B-box type zinc finger family protein	LOC_Os09g35880.1	B-box zinc finger family protein, putative, expressed
Sobic.008G147101	G2-like	RIO specific response	ME5	-1.11424	-1.10499	--	-1.31763	--	--	--	--	--	--	Two-component response regulator ARR18 GN=ARR18 OS=Arabidopsis thaliana (Mouse-ear cress) PE=2 SV=2	AT2G03500.1	--	Homeodomain-like superfamily protein	LOC_Os12g39640.1	MYB family transcription factor, putative, expressed
Sobic.002G147400	G2-like	RIO specific response	ME5	--	-1.44014	-1.76943	-1.63132	--	--	--	--	--	--	Transcription factor PCL1 OS=Oryza sativa subsp. japonica (Rice) PE=2 SV=1	AT5G05090.1	--	Homeodomain-like superfamily protein	LOC_Os05g34110.1	homeodomain-related, putative, expressed
Sobic.010G096300	G2-like	RIO specific response	ME5	-1.14437	-1.01247	-3.49721	-3.30415	--	--	--	-2.01844	-2.56072	--	Probable transcription factor GLK1 GN=OSJNBa0031J07.13 OS=Oryza sativa subsp. japonica (Rice) PE=2 SV=1	AT2G20570.1	ATGLK1,GLK1,GPRI1	GBF\'s pro-rich region-interacting factor 1	LOC_Os06g24070.1	myb-like DNA-binding domain containing protein, expressed
Sobic.001G278800	HD-ZIP	RIO specific response	ME5	-1.07475	--	-1.54052	-1.9976	--	--	--	--	-2.24228	--	Homeobox-leucine zipper protein HOX15 OS=Oryza sativa subsp. japonica (Rice) PE=2 SV=1	AT4G37790.1	HAT22	Homeobox-leucine zipper protein family	LOC_Os10g01470.1	homeobox associated leucine zipper, putative, expressed
Sobic.006G163900	HD-ZIP	RIO specific response	ME5	--	-2.49512	-4.49173	-1.62424	--	--	--	-3.83954	-1.57947	--	Homeobox-leucine zipper protein HOX22 OS=Oryza sativa subsp. japonica (Rice) PE=2 SV=2	AT2G46680.1	ATHB-7,ATHB7,HB-7	homeobox 7	LOC_Os04g45810.1	homeobox associated leucine zipper, putative, expressed
Sobic.009G016600	MYB	RIO specific response	ME5	-1.4051	-1.21473	--	-1.82613	--	--	--	--	--	--	Transcription factor MYB48 GN=MYB48 OS=Arabidopsis thaliana (Mouse-ear cress) PE=2 SV=1	AT3G46130.1	ATMYB48,ATMYB48-1,ATMYB48-2,ATMYB48-3,MYB48	myb domain protein 48	LOC_Os05g02420.2	expressed protein
Sobic.009G157500	MYB	RIO specific response	ME5	--	--	-1.59932	-1.63243	--	--	-1.10389	--	-1.2765	--	Transcription factor DIVARICATA GN=DIVARICATA OS=Antirrhinum majus (Garden snapdragon) PE=2 SV=1	AT2G38090.1	--	Duplicated homeodomain-like superfamily protein	LOC_Os05g37730.1	MYB family transcription factor, putative, expressed
Sobic.010G077250	MYB	RIO specific response	ME5	3.29741	3.04049	3.08911	2.85309	--	2.41352	2.57556	--	2.98964	2.09476	Anthocyanin regulatory C1 protein GN=C1 OS=Zea mays (Maize) PE=2 SV=1	AT5G49330.1	ATMYB111,MYB111,PFG3	myb domain protein 111	LOC_Os06g10350.1	MYB family transcription factor, putative, expressed
Sobic.001G295600	MYB_related	RIO specific response	ME5	-1.48103	-1.94866	-2.13446	--	-1.39857	--	-1.37148	-1.8789	--	--	Transcription factor DIVARICATA GN=DIVARICATA OS=Antirrhinum majus (Garden snapdragon) PE=2 SV=1	AT5G61620.1	--	myb-like transcription factor family protein	LOC_Os10g41260.1	MYB family transcription factor, putative, expressed
Sobic.008G164800	NAC	RIO specific response	ME5	-2.02573	-2.5773	-2.38279	-1.44701	--	-1.80652	--	--	--	--	NAC domain-containing protein 21/22 OS=Arabidopsis thaliana (Mouse-ear cress) PE=1 SV=2	AT1G56010.2	anac021,ANAC022,NAC1	NAC domain containing protein 1	LOC_Os12g41680.1	No apical meristem protein, putative, expressed
Sobic.001G009200	NF-YC	RIO specific response	ME5	-1.17315	-1.03546	-2.89081	-3.50586	-1.42743	--	--	-2.23563	-2.09004	--	Pollen-specific leucine-rich repeat extensin-like protein 1 (Precursor) GN=PEX1 OS=Arabidopsis thaliana (Mouse-ear cress) PE=2 SV=1	AT1G07980.1	NF-YC10	nuclear factor Y, subunit C10	LOC_Os03g63530.1	histone-like transcription factor and archaeal histone, putative, expressed
Sobic.003G003600	Nin-like	RIO specific response	ME5	-1.40158	-2.08431	-1.97099	-1.33033	--	--	--	--	--	--	Protein NLP3 OS=Oryza sativa subsp. japonica (Rice) PE=3 SV=1	AT4G24020.1	NLP7	NIN like protein 7	LOC_Os01g13540.1	NIN, putative, expressed
Sobic.004G354700	TCP	RIO specific response	ME5	--	-6.48205	-2.9033	-6.27116	--	--	--	-2.09305	-3.40663	-2.04669	Transcription factor TCP7 GN=TCP7 OS=Arabidopsis thaliana (Mouse-ear cress) PE=2 SV=1	AT5G23280.1	--	TCP family transcription factor	LOC_Os12g07480.1	TCP family transcription factor, putative, expressed
Sobic.010G092100	TCP	RIO specific response	ME5	-1.64959	-1.44831	--	-1.69387	--	--	--	--	--	-1.72363	Transcription factor TCP14 GN=TCP14 OS=Arabidopsis thaliana (Mouse-ear cress) PE=1 SV=1	AT3G47620.1	AtTCP14,TCP14	TEOSINTE BRANCHED, cycloidea and PCF (TCP) 14	LOC_Os02g51280.1	TCP-domain protein, putative, expressed
Sobic.009G244200	ZF-HD	RIO specific response	ME5	-1.27772	-1.15228	-1.62741	--	--	--	--	-1.40287	--	--	ZF-HD homeobox protein At4g24660 GN=At4g24660 OS=Arabidopsis thaliana (Mouse-ear cress) PE=1 SV=1	AT2G02540.1	ATHB21,HB21,ZFHD4	homeobox protein 21	LOC_Os05g50310.1	ZF-HD protein dimerisation region containing protein, expressed
Sobic.009G250000	bHLH	RIO specific response	ME6	--	--	--	-1.412	--	--	--	--	--	--	Transcription factor FAMA GN=MUJ8.4 OS=Arabidopsis thaliana (Mouse-ear cress) PE=1 SV=1	AT3G24140.1	FMA	basic helix-loop-helix (bHLH) DNA-binding superfamily protein	LOC_Os05g50900.1	helix-loop-helix DNA-binding protein, putative, expressed
Sobic.010G218500	bZIP	RIO specific response	ME6	--	-1.07954	--	--	--	--	--	--	--	--	Basic leucine zipper 9 GN=F6A4.10 OS=Arabidopsis thaliana (Mouse-ear cress) PE=1 SV=1	AT5G24800.1	ATBZIP9,BZIP9,BZO2H2	basic leucine zipper 9	LOC_Os06g45140.1	bZIP transcription factor domain containing protein, expressed
Sobic.003G131100	Dof	RIO specific response	ME6	--	--	--	2.00902	--	--	--	--	--	--	Cyclic dof factor 2 GN=MIJ24.16 OS=Arabidopsis thaliana (Mouse-ear cress) PE=1 SV=2	AT5G39660.2	CDF2	cycling DOF factor 2	LOC_Os01g17000.1	expressed protein
Sobic.003G285500	WRKY	RIO specific response	ME6	--	--	--	-2.36767	--	--	--	--	--	--	Probable WRKY transcription factor 65 GN=WRKY65 OS=Arabidopsis thaliana (Mouse-ear cress) PE=2 SV=1	AT3G58710.1	ATWRKY69,WRKY69	WRKY DNA-binding protein 69	LOC_Os01g53040.1	WRKY14, expressed
Sobic.002G231100	ZF-HD	RIO specific response	ME6	--	--	--	2.04736	--	--	--	--	--	--	ZF-HD homeobox protein At4g24660 GN=At4g24660 OS=Arabidopsis thaliana (Mouse-ear cress) PE=1 SV=1	AT4G24660.1	ATHB22,HB22,MEE68	homeobox protein 22	LOC_Os09g29130.1	ZF-HD protein dimerisation region containing protein, expressed
Sobic.009G241600	C3H	RIO specific response	ME7	--	--	-1.84932	--	--	--	--	-1.36941	--	-1.7395	Zinc finger CCCH domain-containing protein 39 OS=Oryza sativa subsp. japonica (Rice) PE=2 SV=1	AT1G66810.1	--	Zinc finger C-x8-C-x5-C-x3-H type family protein	LOC_Os05g50080.1	zinc finger C-x8-C-x5-C-x3-H type family protein, expressed
Sobic.004G256200	CO-like	RIO specific response	ME7	--	--	3.36188	4.12346	1.52622	--	--	2.23915	3.73792	--	Zinc finger protein CONSTANS-LIKE 9 GN=COL9 OS=Arabidopsis thaliana (Mouse-ear cress) PE=2 SV=1	AT5G48250.1	--	B-box type zinc finger protein with CCT domain	LOC_Os02g49230.2	CCT/B-box zinc finger protein, putative, expressed
Sobic.008G042700	E2F/DP	RIO specific response	ME7	--	--	--	-1.57218	--	--	--	--	--	--	Transcription factor E2FA GN=F11F19.8 OS=Arabidopsis thaliana (Mouse-ear cress) PE=1 SV=1	AT2G36010.1	ATE2FA,E2F3	E2F transcription factor 3	LOC_Os12g06200.1	E2F family transcription factor protein, putative, expressed
Sobic.004G312700	GeBP	RIO specific response	ME7	--	--	--	-1.91029	--	--	--	--	-1.14087	--	Mediator-associated protein 1 GN=At4g25210 OS=Arabidopsis thaliana (Mouse-ear cress) PE=1 SV=1	AT4G00390.1	--	DNA-binding storekeeper protein-related transcriptional regulator	LOC_Os02g53150.1	expressed protein
Sobic.004G290800	GRAS	RIO specific response	ME7	--	--	-1.76674	-1.3623	--	--	--	--	-1.19744	--	Scarecrow-like protein 6 GN=SCL6 OS=Arabidopsis thaliana (Mouse-ear cress) PE=1 SV=1	AT4G00150.1	ATHAM3,HAM3	GRAS family transcription factor	LOC_Os02g44370.1	scarecrow, putative, expressed
Sobic.003G034500	MYB	RIO specific response	ME7	--	--	1.67619	1.74546	--	--	--	--	--	--	Transcription factor RAX2 GN=T1J8.7 OS=Arabidopsis thaliana (Mouse-ear cress) PE=1 SV=1	AT2G36890.1	ATMYB38,BIT1,MYB38,RAX2	Duplicated homeodomain-like superfamily protein	LOC_Os01g09590.1	myb-like DNA-binding domain containing protein, putative, expressed
Sobic.004G338800	NAC	RIO specific response	ME7	--	--	--	-2.20864	--	--	--	--	--	--	Protein CUP-SHAPED COTYLEDON 3 OS=Arabidopsis thaliana (Mouse-ear cress) PE=1 SV=1	AT4G28530.1	anac074,NAC074	NAC domain containing protein 74	LOC_Os02g56600.1	no apical meristem protein, putative, expressed
Sobic.008G168300	NF-YA	RIO specific response	ME7	--	--	-1.68394	-1.25387	--	--	--	-1.45575	-1.46875	--	Nuclear transcription factor Y subunit A-7 GN=NFYA7 OS=Arabidopsis thaliana (Mouse-ear cress) PE=2 SV=1	AT1G30500.2	NF-YA7	nuclear factor Y, subunit A7	LOC_Os12g41880.2	nuclear transcription factor Y subunit, putative, expressed
Sobic.006G126600	Trihelix	RIO specific response	ME7	--	--	1.63865	--	--	--	--	--	--	--	Trihelix transcription factor GT-1 GN=GT-1 OS=Arabidopsis thaliana (Mouse-ear cress) PE=1 SV=1	AT1G13450.1	--	Homeodomain-like superfamily protein	LOC_Os04g40930.1	MYB family transcription factor, putative, expressed
Sobic.004G107900	bZIP	RIO specific response	ME8	-1.30837	--	-1.71335	--	-1.47203	--	--	-1.59056	--	-2.85711	Transcription factor RF2b GN=RF2b OS=Oryza sativa subsp. japonica (Rice) PE=1 SV=1	AT3G58120.1	ATBZIP61,BZIP61	Basic-leucine zipper (bZIP) transcription factor family protein	LOC_Os02g14910.1	bZIP transcription factor family protein, putative, expressed
Sobic.003G320300	C2H2	RIO specific response	ME8	--	--	--	--	-1.22726	--	--	--	--	-1.98442	Vegetative cell wall protein gp1 (Precursor) GN=GP1 OS=Chlamydomonas reinhardtii (Chlamydomonas smithii) PE=2 SV=1	AT5G54630.1	--	zinc finger protein-related	LOC_Os01g57650.1	ZOS1-12 - C2H2 zinc finger protein, expressed
Sobic.010G101100	E2F/DP	RIO specific response	ME8	--	--	--	--	-1.74868	1.09371	--	--	--	-2.49547	E2F transcription factor-like E2FE GN=T24C20.40 OS=Arabidopsis thaliana (Mouse-ear cress) PE=2 SV=1	AT3G48160.2	DEL1,E2FE,E2L3	DP-E2F-like 1	LOC_Os06g13670.1	E2F family transcription factor protein, putative, expressed
Sobic.009G154200	MYB_related	RIO specific response	ME8	--	--	3.10415	--	3.98881	--	--	2.46426	--	3.526	Transcription factor DIVARICATA GN=DIVARICATA OS=Antirrhinum majus (Garden snapdragon) PE=2 SV=1	AT5G04760.1	--	Duplicated homeodomain-like superfamily protein	LOC_Os05g37060.1	MYB family transcription factor, putative, expressed
Sobic.004G329800	bHLH	RIO specific response	ME9	--	-1.04324	--	-1.60764	-1.30695	--	--	--	--	--	Transcription factor bHLH66 GN=F27D4.17 OS=Arabidopsis thaliana (Mouse-ear cress) PE=2 SV=1	AT2G24260.1	LRL1	LJRHL1-like 1	LOC_Os02g55250.1	BHLH transcription factor, putative, expressed
Sobic.004G031100	bZIP	RIO specific response	ME9	--	--	--	-1.80967	--	--	--	--	-2.0578	-2.55616	Ocs element-binding factor 1 GN=OBF1 OS=Zea mays (Maize) PE=2 SV=2	AT1G75390.1	AtbZIP44,bZIP44	basic leucine-zipper 44	LOC_Os02g03960.1	CPuORF1 - conserved peptide uORF-containing transcript, expressed
Sobic.004G188300	C2H2	RIO specific response	ME9	--	--	--	-1.28536	--	--	--	--	--	--	Zinc finger protein STOP1 homolog OS=Oryza sativa subsp. japonica (Rice) PE=2 SV=1	AT1G34370.2	STOP1	C2H2 and C2HC zinc fingers superfamily protein	LOC_Os02g36360.1	ZOS2-11 - C2H2 zinc finger protein, expressed
Sobic.002G222300	GeBP	RIO specific response	ME9	--	--	--	-1.32757	--	--	--	--	--	--	Extensin (Precursor) GN=HRGP OS=Zea mays (Maize) PE=2 SV=1	AT1G61730.1	--	DNA-binding storekeeper protein-related transcriptional regulator	LOC_Os09g27850.1	transcription regulator, putative, expressed
Sobic.004G248700	MYB	RIO specific response	ME9	--	--	--	1.53295	--	--	--	--	--	--	Protein ODORANT1 GN=ODO1 OS=Petunia hybrida (Petunia) PE=2 SV=1	AT1G66230.1	AtMYB20,MYB20	myb domain protein 20	LOC_Os02g49986.1	MYB family transcription factor, putative, expressed
Sobic.007G071000	NAC	RIO specific response	ME9	-1.76586	-1.17271	--	-2.86364	-2.03655	-1.21931	-1.04108	--	-1.25777	--	NAC domain-containing protein 21/22 OS=Arabidopsis thaliana (Mouse-ear cress) PE=1 SV=2	AT1G56010.2	anac021,ANAC022,NAC1	NAC domain containing protein 1	LOC_Os08g10080.1	no apical meristem protein, putative, expressed
Sobic.001G389000	WRKY	RIO specific response	ME9	1.59764	--	--	1.66448	1.43219	--	--	--	--	--	WRKY transcription factor 55 GN=WRKY55 OS=Arabidopsis thaliana (Mouse-ear cress) PE=2 SV=1	AT4G11070.1	AtWRKY41,WRKY41	WRKY family transcription factor	LOC_Os03g20550.1	WRKY55, expressed
Sobic.006G190400	B3	RIO specific response	ME10	-1.2804	--	--	--	-1.49057	--	--	--	--	--	B3 domain-containing protein Os02g0683500 GN=OJ1123_G04.23 OS=Oryza sativa subsp. japonica (Rice) PE=2 SV=1	AT2G46870.1	NGA1	AP2/B3-like transcriptional factor family protein	LOC_Os02g45850.1	B3 DNA binding domain containing protein, expressed
Sobic.001G158900	bHLH	RIO specific response	ME10	-1.47959	-1.20879	--	--	-1.26677	--	-1.08387	--	--	--	Transcription factor PIF1 GN=T2G17.2 OS=Arabidopsis thaliana (Mouse-ear cress) PE=1 SV=1	AT2G20180.3	PIF1,PIL5	phytochrome interacting factor 3-like 5	LOC_Os03g43810.1	helix-loop-helix DNA-binding domain containing protein, expressed
Sobic.004G063200	CO-like	RIO specific response	ME10	--	-1.23219	--	--	-1.21922	--	--	--	--	--	Zinc finger protein CONSTANS-LIKE 5 GN=COL5 OS=Arabidopsis thaliana (Mouse-ear cress) PE=2 SV=2	AT5G24930.1	ATCOL4,COL4	CONSTANS-like 4	LOC_Os02g08150.1	CCT/B-box zinc finger protein, putative, expressed
Sobic.010G262200	DBB	RIO specific response	ME10	-1.32522	-1.47674	--	--	--	--	--	--	--	--	Probable salt tolerance-like protein At1g75540 GN=At1g75540 OS=Arabidopsis thaliana (Mouse-ear cress) PE=1 SV=1	AT1G75540.1	STH2	salt tolerance homolog2	LOC_Os06g49880.1	B-box zinc finger family protein, putative, expressed
Sobic.002G165600	ERF	RIO specific response	ME10	3.52187	3.80736	--	--	3.36944	--	--	--	--	2.81438	Ethylene-responsive transcription factor ERF117 GN=ERF117 OS=Arabidopsis thaliana (Mouse-ear cress) PE=2 SV=1	AT1G68550.1	--	Integrase-type DNA-binding superfamily protein	LOC_Os09g13940.1	AP2 domain containing protein, expressed
Sobic.006G210300	ERF	RIO specific response	ME10	1.18714	--	--	--	--	--	--	--	--	--	Ethylene-responsive transcription factor 4 GN=At3g15210 OS=Arabidopsis thaliana (Mouse-ear cress) PE=1 SV=1	AT5G44210.1	ATERF-9,ATERF9,ERF9	erf domain protein 9	LOC_Os04g52090.1	AP2 domain containing protein, expressed
Sobic.001G135400	GATA	RIO specific response	ME10	--	--	--	--	-1.19055	--	--	--	--	--	GATA transcription factor 24 GN=MXL8.2 OS=Arabidopsis thaliana (Mouse-ear cress) PE=2 SV=2	AT3G21175.2	GATA24,TIFY2B,ZML1	ZIM-like 1	LOC_Os03g47970.1	GATA transcription factor 25, putative, expressed
Sobic.008G051400	GATA	RIO specific response	ME10	-1.35467	-2.03598	--	--	-5.88687	--	--	--	--	-2.30143	GATA transcription factor 2 GN=GATA2 OS=Arabidopsis thaliana (Mouse-ear cress) PE=2 SV=1	AT3G45170.1	GATA14	GATA transcription factor 14	LOC_Os12g07120.1	GATA zinc finger domain containing protein, expressed
Sobic.002G220300	HD-ZIP	RIO specific response	ME10	-1.04283	-1.00016	--	--	-1.67306	--	--	--	--	--	Homeobox-leucine zipper protein HOX11 OS=Oryza sativa subsp. japonica (Rice) PE=2 SV=1	AT5G06710.1	HAT14	homeobox from Arabidopsis thaliana	LOC_Os09g27450.1	homeobox associated leucine zipper, putative, expressed
Sobic.003G037400	WRKY	RIO specific response	ME10	-3.18781	-2.76343	--	-3.88356	-2.36655	--	--	--	-3.131	-2.06729	Probable WRKY transcription factor 50 GN=WRKY50 OS=Arabidopsis thaliana (Mouse-ear cress) PE=2 SV=1	AT5G64810.1	ATWRKY51,WRKY51	WRKY DNA-binding protein 51	LOC_Os01g09100.1	WRKY10, expressed
Sobic.008G073200	ZF-HD	RIO specific response	ME10	-1.95406	-1.40104	--	--	-1.50979	--	--	--	-1.45767	-1.74041	ZF-HD homeobox protein At4g24660 GN=At4g24660 OS=Arabidopsis thaliana (Mouse-ear cress) PE=1 SV=1	AT1G14440.2	AtHB31,HB31	homeobox protein 31	LOC_Os11g13930.1	ZF-HD protein dimerisation region containing protein, expressed
Sobic.003G195600	bHLH	RIO specific response	ME11	-2.29651	-2.88989	--	--	-1.36969	--	--	--	--	--	Putative transcription factor bHLH041 GN=MHM17.7 OS=Arabidopsis thaliana (Mouse-ear cress) PE=4 SV=1	AT5G56960.1	--	basic helix-loop-helix (bHLH) DNA-binding family protein	LOC_Os01g39330.1	helix-loop-helix DNA-binding domain containing protein, expressed
Sobic.003G391100	bHLH	RIO specific response	ME11	-1.00689	-2.02343	--	--	--	1.33999	--	--	--	--	Transcription factor bHLH128 GN=T20M3.7 OS=Arabidopsis thaliana (Mouse-ear cress) PE=1 SV=1	AT1G05805.1	--	basic helix-loop-helix (bHLH) DNA-binding superfamily protein	LOC_Os01g67480.1	helix-loop-helix DNA-binding domain containing protein, expressed
Sobic.002G293000	C2H2	RIO specific response	ME11	--	--	--	--	-1.13568	--	--	--	--	--	Zinc finger protein MAGPIE GN=MGP OS=Arabidopsis thaliana (Mouse-ear cress) PE=1 SV=1	AT1G55110.1	AtIDD7,IDD7	indeterminate(ID)-domain 7	LOC_Os09g38340.1	ZOS9-17 - C2H2 zinc finger protein, expressed
Sobic.001G481300	ERF	RIO specific response	ME11	--	-1.4285	--	-2.30255	-1.14342	1.16385	--	--	-1.88883	-2.03172	Ethylene-responsive transcription factor 1 GN=OJ1311_D08.9 OS=Oryza sativa subsp. japonica (Rice) PE=1 SV=1	AT1G72360.2	HRE1	Integrase-type DNA-binding superfamily protein	LOC_Os03g08500.1	AP2 domain containing protein, expressed
Sobic.006G240500	ERF	RIO specific response	ME11	-1.02194	-1.11146	--	--	--	--	--	--	--	--	Ethylene-responsive transcription factor RAP2-10 OS=Arabidopsis thaliana (Mouse-ear cress) PE=2 SV=1	AT2G23340.1	DEAR3	DREB and EAR motif protein 3	LOC_Os04g55520.1	AP2 domain containing protein, expressed
Sobic.001G297200	HD-ZIP	RIO specific response	ME11	-1.37582	--	--	--	--	--	--	--	--	--	Homeobox-leucine zipper protein HOX1 OS=Oryza sativa subsp. japonica (Rice) PE=1 SV=1	AT3G60390.1	HAT3	homeobox-leucine zipper protein 3	LOC_Os10g41230.1	homeobox associated leucine zipper, putative, expressed
Sobic.001G328500	LBD	RIO specific response	ME11	-2.80147	-2.66197	--	-1.77811	--	--	--	--	--	--	LOB domain-containing protein 37 GN=K8K14.16 OS=Arabidopsis thaliana (Mouse-ear cress) PE=2 SV=1	AT5G67420.1	ASL39,LBD37	LOB domain-containing protein 37	LOC_Os03g33090.1	DUF260 domain containing protein, putative, expressed
Sobic.010G273700	NAC	RIO specific response	ME11	-1.08917	-1.05905	--	--	-1.32105	--	--	--	--	--	NAC transcription factor ONAC010 GN=ONAC010 OS=Oryza sativa subsp. indica (Rice) PE=2 SV=1	AT2G17040.1	anac036,NAC036	NAC domain containing protein 36	LOC_Os06g51070.1	no apical meristem protein, putative, expressed
Sobic.009G221400	RAV	RIO specific response	ME11	-1.63559	-1.33332	--	--	--	--	--	--	--	--	AP2/ERF and B3 domain-containing protein Os05g0549800 OS=Oryza sativa subsp. japonica (Rice) PE=2 SV=1	AT1G13260.1	EDF4,RAV1	related to ABI3/VP1 1	LOC_Os05g47650.1	B3 DNA binding domain containing protein, expressed
Sobic.003G305000	TCP	RIO specific response	ME11	-1.20746	-1.4715	--	-1.41524	--	--	--	--	--	--	Transcription factor TCP5 GN=TCP5 OS=Arabidopsis thaliana (Mouse-ear cress) PE=2 SV=1	AT5G60970.1	TCP5	TEOSINTE BRANCHED 1, cycloidea and PCF transcription factor 5	LOC_Os01g55750.1	TCP family transcription factor, putative, expressed
Sobic.003G242800	WRKY	RIO specific response	ME11	-3.53729	-3.44447	--	--	-3.23673	--	--	--	--	--	Probable WRKY transcription factor 53 GN=WRKY53 OS=Arabidopsis thaliana (Mouse-ear cress) PE=1 SV=1	AT4G11070.1	AtWRKY41,WRKY41	WRKY family transcription factor	LOC_Os01g46800.1	WRKY15, expressed
Sobic.003G293100	GATA	RIO specific response	ME12	--	--	--	--	-1.50957	1.90791	1.76686	--	--	-2.20456	GATA transcription factor 12 GN=GATA12 OS=Arabidopsis thaliana (Mouse-ear cress) PE=2 SV=1	AT5G25830.1	GATA12	GATA transcription factor 12	LOC_Os01g54210.1	GATA zinc finger domain containing protein, expressed
Sobic.006G089500	ARF	RIO specific response	ME13	--	-1.00424	--	--	--	--	--	--	--	--	Auxin response factor 9 GN=OSJNBa0064D20.11 OS=Oryza sativa subsp. japonica (Rice) PE=2 SV=1	AT1G59750.2	ARF1	auxin response factor 1	LOC_Os04g36054.1	auxin response factor 9, putative, expressed
Sobic.001G351700	CAMTA	RIO specific response	ME13	--	-1.0243	--	--	--	--	--	--	--	--	Calmodulin-binding transcription activator 3 GN=T26C19.4 OS=Arabidopsis thaliana (Mouse-ear cress) PE=1 SV=1	AT5G09410.1	CAMTA1,EICBP.B	ethylene induced calmodulin binding protein	LOC_Os07g43030.1	calmodulin-binding transcription activator, putative, expressed
Sobic.003G012800	ERF	RIO specific response	ME13	--	1.31117	--	--	--	--	--	--	--	--	Ethylene-responsive transcription factor CRF2 GN=F9D16.220 OS=Arabidopsis thaliana (Mouse-ear cress) PE=1 SV=1	AT4G27950.1	CRF4	cytokinin response factor 4	LOC_Os01g12440.1	AP2 domain containing protein, expressed
Sobic.010G227300	NAC	RIO specific response	ME13	-1.54711	-1.47236	--	--	--	-1.52319	--	--	--	--	NAC domain-containing protein 21/22 OS=Arabidopsis thaliana (Mouse-ear cress) PE=1 SV=2	AT1G56010.2	anac021,ANAC022,NAC1	NAC domain containing protein 1	LOC_Os06g46270.1	no apical meristem protein, putative, expressed
Sobic.002G421900	Dof	RIO specific response	ME14	--	--	--	-1.99329	--	--	--	--	-2.4505	--	Cyclic dof factor 2 GN=MIJ24.16 OS=Arabidopsis thaliana (Mouse-ear cress) PE=1 SV=2	AT3G47500.1	CDF3	cycling DOF factor 3	LOC_Os07g48570.1	expressed protein
Sobic.003G299700	TCP	RIO specific response	ME14	--	--	--	-2.07608	--	--	--	--	--	--	Transcription factor PCF7 OS=Oryza sativa subsp. japonica (Rice) PE=2 SV=2	AT3G15030.1	MEE35,TCP4	TCP family transcription factor 4	LOC_Os01g55100.1	slTCP3, putative, expressed
Sobic.004G237300	TCP	RIO specific response	ME14	--	-1.618	--	-3.80899	--	--	--	--	-5.03024	-4.7587	Transcription factor PCF3 GN=PCF3 OS=Oryza sativa subsp. japonica (Rice) PE=2 SV=1	AT1G58100.1	--	TCP family transcription factor	LOC_Os12g07480.1	TCP family transcription factor, putative, expressed
Sobic.009G124200	AP2	RIO specific response	ME15	--	--	--	--	-2.10572	--	--	--	--	-2.27594	AP2-like ethylene-responsive transcription factor At2g41710 GN=At2g41710 OS=Arabidopsis thaliana (Mouse-ear cress) PE=2 SV=2	AT2G41710.1	--	Integrase-type DNA-binding superfamily protein	LOC_Os05g32270.1	AP2 domain containing protein, expressed
Sobic.001G062700	GATA	RIO specific response	ME15	--	--	--	--	-3.12718	--	--	-1.45501	-1.82068	-4.38988	GATA transcription factor 2 GN=GATA2 OS=Arabidopsis thaliana (Mouse-ear cress) PE=2 SV=1	AT3G60530.1	GATA4	GATA transcription factor 4	LOC_Os10g40810.1	GATA zinc finger domain containing protein, expressed
Sobic.004G094100	GATA	RIO specific response	ME15	--	--	--	--	-1.26216	--	--	--	--	--	GATA transcription factor 21 GN=MPI10.2 OS=Arabidopsis thaliana (Mouse-ear cress) PE=1 SV=2	AT5G56860.1	GATA21,GNC	GATA type zinc finger transcription factor family protein	LOC_Os02g12790.1	GATA zinc finger domain containing protein, expressed
Sobic.001G104500	GRF	RIO specific response	ME15	--	--	--	--	-2.21965	--	--	--	--	-4.85863	Growth-regulating factor 6 OS=Oryza sativa subsp. japonica (Rice) PE=2 SV=2	AT2G22840.1	AtGRF1,GRF1	growth-regulating factor 1	LOC_Os03g51970.1	growth-regulating factor, putative, expressed
Sobic.006G182300	Dof	RIO specific response	ME16	--	-5.04551	--	--	--	--	--	--	--	--	Dof zinc finger protein DOF4.6 GN=DOF4.6 OS=Arabidopsis thaliana (Mouse-ear cress) PE=2 SV=2	AT4G24060.1	--	Dof-type zinc finger DNA-binding family protein	LOC_Os04g47990.2	dof zinc finger domain containing protein, putative, expressed
Sobic.001G456000	YABBY	RIO specific response	ME16	--	1.44448	--	--	--	--	--	--	--	-1.83416	Protein DROOPING LEAF GN=OsJ_009541 OS=Oryza sativa subsp. japonica (Rice) PE=1 SV=1	AT1G69180.1	CRC	Plant-specific transcription factor YABBY family protein	LOC_Os03g11600.2	YABBY domain containing protein, putative, expressed
Sobic.009G178000	G2-like	RIO specific response	ME17	--	1.13617	--	--	--	-1.08713	--	--	--	--	Myb family transcription factor APL GN=APL OS=Arabidopsis thaliana (Mouse-ear cress) PE=2 SV=2	AT5G18240.1	ATMYR1,MYR1	myb-related protein 1	LOC_Os05g40960.1	Myb transcription factor, putative, expressed
Sobic.002G389600	GeBP	RIO specific response	ME17	--	-2.84413	--	--	--	--	--	--	--	--	Vegetative cell wall protein gp1 (Precursor) GN=GP1 OS=Chlamydomonas reinhardtii (Chlamydomonas smithii) PE=2 SV=1	AT3G04930.1	--	DNA-binding storekeeper protein-related transcriptional regulator	LOC_Os03g25430.1	transcription regulator, putative, expressed
Sobic.004G163200	HSF	RIO specific response	ME17	2.08632	3.23723	3.56923	--	1.53371	1.96625	2.6469	3.61235	--	2.16098	Heat stress transcription factor A-3 OS=Oryza sativa subsp. japonica (Rice) PE=2 SV=1	AT5G03720.1	AT-HSFA3,HSFA3	heat shock transcription factor A3	LOC_Os02g32590.1	HSF-type DNA-binding domain containing protein, expressed
Sobic.001G397900	MYB	RIO specific response	ME17	--	2.46017	2.19673	--	--	--	--	--	1.24705	--	Myb-related protein P GN=P OS=Zea mays (Maize) PE=2 SV=1	AT2G47460.1	ATMYB12,MYB12,PFG1	myb domain protein 12	LOC_Os03g19120.1	MYB family transcription factor, putative, expressed
Sobic.009G235500	MYB_related	RIO specific response	ME17	1.42324	2.07504	2.06971	-1.21501	--	1.0123	--	--	--	--	Protein RADIALIS-like 1 GN=T22F8.150 OS=Arabidopsis thaliana (Mouse-ear cress) PE=2 SV=1	AT4G39250.1	ATRL1,RL1,RSM2	RAD-like 1	LOC_Os05g49240.1	homeodomain-related, putative, expressed
Sobic.001G140200	TALE	RIO specific response	ME17	1.03915	1.45698	--	--	--	--	--	--	--	--	Homeobox protein knotted-1-like 4 OS=Oryza sativa subsp. japonica (Rice) PE=2 SV=1	AT4G08150.1	BP,BP1,KNAT1	KNOTTED-like from Arabidopsis thaliana	LOC_Os07g03770.1	Homeobox domain containing protein, expressed
Sobic.002G174200	WRKY	RIO specific response	ME17	1.19735	1.47835	1.76642	--	--	1.75088	1.23848	1.63874	--	--	Probable WRKY transcription factor 53 GN=WRKY53 OS=Arabidopsis thaliana (Mouse-ear cress) PE=1 SV=1	AT2G46400.1	ATWRKY46,WRKY46	WRKY DNA-binding protein 46	LOC_Os09g16510.1	WRKY74, expressed
Sobic.008G157100	bZIP	RIO specific response	ME18	-2.31867	-2.35988	-1.61467	-6.27763	--	--	--	--	-4.11034	--	Light-inducible protein CPRF2 GN=CPRF2 OS=Petroselinum crispum (Parsley) PE=2 SV=2	AT5G28770.2	AtbZIP63,BZO2H3	bZIP transcription factor family protein	LOC_Os12g40920.1	bZIP transcription factor domain containing protein, expressed
Sobic.001G381300	WRKY	RIO specific response	ME18	--	-1.39624	--	--	--	--	--	1.72368	--	2.92761	Probable WRKY transcription factor 70 GN=WRKY70 OS=Arabidopsis thaliana (Mouse-ear cress) PE=2 SV=1	AT3G56400.1	ATWRKY70,WRKY70	WRKY DNA-binding protein 70	LOC_Os03g21710.1	WRKY79, expressed
Sobic.008G060300	WRKY	RIO specific response	ME18	-1.08734	--	--	-1.39759	--	--	-1.41176	--	--	--	Probable WRKY transcription factor 70 GN=WRKY70 OS=Arabidopsis thaliana (Mouse-ear cress) PE=2 SV=1	AT3G56400.1	ATWRKY70,WRKY70	WRKY DNA-binding protein 70	LOC_Os05g25770.1	WRKY45, expressed
Sobic.001G476500	bHLH	RIO specific response	ME19	2.30079	--	--	1.9485	--	--	--	--	--	-3.03978	Transcription factor bHLH96 GN=T9N14.4 OS=Arabidopsis thaliana (Mouse-ear cress) PE=2 SV=1	AT1G72210.1	--	basic helix-loop-helix (bHLH) DNA-binding superfamily protein	LOC_Os03g08930.1	helix-loop-helix DNA-binding protein, putative, expressed
Sobic.004G070900	MYB	RIO specific response	ME19	1.29124	--	--	1.27734	1.47268	1.2073	--	--	--	--	Transcription factor MYB44 GN=K8K14.2 OS=Arabidopsis thaliana (Mouse-ear cress) PE=2 SV=1	AT5G67300.1	ATMYB44,ATMYBR1,MYB44,MYBR1	myb domain protein r1	LOC_Os02g09480.1	myb-like DNA-binding domain containing protein, putative, expressed
Sobic.010G201388	MYB	RIO specific response	ME19	1.26131	--	--	--	--	1.43659	--	--	--	--	Transcription factor MYB44 GN=K8K14.2 OS=Arabidopsis thaliana (Mouse-ear cress) PE=2 SV=1	AT4G37260.1	ATMYB73,MYB73	myb domain protein 73	LOC_Os06g43090.1	MYB transcription factor TaMYB1, putative, expressed
Sobic.009G238500	ERF	RIO specific response	ME21	1.16121	--	--	--	--	--	--	--	--	--	Ethylene-responsive transcription factor ERF061 GN=ERF061 OS=Arabidopsis thaliana (Mouse-ear cress) PE=2 SV=1	AT1G64380.1	--	Integrase-type DNA-binding superfamily protein	LOC_Os05g49700.1	AP2 domain containing protein, expressed
Sobic.003G272200	bHLH	RIO specific response	ME22	1.36869	--	--	--	--	2.52454	--	--	--	--	Transcription factor ABA-INDUCIBLE bHLH-TYPE GN=F13A10.4 OS=Arabidopsis thaliana (Mouse-ear cress) PE=2 SV=2	AT2G46510.1	AIB,ATAIB	ABA-inducible BHLH-type transcription factor	LOC_Os01g50940.1	helix-loop-helix DNA-binding domain containing protein, expressed
Sobic.009G124200	AP2	SN005 specific response	ME1	--	--	--	--	-2.10572	--	--	--	--	-2.27594	AP2-like ethylene-responsive transcription factor At2g41710 GN=At2g41710 OS=Arabidopsis thaliana (Mouse-ear cress) PE=2 SV=2	AT2G41710.1	--	Integrase-type DNA-binding superfamily protein	LOC_Os05g32270.1	AP2 domain containing protein, expressed
Sobic.008G041100	B3	SN005 specific response	ME1	--	--	--	--	--	--	--	-2.83731	--	-2.42078	B3 domain-containing protein Os11g0156000 OS=Oryza sativa subsp. japonica (Rice) PE=2 SV=1	AT3G11580.1	--	AP2/B3-like transcriptional factor family protein	LOC_Os12g06080.1	expressed protein
Sobic.001G476500	bHLH	SN005 specific response	ME1	2.30079	--	--	1.9485	--	--	--	--	--	-3.03978	Transcription factor bHLH96 GN=T9N14.4 OS=Arabidopsis thaliana (Mouse-ear cress) PE=2 SV=1	AT1G72210.1	--	basic helix-loop-helix (bHLH) DNA-binding superfamily protein	LOC_Os03g08930.1	helix-loop-helix DNA-binding protein, putative, expressed
Sobic.002G260600	bHLH	SN005 specific response	ME1	--	--	--	--	--	--	1.04244	--	--	-2.67093	Transcription factor bHLH137 GN=K3K7 OS=Arabidopsis thaliana (Mouse-ear cress) PE=2 SV=1	AT5G50915.2	--	basic helix-loop-helix (bHLH) DNA-binding superfamily protein	LOC_Os09g33580.1	BEE 1, putative, expressed
Sobic.003G272200	bHLH	SN005 specific response	ME1	1.36869	--	--	--	--	2.52454	--	--	--	--	Transcription factor ABA-INDUCIBLE bHLH-TYPE GN=F13A10.4 OS=Arabidopsis thaliana (Mouse-ear cress) PE=2 SV=2	AT2G46510.1	AIB,ATAIB	ABA-inducible BHLH-type transcription factor	LOC_Os01g50940.1	helix-loop-helix DNA-binding domain containing protein, expressed
Sobic.003G391100	bHLH	SN005 specific response	ME1	-1.00689	-2.02343	--	--	--	1.33999	--	--	--	--	Transcription factor bHLH128 GN=T20M3.7 OS=Arabidopsis thaliana (Mouse-ear cress) PE=1 SV=1	AT1G05805.1	--	basic helix-loop-helix (bHLH) DNA-binding superfamily protein	LOC_Os01g67480.1	helix-loop-helix DNA-binding domain containing protein, expressed
Sobic.004G207200	bHLH	SN005 specific response	ME1	--	--	-1.55459	-1.78694	--	--	--	--	-1.14915	--	Transcription factor bHLH128 GN=T20M3.7 OS=Arabidopsis thaliana (Mouse-ear cress) PE=1 SV=1	AT1G05805.1	--	basic helix-loop-helix (bHLH) DNA-binding superfamily protein	LOC_Os02g39140.1	helix-loop-helix DNA-binding domain containing protein, expressed
Sobic.005G131900	bHLH	SN005 specific response	ME1	--	--	--	--	-1.27873	--	--	--	--	-2.44651	Transcription factor ICE1 OS=Arabidopsis thaliana (Mouse-ear cress) PE=1 SV=1	AT3G26744.1	ATICE1,ICE1,SCRM	basic helix-loop-helix (bHLH) DNA-binding superfamily protein	LOC_Os11g32100.1	inducer of CBF expression 1, putative, expressed
Sobic.010G091700	bHLH	SN005 specific response	ME1	--	--	--	--	--	2.91424	2.01091	--	--	--	Transcription factor bHLH135 GN=At1g74500 OS=Arabidopsis thaliana (Mouse-ear cress) PE=1 SV=1	AT1G26945.1	KDR	basic helix-loop-helix (bHLH) DNA-binding superfamily protein	LOC_Os02g51320.1	helix-loop-helix DNA-binding domain containing protein, expressed
Sobic.010G269700	bHLH	SN005 specific response	ME1	--	--	--	--	--	--	--	--	--	-2.80499	Transcription factor bHLH93 GN=K21L13.16 OS=Arabidopsis thaliana (Mouse-ear cress) PE=1 SV=1	AT5G65640.1	bHLH093	beta HLH protein 93	LOC_Os03g04310.2	BHLH transcription factor, putative, expressed
Sobic.003G021800	bZIP	SN005 specific response	ME1	--	--	--	--	-1.27938	--	--	--	--	-2.66677	Transcription factor RF2a OS=Oryza sativa subsp. japonica (Rice) PE=1 SV=1	AT3G58120.1	ATBZIP61,BZIP61	Basic-leucine zipper (bZIP) transcription factor family protein	LOC_Os01g11350.1	bZIP transcription factor domain containing protein, expressed
Sobic.003G300100	bZIP	SN005 specific response	ME1	--	--	--	--	-1.57865	--	--	--	--	-2.06576	Transcription factor RF2b GN=RF2b OS=Oryza sativa subsp. japonica (Rice) PE=1 SV=1	AT2G42380.2	ATBZIP34,BZIP34	Basic-leucine zipper (bZIP) transcription factor family protein	LOC_Os01g55150.1	bZIP transcription factor domain containing protein, expressed
Sobic.004G026700	bZIP	SN005 specific response	ME1	--	--	-1.60549	-2.13218	--	--	--	-1.33673	-1.72484	--	Transcription factor HBP-1a OS=Triticum aestivum (Wheat) PE=2 SV=1	AT1G32150.1	AtbZIP68,bZIP68	basic region/leucine zipper transcription factor 68	LOC_Os02g03580.1	transcription factor, putative, expressed
Sobic.004G031100	bZIP	SN005 specific response	ME1	--	--	--	-1.80967	--	--	--	--	-2.0578	-2.55616	Ocs element-binding factor 1 GN=OBF1 OS=Zea mays (Maize) PE=2 SV=2	AT1G75390.1	AtbZIP44,bZIP44	basic leucine-zipper 44	LOC_Os02g03960.1	CPuORF1 - conserved peptide uORF-containing transcript, expressed
Sobic.004G107900	bZIP	SN005 specific response	ME1	-1.30837	--	-1.71335	--	-1.47203	--	--	-1.59056	--	-2.85711	Transcription factor RF2b GN=RF2b OS=Oryza sativa subsp. japonica (Rice) PE=1 SV=1	AT3G58120.1	ATBZIP61,BZIP61	Basic-leucine zipper (bZIP) transcription factor family protein	LOC_Os02g14910.1	bZIP transcription factor family protein, putative, expressed
Sobic.004G168800	bZIP	SN005 specific response	ME1	--	--	--	--	--	--	--	--	--	-2.87106	Transcription factor VIP1 GN=F2J6.6 OS=Arabidopsis thaliana (Mouse-ear cress) PE=1 SV=1	AT5G04840.1	--	bZIP protein	LOC_Os02g33560.1	expressed protein
Sobic.007G224400	bZIP	SN005 specific response	ME1	--	--	-1.8212	-2.55942	--	--	--	--	-2.17654	-1.85123	Basic leucine zipper 63 GN=T32B20.4 OS=Arabidopsis thaliana (Mouse-ear cress) PE=1 SV=1	AT1G13600.1	AtbZIP58,bZIP58	basic leucine-zipper 58	LOC_Os08g38020.1	bZIP transcription factor domain containing protein, expressed
Sobic.009G030100	bZIP	SN005 specific response	ME1	--	--	--	--	--	--	--	--	-1.29474	-1.51152	Ocs element-binding factor 1 GN=OBF1 OS=Zea mays (Maize) PE=2 SV=2	AT3G62420.1	ATBZIP53,BZIP53	basic region/leucine zipper motif 53	LOC_Os05g03865.1	expressed protein
Sobic.010G267500	bZIP	SN005 specific response	ME1	--	--	--	--	--	--	--	--	-1.33569	--	Arginine/serine-rich protein 45 GN=F19K19.9 OS=Arabidopsis thaliana (Mouse-ear cress) PE=1 SV=1	AT4G35040.1	bZIP19	Basic-leucine zipper (bZIP) transcription factor family protein	LOC_Os06g50310.1	E2F-related protein, putative, expressed
Sobic.002G221400	C2H2	SN005 specific response	ME1	--	--	--	--	--	--	--	--	--	-2.39159	Zinc finger protein MAGPIE GN=MGP OS=Arabidopsis thaliana (Mouse-ear cress) PE=1 SV=1	AT1G25250.1	AtIDD16,IDD16	indeterminate(ID)-domain 16	LOC_Os09g27650.2	ZOS9-14 - C2H2 zinc finger protein, expressed
Sobic.010G052500	C2H2	SN005 specific response	ME1	--	--	--	--	--	-1.38266	--	1.73708	--	--	Vegetative cell wall protein gp1 (Precursor) GN=GP1 OS=Chlamydomonas reinhardtii (Chlamydomonas smithii) PE=2 SV=1	AT5G52010.1	--	C2H2-like zinc finger protein	LOC_Os06g07020.1	ZOS6-01 - C2H2 zinc finger protein, expressed
Sobic.010G190400	C2H2	SN005 specific response	ME1	1.47716	--	--	--	--	--	--	--	--	-2.1124	Protein TRANSPARENT TESTA 1 GN=TT1 OS=Arabidopsis thaliana (Mouse-ear cress) PE=2 SV=1	AT3G57670.1	NTT,WIP2	C2H2-type zinc finger family protein	LOC_Os06g40960.1	ZOS6-05 - C2H2 zinc finger protein, expressed
Sobic.002G343300	C3H	SN005 specific response	ME1	--	--	--	-4.01663	--	--	--	-1.98103	--	--	Zinc finger CCCH domain-containing protein 50 OS=Oryza sativa subsp. japonica (Rice) PE=2 SV=1	AT2G41900.1	--	CCCH-type zinc finger protein with ARM repeat domain	LOC_Os07g38090.1	zinc finger family protein, putative, expressed
Sobic.009G241600	C3H	SN005 specific response	ME1	--	--	-1.84932	--	--	--	--	-1.36941	--	-1.7395	Zinc finger CCCH domain-containing protein 39 OS=Oryza sativa subsp. japonica (Rice) PE=2 SV=1	AT1G66810.1	--	Zinc finger C-x8-C-x5-C-x3-H type family protein	LOC_Os05g50080.1	zinc finger C-x8-C-x5-C-x3-H type family protein, expressed
Sobic.001G118100	CO-like	SN005 specific response	ME1	-1.0125	-1.42382	-2.24631	-2.9542	-1.40272	--	--	-2.59425	-3.27873	--	Zinc finger protein CONSTANS-LIKE 16 GN=COL16 OS=Arabidopsis thaliana (Mouse-ear cress) PE=2 SV=2	AT1G68520.1	--	B-box type zinc finger protein with CCT domain	LOC_Os03g50310.1	CCT/B-box zinc finger protein, putative, expressed
Sobic.004G211200	CO-like	SN005 specific response	ME1	--	--	-1.59441	-1.71943	--	--	--	--	-1.82502	--	Zinc finger protein CONSTANS-LIKE 4 GN=COL4 OS=Arabidopsis thaliana (Mouse-ear cress) PE=2 SV=2	AT5G24930.1	ATCOL4,COL4	CONSTANS-like 4	LOC_Os02g39710.1	CCT/B-box zinc finger protein, putative, expressed
Sobic.004G249500	CO-like	SN005 specific response	ME1	-1.17024	--	2.66156	--	1.18103	--	--	2.2497	--	--	Zinc finger protein CONSTANS-LIKE 16 GN=COL16 OS=Arabidopsis thaliana (Mouse-ear cress) PE=2 SV=2	AT1G68520.1	--	B-box type zinc finger protein with CCT domain	LOC_Os02g49880.1	CCT/B-box zinc finger protein, putative, expressed
Sobic.010G101100	E2F/DP	SN005 specific response	ME1	--	--	--	--	-1.74868	1.09371	--	--	--	-2.49547	E2F transcription factor-like E2FE GN=T24C20.40 OS=Arabidopsis thaliana (Mouse-ear cress) PE=2 SV=1	AT3G48160.2	DEL1,E2FE,E2L3	DP-E2F-like 1	LOC_Os06g13670.1	E2F family transcription factor protein, putative, expressed
Sobic.001G481300	ERF	SN005 specific response	ME1	--	-1.4285	--	-2.30255	-1.14342	1.16385	--	--	-1.88883	-2.03172	Ethylene-responsive transcription factor 1 GN=OJ1311_D08.9 OS=Oryza sativa subsp. japonica (Rice) PE=1 SV=1	AT1G72360.2	HRE1	Integrase-type DNA-binding superfamily protein	LOC_Os03g08500.1	AP2 domain containing protein, expressed
Sobic.002G184400	ERF	SN005 specific response	ME1	--	--	--	--	--	--	--	--	--	-1.65111	Ethylene-responsive transcription factor RAP2-4 OS=Arabidopsis thaliana (Mouse-ear cress) PE=1 SV=1	AT1G78080.1	RAP2.4	related to AP2 4	LOC_Os09g20350.1	ethylene-responsive transcription factor, putative, expressed
Sobic.002G269300	ERF	SN005 specific response	ME1	--	--	1.6368	-2.23526	--	1.4762	--	--	-3.02836	--	Dehydration-responsive element-binding protein 1A GN=DREB1A OS=Oryza sativa subsp. indica (Rice) PE=2 SV=1	AT4G25480.1	ATCBF3,CBF3,DREB1A	dehydration response element B1A	LOC_Os09g35030.1	dehydration-responsive element-binding protein, putative, expressed
Sobic.004G084600	ERF	SN005 specific response	ME1	--	--	--	--	--	--	--	-1.50997	--	-1.69172	Ethylene-responsive transcription factor WIN1 GN=F9L1.31 OS=Arabidopsis thaliana (Mouse-ear cress) PE=2 SV=1	AT1G15360.1	SHN1,WIN1	Integrase-type DNA-binding superfamily protein	LOC_Os02g10760.1	AP2 domain containing protein, expressed
Sobic.006G167800	ERF	SN005 specific response	ME1	--	-1.21686	--	-1.48884	--	1.24995	--	--	-1.6549	-1.75675	Ethylene-responsive transcription factor 2 GN=ERF2 OS=Nicotiana tabacum (Common tobacco) PE=2 SV=1	AT4G17500.1	ATERF-1,ERF-1	ethylene responsive element binding factor 1	LOC_Os04g46220.1	ethylene-responsive transcription factor, putative, expressed
Sobic.010G185300	ERF	SN005 specific response	ME1	--	--	--	--	--	--	--	-2.36959	--	-2.51643	Ethylene-responsive transcription factor WIN1 GN=F9L1.31 OS=Arabidopsis thaliana (Mouse-ear cress) PE=2 SV=1	AT1G15360.1	SHN1,WIN1	Integrase-type DNA-binding superfamily protein	LOC_Os02g10760.1	AP2 domain containing protein, expressed
Sobic.007G054400	FAR1	SN005 specific response	ME1	--	--	--	--	--	--	1.2677	1.80517	--	--	Protein FAR1-RELATED SEQUENCE 5 GN=FRS5 OS=Arabidopsis thaliana (Mouse-ear cress) PE=2 SV=1	AT3G06250.1	FRS7	FAR1-related sequence 7	LOC_Os03g15040.1	FAR1 family protein, expressed
Sobic.009G178000	G2-like	SN005 specific response	ME1	--	1.13617	--	--	--	-1.08713	--	--	--	--	Myb family transcription factor APL GN=APL OS=Arabidopsis thaliana (Mouse-ear cress) PE=2 SV=2	AT5G18240.1	ATMYR1,MYR1	myb-related protein 1	LOC_Os05g40960.1	Myb transcription factor, putative, expressed
Sobic.001G062700	GATA	SN005 specific response	ME1	--	--	--	--	-3.12718	--	--	-1.45501	-1.82068	-4.38988	GATA transcription factor 2 GN=GATA2 OS=Arabidopsis thaliana (Mouse-ear cress) PE=2 SV=1	AT3G60530.1	GATA4	GATA transcription factor 4	LOC_Os10g40810.1	GATA zinc finger domain containing protein, expressed
Sobic.003G293100	GATA	SN005 specific response	ME1	--	--	--	--	-1.50957	1.90791	1.76686	--	--	-2.20456	GATA transcription factor 12 GN=GATA12 OS=Arabidopsis thaliana (Mouse-ear cress) PE=2 SV=1	AT5G25830.1	GATA12	GATA transcription factor 12	LOC_Os01g54210.1	GATA zinc finger domain containing protein, expressed
Sobic.008G051400	GATA	SN005 specific response	ME1	-1.35467	-2.03598	--	--	-5.88687	--	--	--	--	-2.30143	GATA transcription factor 2 GN=GATA2 OS=Arabidopsis thaliana (Mouse-ear cress) PE=2 SV=1	AT3G45170.1	GATA14	GATA transcription factor 14	LOC_Os12g07120.1	GATA zinc finger domain containing protein, expressed
Sobic.001G033200	GRAS	SN005 specific response	ME1	--	--	--	--	--	--	--	--	1.37169	--	Scarecrow-like protein 14 GN=SCL14 OS=Arabidopsis thaliana (Mouse-ear cress) PE=2 SV=2	AT1G07530.1	ATGRAS2,GRAS2,SCL14	SCARECROW-like 14	LOC_Os04g50060.1	GRAS family transcription factor domain containing protein, expressed
Sobic.004G290800	GRAS	SN005 specific response	ME1	--	--	-1.76674	-1.3623	--	--	--	--	-1.19744	--	Scarecrow-like protein 6 GN=SCL6 OS=Arabidopsis thaliana (Mouse-ear cress) PE=1 SV=1	AT4G00150.1	ATHAM3,HAM3	GRAS family transcription factor	LOC_Os02g44370.1	scarecrow, putative, expressed
Sobic.005G017500	GRAS	SN005 specific response	ME1	--	--	--	--	--	--	--	--	--	-1.99577	Protein SCARECROW GN=SCR OS=Zea mays (Maize) PE=2 SV=1	AT3G54220.1	SCR,SGR1	GRAS family transcription factor	LOC_Os12g02870.1	GRAS family transcription factor domain containing protein, expressed
Sobic.001G104500	GRF	SN005 specific response	ME1	--	--	--	--	-2.21965	--	--	--	--	-4.85863	Growth-regulating factor 6 OS=Oryza sativa subsp. japonica (Rice) PE=2 SV=2	AT2G22840.1	AtGRF1,GRF1	growth-regulating factor 1	LOC_Os03g51970.1	growth-regulating factor, putative, expressed
Sobic.006G203400	GRF	SN005 specific response	ME1	--	--	--	--	--	--	--	--	--	-2.5081	Growth-regulating factor 3 OS=Oryza sativa subsp. japonica (Rice) PE=3 SV=2	AT3G13960.1	AtGRF5,GRF5	growth-regulating factor 5	LOC_Os04g51190.1	growth-regulating factor, putative, expressed
Sobic.010G013500	GRF	SN005 specific response	ME1	--	--	--	--	--	--	--	--	-1.87456	-2.52861	Growth-regulating factor 5 GN=OSJNBa0019F11.24 OS=Oryza sativa subsp. japonica (Rice) PE=2 SV=1	AT3G13960.1	AtGRF5,GRF5	growth-regulating factor 5	LOC_Os06g02560.3	growth-regulating factor, putative, expressed
Sobic.001G278800	HD-ZIP	SN005 specific response	ME1	-1.07475	--	-1.54052	-1.9976	--	--	--	--	-2.24228	--	Homeobox-leucine zipper protein HOX15 OS=Oryza sativa subsp. japonica (Rice) PE=2 SV=1	AT4G37790.1	HAT22	Homeobox-leucine zipper protein family	LOC_Os10g01470.1	homeobox associated leucine zipper, putative, expressed
Sobic.001G468400	HD-ZIP	SN005 specific response	ME1	--	--	--	--	--	1.62144	--	--	--	--	Homeobox-leucine zipper protein HOX12 GN=OsJ_009423 OS=Oryza sativa subsp. japonica (Rice) PE=2 SV=1	AT2G18550.1	ATHB21,HB-2,HB21	homeobox protein 21	LOC_Os03g10210.1	homeobox domain containing protein, expressed
Sobic.004G313900	HD-ZIP	SN005 specific response	ME1	--	--	--	--	--	--	--	-1.30828	--	-2.43084	Homeobox-leucine zipper protein ROC8 OS=Oryza sativa subsp. japonica (Rice) PE=2 SV=2	AT1G73360.1	ATHDG11,EDT1,HDG11	homeodomain GLABROUS 11	LOC_Os06g10600.1	homeobox and START domains containing protein, putative, expressed
Sobic.010G078700	HD-ZIP	SN005 specific response	ME1	--	--	-1.69993	--	--	--	--	-1.39759	--	-3.36557	Homeobox-leucine zipper protein ROC8 OS=Oryza sativa subsp. japonica (Rice) PE=2 SV=2	AT1G73360.1	ATHDG11,EDT1,HDG11	homeodomain GLABROUS 11	LOC_Os06g10600.1	homeobox and START domains containing protein, putative, expressed
Sobic.001G147000	LBD	SN005 specific response	ME1	--	--	--	--	--	--	2.16395	--	--	--	LOB domain-containing protein 4 GN=T19E23.11 OS=Arabidopsis thaliana (Mouse-ear cress) PE=2 SV=1	AT2G30130.1	ASL5,LBD12,PCK1	Lateral organ boundaries (LOB) domain family protein	LOC_Os03g45750.1	DUF260 domain containing protein, putative, expressed
Sobic.009G025900	LBD	SN005 specific response	ME1	--	--	--	--	--	1.48623	--	--	--	--	LOB domain-containing protein 1 GN=F24B9.1 OS=Arabidopsis thaliana (Mouse-ear cress) PE=2 SV=1	AT2G28500.1	LBD11	LOB domain-containing protein 11	LOC_Os03g17810.1	DUF260 domain containing protein, putative, expressed
Sobic.009G199300	LBD	SN005 specific response	ME1	--	--	--	-2.12834	--	--	-1.13295	--	--	--	LOB domain-containing protein 41 GN=F16B3.18 OS=Arabidopsis thaliana (Mouse-ear cress) PE=2 SV=1	AT3G02550.1	LBD41	LOB domain-containing protein 41	LOC_Os01g32770.1	DUF260 domain containing protein, putative, expressed
Sobic.003G183800	MYB	SN005 specific response	ME1	--	--	--	--	--	--	--	--	--	-1.6876	Myb-related protein Hv33 GN=MYB2 OS=Hordeum vulgare (Barley) PE=2 SV=3	AT5G26660.1	ATMYB86,MYB86	myb domain protein 86	LOC_Os01g36460.1	MYB family transcription factor, putative, expressed
Sobic.004G070900	MYB	SN005 specific response	ME1	1.29124	--	--	1.27734	1.47268	1.2073	--	--	--	--	Transcription factor MYB44 GN=K8K14.2 OS=Arabidopsis thaliana (Mouse-ear cress) PE=2 SV=1	AT5G67300.1	ATMYB44,ATMYBR1,MYB44,MYBR1	myb domain protein r1	LOC_Os02g09480.1	myb-like DNA-binding domain containing protein, putative, expressed
Sobic.004G191800	MYB	SN005 specific response	ME1	--	--	--	--	--	--	--	--	--	-2.83968	Transcription factor MYB39 GN=dl4925c OS=Arabidopsis thaliana (Mouse-ear cress) PE=2 SV=1	AT5G15310.1	ATMIXTA,ATMYB16,MYB16	myb domain protein 16	LOC_Os02g36890.1	MYB family transcription factor, putative, expressed
Sobic.007G136500	MYB	SN005 specific response	ME1	--	--	--	--	--	--	--	--	--	-2.37255	Transcription factor MYB39 GN=dl4925c OS=Arabidopsis thaliana (Mouse-ear cress) PE=2 SV=1	AT3G01140.1	AtMYB106,MYB106,NOK	myb domain protein 106	LOC_Os08g33660.1	MYB family transcription factor, putative, expressed
Sobic.007G177100	MYB	SN005 specific response	ME1	--	--	2.00023	--	--	1.60565	1.29026	--	--	--	Myb-related protein Zm38 OS=Zea mays (Maize) PE=2 SV=1	AT4G34990.1	AtMYB32,MYB32	myb domain protein 32	LOC_Os08g43550.1	MYB family transcription factor, putative, expressed
Sobic.009G157500	MYB	SN005 specific response	ME1	--	--	-1.59932	-1.63243	--	--	-1.10389	--	-1.2765	--	Transcription factor DIVARICATA GN=DIVARICATA OS=Antirrhinum majus (Garden snapdragon) PE=2 SV=1	AT2G38090.1	--	Duplicated homeodomain-like superfamily protein	LOC_Os05g37730.1	MYB family transcription factor, putative, expressed
Sobic.010G201388	MYB	SN005 specific response	ME1	1.26131	--	--	--	--	1.43659	--	--	--	--	Transcription factor MYB44 GN=K8K14.2 OS=Arabidopsis thaliana (Mouse-ear cress) PE=2 SV=1	AT4G37260.1	ATMYB73,MYB73	myb domain protein 73	LOC_Os06g43090.1	MYB transcription factor TaMYB1, putative, expressed
Sobic.001G295600	MYB_related	SN005 specific response	ME1	-1.48103	-1.94866	-2.13446	--	-1.39857	--	-1.37148	-1.8789	--	--	Transcription factor DIVARICATA GN=DIVARICATA OS=Antirrhinum majus (Garden snapdragon) PE=2 SV=1	AT5G61620.1	--	myb-like transcription factor family protein	LOC_Os10g41260.1	MYB family transcription factor, putative, expressed
Sobic.001G541000	MYB_related	SN005 specific response	ME1	--	--	--	--	--	1.11985	--	--	--	--	Vegetative cell wall protein gp1 (Precursor) GN=GP1 OS=Chlamydomonas reinhardtii (Chlamydomonas smithii) PE=2 SV=1	AT1G15720.1	TRFL5	TRF-like 5	LOC_Os06g08290.1	MYB family transcription factor, putative, expressed
Sobic.003G231700	MYB_related	SN005 specific response	ME1	--	--	--	-4.96432	-3.42528	--	--	-2.42462	-3.3806	-2.4859	Protein RADIALIS-like 3 GN=RL3 OS=Arabidopsis thaliana (Mouse-ear cress) PE=2 SV=1	AT1G75250.1	ATRL6,RL6,RSM3	RAD-like 6	LOC_Os01g44370.1	MYB family transcription factor, putative
Sobic.003G231800	MYB_related	SN005 specific response	ME1	--	--	--	-2.45158	-1.84106	--	-1.00216	--	-2.37206	-1.65859	Protein RADIALIS-like 3 GN=RL3 OS=Arabidopsis thaliana (Mouse-ear cress) PE=2 SV=1	AT4G39250.1	ATRL1,RL1,RSM2	RAD-like 1	LOC_Os05g50340.1	MYB family transcription factor, putative, expressed
Sobic.009G244300	MYB_related	SN005 specific response	ME1	--	--	--	-1.20648	--	--	--	--	-1.93913	--	Protein RADIALIS-like 3 GN=RL3 OS=Arabidopsis thaliana (Mouse-ear cress) PE=2 SV=1	AT1G75250.1	ATRL6,RL6,RSM3	RAD-like 6	LOC_Os05g50340.1	MYB family transcription factor, putative, expressed
Sobic.002G038500	NF-YA	SN005 specific response	ME1	--	--	--	--	--	--	--	-2.01848	-1.68792	-2.74812	Nuclear transcription factor Y subunit A-2 GN=F18C1.4 OS=Arabidopsis thaliana (Mouse-ear cress) PE=2 SV=1	AT3G05690.1	ATHAP2B,HAP2B,NF-YA2,UNE8	nuclear factor Y, subunit A2	LOC_Os12g42400.1	nuclear transcription factor Y subunit, putative, expressed
Sobic.001G009200	NF-YC	SN005 specific response	ME1	-1.17315	-1.03546	-2.89081	-3.50586	-1.42743	--	--	-2.23563	-2.09004	--	Pollen-specific leucine-rich repeat extensin-like protein 1 (Precursor) GN=PEX1 OS=Arabidopsis thaliana (Mouse-ear cress) PE=2 SV=1	AT1G07980.1	NF-YC10	nuclear factor Y, subunit C10	LOC_Os03g63530.1	histone-like transcription factor and archaeal histone, putative, expressed
Sobic.001G075101	TALE	SN005 specific response	ME1	--	--	--	--	--	--	--	--	--	-3.08109	Homeobox protein rough sheath 1 GN=RS1 OS=Zea mays (Maize) PE=2 SV=1	AT4G08150.1	BP,BP1,KNAT1	KNOTTED-like from Arabidopsis thaliana	LOC_Os07g03770.1	Homeobox domain containing protein, expressed
Sobic.001G066100	TCP	SN005 specific response	ME1	--	-3.85307	--	-3.65544	--	--	--	-1.8339	-6.23062	-5.95374	Transcription factor PCF6 GN=PCF6 OS=Oryza sativa subsp. indica (Rice) PE=2 SV=1	AT4G18390.1	TCP2	TEOSINTE BRANCHED 1, cycloidea and PCF transcription factor 2	LOC_Os03g57190.1	TCP family transcription factor, putative, expressed
Sobic.002G035500	TCP	SN005 specific response	ME1	--	--	--	--	--	--	--	--	-1.93954	-2.84398	Transcription factor PCF6 GN=PCF6 OS=Oryza sativa subsp. indica (Rice) PE=2 SV=1	AT4G18390.1	TCP2	TEOSINTE BRANCHED 1, cycloidea and PCF transcription factor 2	LOC_Os07g05720.1	TCP family transcription factor, putative, expressed
Sobic.003G018700	TCP	SN005 specific response	ME1	--	--	--	--	--	--	--	--	--	-3.02102	Transcription factor PCF5 GN=PCF5 OS=Oryza sativa subsp. indica (Rice) PE=2 SV=1	AT3G15030.2	MEE35,TCP4	TCP family transcription factor 4	LOC_Os01g11550.1	TCP family transcription factor, putative, expressed
Sobic.004G225400	TCP	SN005 specific response	ME1	--	--	--	--	--	1.19843	--	--	--	-5.15024	Transcription factor TCP7 GN=TCP7 OS=Arabidopsis thaliana (Mouse-ear cress) PE=2 SV=1	AT5G23280.1	--	TCP family transcription factor	LOC_Os02g42380.1	TCP family transcription factor, putative, expressed
Sobic.004G354700	TCP	SN005 specific response	ME1	--	-6.48205	-2.9033	-6.27116	--	--	--	-2.09305	-3.40663	-2.04669	Transcription factor TCP7 GN=TCP7 OS=Arabidopsis thaliana (Mouse-ear cress) PE=2 SV=1	AT5G23280.1	--	TCP family transcription factor	LOC_Os12g07480.1	TCP family transcription factor, putative, expressed
Sobic.004G237300	TCP	SN005 specific response	ME1	--	--	--	--	--	--	--	--	--	-3.55053	Transcription factor PCF3 GN=PCF3 OS=Oryza sativa subsp. japonica (Rice) PE=2 SV=1	AT1G35560.1	--	TCP family transcription factor	LOC_Os11g07460.1	TCP family transcription factor, putative, expressed
Sobic.006G154000	TCP	SN005 specific response	ME1	--	--	--	--	--	--	--	-1.55667	--	-3.04899	Transcription factor TCP7 GN=TCP7 OS=Arabidopsis thaliana (Mouse-ear cress) PE=2 SV=1	AT5G23280.1	--	TCP family transcription factor	LOC_Os04g44440.1	TCP family transcription factor, putative, expressed
Sobic.010G092100	TCP	SN005 specific response	ME1	-1.64959	-1.44831	--	-1.69387	--	--	--	--	--	-1.72363	Transcription factor TCP14 GN=TCP14 OS=Arabidopsis thaliana (Mouse-ear cress) PE=1 SV=1	AT3G47620.1	AtTCP14,TCP14	TEOSINTE BRANCHED, cycloidea and PCF (TCP) 14	LOC_Os02g51280.1	TCP-domain protein, putative, expressed
Sobic.002G128400	WRKY	SN005 specific response	ME1	--	1.04062	3.09545	2.25919	--	--	1.30265	2.27805	2.24099	--	WRKY transcription factor 55 GN=WRKY55 OS=Arabidopsis thaliana (Mouse-ear cress) PE=2 SV=1	AT2G40740.1	ATWRKY55,WRKY55	WRKY DNA-binding protein 55	LOC_Os07g27670.1	WRKY115, expressed
Sobic.004G117600	WRKY	SN005 specific response	ME1	--	--	--	--	--	1.00753	--	--	--	--	WRKY transcription factor 22 OS=Arabidopsis thaliana (Mouse-ear cress) PE=2 SV=1	AT4G01250.1	AtWRKY22,WRKY22	WRKY family transcription factor	LOC_Os02g16540.1	WRKY39, expressed
Sobic.009G247300	WRKY	SN005 specific response	ME1	--	--	--	--	--	--	--	--	1.33341	--	Probable WRKY transcription factor 28 GN=WRKY28 OS=Arabidopsis thaliana (Mouse-ear cress) PE=2 SV=1	AT4G18170.1	ATWRKY28,WRKY28	WRKY DNA-binding protein 28	LOC_Os01g43650.1	WRKY11, expressed
Sobic.001G456000	YABBY	SN005 specific response	ME1	--	1.44448	--	--	--	--	--	--	--	-1.83416	Protein DROOPING LEAF GN=OsJ_009541 OS=Oryza sativa subsp. japonica (Rice) PE=1 SV=1	AT1G69180.1	CRC	Plant-specific transcription factor YABBY family protein	LOC_Os03g11600.2	YABBY domain containing protein, putative, expressed
Sobic.004G266800	ZF-HD	SN005 specific response	ME1	--	--	--	--	--	--	--	--	--	-1.6491	ZF-HD homeobox protein At5g65410 GN=At5g65410 OS=Arabidopsis thaliana (Mouse-ear cress) PE=1 SV=1	AT5G65410.1	ATHB25,HB25,ZFHD2	homeobox protein 25	LOC_Os02g47770.1	ZF-HD protein dimerisation region containing protein, expressed
Sobic.006G084201	ZF-HD	SN005 specific response	ME1	--	--	--	-3.15004	--	1.08913	--	--	-1.98841	--	ZF-HD homeobox protein At5g65410 GN=At5g65410 OS=Arabidopsis thaliana (Mouse-ear cress) PE=1 SV=1	AT1G75240.1	AtHB33,HB33	homeobox protein 33	LOC_Os08g37400.1	ZF-HD homeobox protein, putative, expressed
Sobic.008G020700	ZF-HD	SN005 specific response	ME1	--	--	--	--	--	--	--	--	--	-1.77939	ZF-HD homeobox protein At4g24660 GN=At4g24660 OS=Arabidopsis thaliana (Mouse-ear cress) PE=1 SV=1	AT3G28917.1	MIF2	mini zinc finger 2	LOC_Os11g03420.1	ZF-HD protein dimerisation region containing protein, expressed
Sobic.008G073200	ZF-HD	SN005 specific response	ME1	-1.95406	-1.40104	--	--	-1.50979	--	--	--	-1.45767	-1.74041	ZF-HD homeobox protein At4g24660 GN=At4g24660 OS=Arabidopsis thaliana (Mouse-ear cress) PE=1 SV=1	AT1G14440.2	AtHB31,HB31	homeobox protein 31	LOC_Os11g13930.1	ZF-HD protein dimerisation region containing protein, expressed
Sobic.002G425600	bZIP	SN005 specific response	ME2	--	--	--	--	--	--	--	1.56062	--	--	ABSCISIC ACID-INSENSITIVE 5-like protein 3 GN=T3K9.16 OS=Arabidopsis thaliana (Mouse-ear cress) PE=1 SV=1	AT2G41070.1	ATBZIP12,DPBF4,EEL	Basic-leucine zipper (bZIP) transcription factor family protein	LOC_Os07g48660.1	bZIP transcription factor domain containing protein, expressed
Sobic.010G207600	bZIP	SN005 specific response	ME2	--	--	-1.91374	--	--	--	--	-1.68648	--	--	Formin-like protein 5 GN=P0453E05.107 OS=Oryza sativa subsp. japonica (Rice) PE=2 SV=2	AT4G36730.2	GBF1	G-box binding factor 1	LOC_Os06g43870.2	expressed protein
Sobic.006G051800	CAMTA	SN005 specific response	ME2	--	--	--	-1.39366	--	--	--	--	--	1.54226	Calmodulin-binding transcription activator 4 GN=F1N21.13 OS=Arabidopsis thaliana (Mouse-ear cress) PE=1 SV=1	AT5G09410.3	CAMTA1,EICBP.B	ethylene induced calmodulin binding protein	LOC_Os04g31900.1	calmodulin-binding transcription activator 4, putative, expressed
Sobic.006G181600	G2-like	SN005 specific response	ME2	--	--	--	--	--	--	--	1.3963	--	--	Putative Myb family transcription factor At1g14600 GN=At1g14600 OS=Arabidopsis thaliana (Mouse-ear cress) PE=2 SV=2	AT1G14600.1	--	Homeodomain-like superfamily protein	LOC_Os04g47890.1	MYB family transcription factor, putative, expressed
Sobic.001G447400	HD-ZIP	SN005 specific response	ME2	--	--	--	--	--	--	--	-1.44396	--	--	Homeobox-leucine zipper protein HOX19 OS=Oryza sativa subsp. japonica (Rice) PE=2 SV=1	AT4G37790.1	HAT22	Homeobox-leucine zipper protein family	LOC_Os03g12860.1	homeobox associated leucine zipper, putative, expressed
Sobic.004G163200	HSF	SN005 specific response	ME2	2.08632	3.23723	3.56923	--	1.53371	1.96625	2.6469	3.61235	--	2.16098	Heat stress transcription factor A-3 OS=Oryza sativa subsp. japonica (Rice) PE=2 SV=1	AT5G03720.1	AT-HSFA3,HSFA3	heat shock transcription factor A3	LOC_Os02g32590.1	HSF-type DNA-binding domain containing protein, expressed
Sobic.007G224800	MYB	SN005 specific response	ME2	1.44926	--	--	--	--	--	--	-1.82298	--	--	Transcription factor MYB39 GN=dl4925c OS=Arabidopsis thaliana (Mouse-ear cress) PE=2 SV=1	AT1G34670.1	AtMYB93,MYB93	myb domain protein 93	LOC_Os08g37970.1	MYB family transcription factor, putative, expressed
Sobic.006G279400	NAC	SN005 specific response	ME2	--	--	--	--	--	--	--	-1.65026	--	--	NAC domain-containing protein 7 GN=T28K15.1 OS=Arabidopsis thaliana (Mouse-ear cress) PE=2 SV=2	AT1G71930.1	ANAC030,VND7	vascular related NAC-domain protein 7	LOC_Os08g01330.1	no apical meristem protein, putative, expressed
Sobic.001G095700	bHLH	SN005 specific response	ME3	--	-1.92843	1.93889	--	1.55482	--	--	3.36448	--	3.54539	Transcription factor bHLH92 GN=K9D7.15 OS=Arabidopsis thaliana (Mouse-ear cress) PE=2 SV=1	AT5G43650.1	BHLH92	basic helix-loop-helix (bHLH) DNA-binding superfamily protein	LOC_Os03g53020.1	helix-loop-helix DNA-binding domain containing protein, expressed
Sobic.007G051800	bHLH	SN005 specific response	ME3	--	--	2.89478	--	1.88672	--	--	3.17218	--	4.16606	Transcription factor bHLH35 GN=MUL3.10 OS=Arabidopsis thaliana (Mouse-ear cress) PE=2 SV=1	AT5G57150.1	--	basic helix-loop-helix (bHLH) DNA-binding superfamily protein	LOC_Os04g23550.1	basic helix-loop-helix family protein, putative, expressed
Sobic.010G199000	bZIP	SN005 specific response	ME3	--	--	-2.80676	--	--	--	--	--	--	2.24429	Vegetative cell wall protein gp1 (Precursor) GN=GP1 OS=Chlamydomonas reinhardtii (Chlamydomonas smithii) PE=2 SV=1	AT3G30530.1	ATBZIP42,bZIP42	basic leucine-zipper 42	LOC_Os06g42690.1	bZIP transcription factor domain containing protein, expressed
Sobic.003G320300	C2H2	SN005 specific response	ME3	--	--	--	--	-1.22726	--	--	--	--	-1.98442	Vegetative cell wall protein gp1 (Precursor) GN=GP1 OS=Chlamydomonas reinhardtii (Chlamydomonas smithii) PE=2 SV=1	AT5G54630.1	--	zinc finger protein-related	LOC_Os01g57650.1	ZOS1-12 - C2H2 zinc finger protein, expressed
Sobic.003G396600	C2H2	SN005 specific response	ME3	--	--	2.2665	--	--	--	--	--	--	-1.761	Histone deacetylase HDT3 GN=HDT3 OS=Zea mays (Maize) PE=2 SV=1	AT3G44750.1	ATHD2A,HD2A,HDA3,HDT1	histone deacetylase 3	LOC_Os05g51830.1	ZOS5-12 - C2H2 zinc finger protein, expressed
Sobic.009G155200	C2H2	SN005 specific response	ME3	--	--	2.71971	2.31288	2.52929	--	--	2.5813	2.68382	4.73031	Protein TRANSPARENT TESTA 1 GN=TT1 OS=Arabidopsis thaliana (Mouse-ear cress) PE=2 SV=1	AT3G57670.1	NTT,WIP2	C2H2-type zinc finger family protein	LOC_Os05g37190.1	ZOS5-08 - C2H2 zinc finger protein, expressed
Sobic.009G196100	Dof	SN005 specific response	ME3	--	--	--	--	--	--	--	--	--	-2.09112	Dof zinc finger protein DOF1.5 GN=F28N24.35 OS=Arabidopsis thaliana (Mouse-ear cress) PE=1 SV=1	AT2G34140.1	--	Dof-type zinc finger DNA-binding family protein	LOC_Os01g55340.1	dof zinc finger domain containing protein, putative, expressed
Sobic.002G165600	ERF	SN005 specific response	ME3	3.52187	3.80736	--	--	3.36944	--	--	--	--	2.81438	Ethylene-responsive transcription factor ERF117 GN=ERF117 OS=Arabidopsis thaliana (Mouse-ear cress) PE=2 SV=1	AT1G68550.1	--	Integrase-type DNA-binding superfamily protein	LOC_Os09g13940.1	AP2 domain containing protein, expressed
Sobic.001G304500	GRAS	SN005 specific response	ME3	--	--	--	-2.72687	--	--	--	--	-1.23622	--	Scarecrow-like protein 6 GN=SCL6 OS=Arabidopsis thaliana (Mouse-ear cress) PE=1 SV=1	AT4G00150.1	ATHAM3,HAM3	GRAS family transcription factor	LOC_Os10g40390.1	scarecrow, putative, expressed
Sobic.005G217200	MYB	SN005 specific response	ME3	--	--	--	--	--	--	-1.09399	--	--	--	Transcription factor MYB21 GN=MGF10.23 OS=Arabidopsis thaliana (Mouse-ear cress) PE=1 SV=1	AT1G48000.1	AtMYB112,MYB112	myb domain protein 112	LOC_Os12g37690.1	MYB family transcription factor, putative, expressed
Sobic.003G036600	MYB_related	SN005 specific response	ME3	--	--	1.67666	--	1.20662	--	--	1.50689	--	1.94397	Transcription factor MYB1R1 OS=Solanum tuberosum (Potato) PE=2 SV=1	AT5G47390.1	--	myb-like transcription factor family protein	LOC_Os01g09280.1	myb-related transcription activator, putative, expressed
Sobic.009G154200	MYB_related	SN005 specific response	ME3	--	--	3.10415	--	3.98881	--	--	2.46426	--	3.526	Transcription factor DIVARICATA GN=DIVARICATA OS=Antirrhinum majus (Garden snapdragon) PE=2 SV=1	AT5G04760.1	--	Duplicated homeodomain-like superfamily protein	LOC_Os05g37060.1	MYB family transcription factor, putative, expressed
Sobic.001G040200	NAC	SN005 specific response	ME3	--	--	--	--	--	--	--	--	--	1.72646	NAC domain-containing protein 67 OS=Oryza sativa subsp. japonica (Rice) PE=2 SV=1	AT5G08790.1	anac081,ATAF2	NAC (No Apical Meristem) domain transcriptional regulator superfamily protein	LOC_Os03g60080.1	NAC domain-containing protein 67, putative, expressed
Sobic.001G290400	NAC	SN005 specific response	ME3	--	--	--	--	--	--	--	--	--	1.59289	NAC domain-containing protein 78 GN=T32M21.10 OS=Arabidopsis thaliana (Mouse-ear cress) PE=2 SV=2	AT4G17980.1	anac071,NAC071	NAC domain containing protein 71	LOC_Os10g42130.1	no apical meristem protein, putative, expressed
Sobic.001G529200	NAC	SN005 specific response	ME3	--	--	--	--	--	--	--	--	--	-2.13153	NAC domain-containing protein 78 GN=T32M21.10 OS=Arabidopsis thaliana (Mouse-ear cress) PE=2 SV=2	AT1G65910.1	anac028,NAC028	NAC domain containing protein 28	LOC_Os03g02800.1	no apical meristem protein, putative, expressed
Sobic.002G259600	NAC	SN005 specific response	ME3	--	--	1.91829	--	--	--	--	--	--	-1.64707	NAC transcription factor ONAC010 OS=Oryza sativa subsp. japonica (Rice) PE=2 SV=1	AT2G33480.1	ANAC041,NAC041	NAC domain containing protein 41	LOC_Os09g33490.1	no apical meristem protein, putative, expressed
Sobic.010G227300	NAC	SN005 specific response	ME3	-1.54711	-1.47236	--	--	--	-1.52319	--	--	--	--	NAC domain-containing protein 21/22 OS=Arabidopsis thaliana (Mouse-ear cress) PE=1 SV=2	AT1G56010.2	anac021,ANAC022,NAC1	NAC domain containing protein 1	LOC_Os06g46270.1	no apical meristem protein, putative, expressed
Sobic.001G137200	TALE	SN005 specific response	ME3	--	--	--	--	--	--	--	--	--	-4.34988	BEL1-like homeodomain protein 10 OS=Arabidopsis thaliana (Mouse-ear cress) PE=1 SV=1	AT1G19700.2	BEL10,BLH10	BEL1-like homeodomain 10	LOC_Os03g47730.1	homeobox domain containing protein, expressed
Sobic.004G047500	Whirly	SN005 specific response	ME3	--	--	2.87829	--	--	--	--	--	--	-2.14981	Single-stranded DNA-bindig protein WHY2, mitochondrial (Precursor) GN=WHY2 OS=Solanum tuberosum (Potato) PE=1 SV=1	AT1G71260.1	ATWHY2,WHY2	WHIRLY 2	LOC_Os02g06370.1	whirly transcription factor domain containing protein, expressed
Sobic.001G381300	WRKY	SN005 specific response	ME3	--	-1.39624	--	--	--	--	--	1.72368	--	2.92761	Probable WRKY transcription factor 70 GN=WRKY70 OS=Arabidopsis thaliana (Mouse-ear cress) PE=2 SV=1	AT3G56400.1	ATWRKY70,WRKY70	WRKY DNA-binding protein 70	LOC_Os03g21710.1	WRKY79, expressed
Sobic.003G337900	WRKY	SN005 specific response	ME3	--	--	--	--	--	--	--	--	--	2.21641	Probable WRKY transcription factor 66 GN=WRKY66 OS=Arabidopsis thaliana (Mouse-ear cress) PE=2 SV=1	AT3G56400.1	ATWRKY70,WRKY70	WRKY DNA-binding protein 70	LOC_Os01g60640.1	WRKY21, expressed
Sobic.003G183000	bZIP	SN005 specific response	ME4	--	--	--	--	--	--	--	--	-1.88147	--	Ocs element-binding factor 1 GN=OBF1 OS=Zea mays (Maize) PE=2 SV=2	AT1G75390.1	AtbZIP44,bZIP44	basic leucine-zipper 44	LOC_Os01g36220.1	bZIP transcription factor domain containing protein, expressed
Sobic.009G237600	bZIP	SN005 specific response	ME4	1.1773	--	--	--	1.80964	--	1.0822	--	--	--	Common plant regulatory factor 1 GN=CPRF1 OS=Petroselinum crispum (Parsley) PE=2 SV=1	AT2G46270.1	GBF3	G-box binding factor 3	LOC_Os05g49420.1	transcription factor, putative, expressed
Sobic.006G135100	CO-like	SN005 specific response	ME4	--	--	-1.67222	-1.41341	--	--	--	-2.1785	-1.70259	--	Zinc finger protein CONSTANS-LIKE 4 GN=COL4 OS=Arabidopsis thaliana (Mouse-ear cress) PE=2 SV=2	AT5G57660.1	ATCOL5,COL5	CONSTANS-like 5	LOC_Os04g42020.1	CCT/B-box zinc finger protein, putative, expressed
Sobic.007G092000	CO-like	SN005 specific response	ME4	--	--	--	--	--	--	--	-1.35778	--	--	Zinc finger protein CONSTANS-LIKE 3 GN=COL3 OS=Arabidopsis thaliana (Mouse-ear cress) PE=1 SV=1	AT5G24930.1	ATCOL4,COL4	CONSTANS-like 4	LOC_Os08g15050.1	CCT/B-box zinc finger protein, putative, expressed
Sobic.002G273300	DBB	SN005 specific response	ME4	--	-1.05573	-5.43804	-3.48656	--	--	--	-4.24207	-3.42916	--	Probable salt tolerance-like protein At1g78600 GN=At1g78600 OS=Arabidopsis thaliana (Mouse-ear cress) PE=1 SV=2	AT4G38960.1	--	B-box type zinc finger family protein	LOC_Os09g35880.1	B-box zinc finger family protein, putative, expressed
Sobic.002G421900	Dof	SN005 specific response	ME4	--	--	--	-1.99329	--	--	--	--	-2.4505	--	Cyclic dof factor 2 GN=MIJ24.16 OS=Arabidopsis thaliana (Mouse-ear cress) PE=1 SV=2	AT3G47500.1	CDF3	cycling DOF factor 3	LOC_Os07g48570.1	expressed protein
Sobic.002G081300	ERF	SN005 specific response	ME4	--	--	--	-1.23527	--	--	--	--	-1.31691	--	Ethylene-responsive transcription factor LEP GN=MAC12.13 OS=Arabidopsis thaliana (Mouse-ear cress) PE=2 SV=1	AT4G27950.1	CRF4	cytokinin response factor 4	LOC_Os03g60120.1	AP2 domain containing protein, expressed
Sobic.006G202300	G2-like	SN005 specific response	ME4	1.25443	1.47835	--	-1.6395	--	1.20704	1.07617	--	--	--	Myb family transcription factor APL GN=APL OS=Arabidopsis thaliana (Mouse-ear cress) PE=2 SV=2	AT5G45580.1	--	Homeodomain-like superfamily protein	LOC_Os02g47190.1	MYB family transcription factor, putative, expressed
Sobic.010G096300	G2-like	SN005 specific response	ME4	-1.14437	-1.01247	-3.49721	-3.30415	--	--	--	-2.01844	-2.56072	--	Probable transcription factor GLK1 GN=OSJNBa0031J07.13 OS=Oryza sativa subsp. japonica (Rice) PE=2 SV=1	AT2G20570.1	ATGLK1,GLK1,GPRI1	GBF\'s pro-rich region-interacting factor 1	LOC_Os06g24070.1	myb-like DNA-binding domain containing protein, expressed
Sobic.004G312700	GeBP	SN005 specific response	ME4	--	--	--	-1.91029	--	--	--	--	-1.14087	--	Mediator-associated protein 1 GN=At4g25210 OS=Arabidopsis thaliana (Mouse-ear cress) PE=1 SV=1	AT4G00390.1	--	DNA-binding storekeeper protein-related transcriptional regulator	LOC_Os02g53150.1	expressed protein
Sobic.002G189000	HD-ZIP	SN005 specific response	ME4	--	--	--	--	1.32094	--	--	--	--	1.58285	Homeobox-leucine zipper protein HOX25 OS=Oryza sativa subsp. japonica (Rice) PE=2 SV=2	AT3G01470.1	ATHB-1,ATHB1,HAT5,HB-1,HD-ZIP-1	homeobox 1	LOC_Os09g21180.1	homeobox associated leucine zipper, putative, expressed
Sobic.006G163900	HD-ZIP	SN005 specific response	ME4	--	-2.49512	-4.49173	-1.62424	--	--	--	-3.83954	-1.57947	--	Homeobox-leucine zipper protein HOX22 OS=Oryza sativa subsp. japonica (Rice) PE=2 SV=2	AT2G46680.1	ATHB-7,ATHB7,HB-7	homeobox 7	LOC_Os04g45810.1	homeobox associated leucine zipper, putative, expressed
Sobic.003G211200	MYB_related	SN005 specific response	ME4	--	--	-3.41894	-1.43086	--	--	--	-2.1627	-1.10042	--	Transcription factor MYB1R1 OS=Solanum tuberosum (Potato) PE=2 SV=1	AT5G47390.1	--	myb-like transcription factor family protein	LOC_Os01g41900.1	Myb transcription factor, putative, expressed
Sobic.008G168300	NF-YA	SN005 specific response	ME4	--	--	-1.68394	-1.25387	--	--	--	-1.45575	-1.46875	--	Nuclear transcription factor Y subunit A-7 GN=NFYA7 OS=Arabidopsis thaliana (Mouse-ear cress) PE=2 SV=1	AT1G30500.2	NF-YA7	nuclear factor Y, subunit A7	LOC_Os12g41880.2	nuclear transcription factor Y subunit, putative, expressed
Sobic.007G063200	NF-YC	SN005 specific response	ME4	-4.55805	--	--	--	--	-4.49078	--	--	--	--	Nuclear transcription factor Y subunit C-2 OS=Arabidopsis thaliana (Mouse-ear cress) PE=2 SV=2	AT1G56170.1	ATHAP5B,HAP5B,NF-YC2	nuclear factor Y, subunit C2	LOC_Os02g07450.1	core histone H2A/H2B/H3/H4, putative, expressed
Sobic.008G060300	WRKY	SN005 specific response	ME4	-1.08734	--	--	-1.39759	--	--	-1.41176	--	--	--	Probable WRKY transcription factor 70 GN=WRKY70 OS=Arabidopsis thaliana (Mouse-ear cress) PE=2 SV=1	AT3G56400.1	ATWRKY70,WRKY70	WRKY DNA-binding protein 70	LOC_Os05g25770.1	WRKY45, expressed
Sobic.009G244200	ZF-HD	SN005 specific response	ME4	-1.27772	-1.15228	-1.62741	--	--	--	--	-1.40287	--	--	ZF-HD homeobox protein At4g24660 GN=At4g24660 OS=Arabidopsis thaliana (Mouse-ear cress) PE=1 SV=1	AT2G02540.1	ATHB21,HB21,ZFHD4	homeobox protein 21	LOC_Os05g50310.1	ZF-HD protein dimerisation region containing protein, expressed
Sobic.001G158900	bHLH	SN005 specific response	ME5	-1.47959	-1.20879	--	--	-1.26677	--	-1.08387	--	--	--	Transcription factor PIF1 GN=T2G17.2 OS=Arabidopsis thaliana (Mouse-ear cress) PE=1 SV=1	AT2G20180.3	PIF1,PIL5	phytochrome interacting factor 3-like 5	LOC_Os03g43810.1	helix-loop-helix DNA-binding domain containing protein, expressed
Sobic.007G189800	CO-like	SN005 specific response	ME5	--	--	1.46258	--	--	--	1.04435	1.4195	--	--	Zinc finger protein CONSTANS-LIKE 15 GN=COL15 OS=Arabidopsis thaliana (Mouse-ear cress) PE=2 SV=1	AT1G28050.1	--	B-box type zinc finger protein with CCT domain	LOC_Os08g42440.1	CCT/B-box zinc finger protein, putative, expressed
Sobic.010G029900	DBB	SN005 specific response	ME5	-1.42288	-2.76406	-2.98846	-7.51059	-6.4439	--	-1.35407	-2.3154	-2.27498	--	Zinc finger protein CONSTANS-LIKE 5 GN=COL5 OS=Arabidopsis thaliana (Mouse-ear cress) PE=2 SV=2
Sobic.010G254300	G2-like	SN005 specific response	ME5	--	--	-2.46102	--	--	--	--	-1.35342	--	--	Protein PHR1-LIKE 1 GN=PHL1 OS=Arabidopsis thaliana (Mouse-ear cress) PE=1 SV=1	AT3G13040.2	--	myb-like HTH transcriptional regulator family protein	LOC_Os06g49040.1	Myb-like DNA-binding domain containing protein, putative, expressed
Sobic.001G341400	GRAS	SN005 specific response	ME5	--	--	--	--	--	--	--	-1.84088	--	--	Nodulation-signaling pathway 1 protein GN=NSP1 OS=Medicago truncatula (Barrel medic) PE=1 SV=1	AT3G13840.1	--	GRAS family transcription factor	LOC_Os03g29480.1	nodulation-signaling pathway 1 protein, putative, expressed
Sobic.003G073700	M-type	SN005 specific response	ME5	--	--	--	--	--	--	--	--	-1.51093	--	MADS-box transcription factor 56 GN=OSJNBb0060I05.3 OS=Oryza sativa subsp. japonica (Rice) PE=2 SV=1	AT3G30260.1	AGL79	AGAMOUS-like 79	LOC_Os01g69850.1	OsMADS65 - MADS-box family gene with MIKC* type-box, expressed
Sobic.002G201000	MYB	SN005 specific response	ME5	--	-1.14425	-1.68562	--	-1.18627	--	--	-1.79466	--	--	Myb-related protein 306 GN=MYB306 OS=Antirrhinum majus (Garden snapdragon) PE=2 SV=1	AT3G28910.1	ATMYB30,MYB30	myb domain protein 30	LOC_Os08g33940.1	MYB family transcription factor, putative, expressed
Sobic.007G071000	NAC	SN005 specific response	ME5	-1.76586	-1.17271	--	-2.86364	-2.03655	-1.21931	-1.04108	--	-1.25777	--	NAC domain-containing protein 21/22 OS=Arabidopsis thaliana (Mouse-ear cress) PE=1 SV=2	AT1G56010.2	anac021,ANAC022,NAC1	NAC domain containing protein 1	LOC_Os08g10080.1	no apical meristem protein, putative, expressed
Sobic.004G140000	bHLH	SN005 specific response	ME6	--	--	--	--	--	--	--	--	1.28832	--	Transcription factor bHLH35 GN=MUL3.10 OS=Arabidopsis thaliana (Mouse-ear cress) PE=2 SV=1	AT5G57150.1	--	basic helix-loop-helix (bHLH) DNA-binding superfamily protein	LOC_Os04g23550.1	basic helix-loop-helix family protein, putative, expressed
Sobic.001G079500	C2H2	SN005 specific response	ME6	1.05315	--	--	--	--	--	--	--	-1.18129	--	Zinc finger protein 1 OS=Triticum aestivum (Wheat) PE=2 SV=1	AT1G27730.1	STZ,ZAT10	salt tolerance zinc finger	LOC_Os03g55540.1	ZOS3-18 - C2H2 zinc finger protein, expressed
Sobic.004G256200	CO-like	SN005 specific response	ME6	--	--	3.36188	4.12346	1.52622	--	--	2.23915	3.73792	--	Zinc finger protein CONSTANS-LIKE 9 GN=COL9 OS=Arabidopsis thaliana (Mouse-ear cress) PE=2 SV=1	AT5G48250.1	--	B-box type zinc finger protein with CCT domain	LOC_Os02g49230.2	CCT/B-box zinc finger protein, putative, expressed
Sobic.004G301000	DBB	SN005 specific response	ME6	--	--	--	--	--	--	--	--	2.2329	--	Probable salt tolerance-like protein At1g75540 GN=At1g75540 OS=Arabidopsis thaliana (Mouse-ear cress) PE=1 SV=1	AT1G75540.1	STH2	salt tolerance homolog2	LOC_Os02g43170.1	B-box zinc finger family protein, putative, expressed
Sobic.007G226600	HD-ZIP	SN005 specific response	ME6	-1.14133	--	--	--	-1.24091	--	-1.07696	--	--	--	Homeobox-leucine zipper protein HOX4 GN=OJ1595_D08.21 OS=Oryza sativa subsp. japonica (Rice) PE=1 SV=1	AT4G40060.1	ATHB-16,ATHB16,HB16	homeobox protein 16	LOC_Os09g29460.1	homeobox associated leucine zipper, putative, expressed
Sobic.010G108500	CO-like	SN005 specific response	ME7	--	--	4.04094	2.9761	--	--	--	3.13446	2.92969	--	Zinc finger protein CONSTANS-LIKE 16 GN=COL16 OS=Arabidopsis thaliana (Mouse-ear cress) PE=2 SV=2	AT1G25440.1	--	B-box type zinc finger protein with CCT domain	LOC_Os06g15330.1	CCT/B-box zinc finger protein, putative, expressed
Sobic.003G286700	HSF	SN005 specific response	ME7	--	--	5.69181	4.8029	3.71522	--	2.28165	4.50861	4.99278	4.06168	Heat stress transcription factor C-1b OS=Oryza sativa subsp. japonica (Rice) PE=2 SV=1	AT3G24520.1	AT-HSFC1,HSFC1	heat shock transcription factor C1	LOC_Os01g53220.1	HSF-type DNA-binding domain containing protein, expressed
Sobic.010G006300	TALE	SN005 specific response	ME7	--	--	--	--	--	--	--	--	-1.08247	--	Homeobox protein BEL1 homolog GN=MYC6.12 OS=Arabidopsis thaliana (Mouse-ear cress) PE=1 SV=2	AT5G41410.1	BEL1	POX (plant homeobox) family protein	LOC_Os06g01934.1	homeobox domain containing protein, expressed
Sobic.001G522500	bZIP	SN005 specific response	ME8	--	--	--	--	--	--	--	-1.52954	--	-1.78117	Transcription factor RF2a OS=Oryza sativa subsp. japonica (Rice) PE=1 SV=1	AT4G38900.2	--	Basic-leucine zipper (bZIP) transcription factor family protein	LOC_Os03g03550.1	bZIP family transcription factor, putative, expressed
Sobic.001G358900	MYB	SN005 specific response	ME8	--	--	--	--	--	--	--	--	--	-1.79161	Transcription factor MYB86 GN=F21E10.4 OS=Arabidopsis thaliana (Mouse-ear cress) PE=2 SV=1	AT1G57560.1	AtMYB50,MYB50	myb domain protein 50	LOC_Os03g25550.1	myb-like DNA-binding domain containing protein, putative, expressed
Sobic.009G216900	MYB	SN005 specific response	ME8	--	--	--	--	--	--	--	--	--	-1.51543	Myb-related protein Hv33 GN=MYB2 OS=Hordeum vulgare (Barley) PE=2 SV=3	AT5G26660.1	ATMYB86,MYB86	myb domain protein 86	LOC_Os05g46610.1	myb-like DNA-binding domain containing protein, putative, expressed
Sobic.009G224500	MYB	SN005 specific response	ME8	--	--	--	--	--	--	--	-1.31941	--	-1.9884	Transcription factor RAX1 GN=T20O7.2 OS=Arabidopsis thaliana (Mouse-ear cress) PE=2 SV=1	AT5G57620.1	AtMYB36,MYB36	myb domain protein 36	LOC_Os05g48010.1	MYB family transcription factor, putative, expressed
Sobic.003G246900	MYB_related	SN005 specific response	ME8	--	--	2.40029	--	--	--	--	2.51307	--	1.88285	Protein RADIALIS-like 3 GN=RL3 OS=Arabidopsis thaliana (Mouse-ear cress) PE=2 SV=1	AT1G75250.1	ATRL6,RL6,RSM3	RAD-like 6	LOC_Os01g47370.1	MYB family transcription factor, putative, expressed
Sobic.009G231600	NAC	SN005 specific response	ME8	--	--	--	--	--	--	--	-1.287	--	--	NAC domain-containing protein 8 GN=NAC008 OS=Arabidopsis thaliana (Mouse-ear cress) PE=2 SV=1	AT4G28500.1	ANAC073,NAC073,SND2	NAC domain containing protein 73	LOC_Os05g48850.1	no apical meristem protein, putative, expressed
Sobic.001G084000	WRKY	SN005 specific response	ME8	--	--	1.97586	--	--	--	--	--	--	2.20172	Probable WRKY transcription factor 48 GN=WRKY48 OS=Arabidopsis thaliana (Mouse-ear cress) PE=2 SV=1	AT1G69310.2	ATWRKY57,WRKY57	WRKY DNA-binding protein 57	LOC_Os03g55080.1	WRKY3, expressed
Sobic.008G157100	bZIP	SN005 specific response	ME9	-2.31867	-2.35988	-1.61467	-6.27763	--	--	--	--	-4.11034	--	Light-inducible protein CPRF2 GN=CPRF2 OS=Petroselinum crispum (Parsley) PE=2 SV=2	AT5G28770.2	AtbZIP63,BZO2H3	bZIP transcription factor family protein	LOC_Os12g40920.1	bZIP transcription factor domain containing protein, expressed
Sobic.010G164400	HSF	SN005 specific response	ME9	1.42333	--	--	2.83644	3.05848	1.9531	1.78064	--	3.21057	2.80292	Heat stress transcription factor C-2b OS=Oryza sativa subsp. japonica (Rice) PE=2 SV=1	AT3G24520.1	AT-HSFC1,HSFC1	heat shock transcription factor C1	LOC_Os06g35960.1	HSF-type DNA-binding domain containing protein, expressed
Sobic.004G303600	MYB	SN005 specific response	ME9	--	--	--	--	--	--	--	--	1.79407	--	Transcription factor LAF1 GN=M7J2.70 OS=Arabidopsis thaliana (Mouse-ear cress) PE=1 SV=2	AT1G09540.1	ATMYB61,MYB61	myb domain protein 61	LOC_Os02g42850.2	MYB family transcription factor, putative, expressed
Sobic.010G077250	MYB	SN005 specific response	ME9	3.29741	3.04049	3.08911	2.85309	--	2.41352	2.57556	--	2.98964	2.09476	Anthocyanin regulatory C1 protein GN=C1 OS=Zea mays (Maize) PE=2 SV=1	AT5G49330.1	ATMYB111,MYB111,PFG3	myb domain protein 111	LOC_Os06g10350.1	MYB family transcription factor, putative, expressed
Sobic.003G037400	WRKY	SN005 specific response	ME9	-3.18781	-2.76343	--	-3.88356	-2.36655	--	--	--	-3.131	-2.06729	Probable WRKY transcription factor 50 GN=WRKY50 OS=Arabidopsis thaliana (Mouse-ear cress) PE=2 SV=1	AT5G64810.1	ATWRKY51,WRKY51	WRKY DNA-binding protein 51	LOC_Os01g09100.1	WRKY10, expressed
Sobic.008G172200	TCP	SN005 specific response	ME10	--	--	--	--	--	-1.63234	--	--	--	--	Transcription factor PCF8 GN=PCF8 OS=Oryza sativa subsp. japonica (Rice) PE=2 SV=1	AT1G30210.2	ATTCP24,TCP24	TEOSINTE BRANCHED 1, cycloidea, and PCF family 24	LOC_Os12g02090.1	TCP family transcription factor, putative, expressed
Sobic.003G353000	WRKY	SN005 specific response	ME10	--	--	--	--	--	-1.78066	--	--	--	-2.10892	Probable WRKY transcription factor 49 GN=WRKY49 OS=Arabidopsis thaliana (Mouse-ear cress) PE=2 SV=1	AT5G43290.1	ATWRKY49,WRKY49	WRKY DNA-binding protein 49	LOC_Os01g62514.1	WRKY56, expressed
Sobic.004G237300	TCP	SN005 specific response	ME12	--	-1.618	--	-3.80899	--	--	--	--	-5.03024	-4.7587	Transcription factor PCF3 GN=PCF3 OS=Oryza sativa subsp. japonica (Rice) PE=2 SV=1	AT1G58100.1	--	TCP family transcription factor	LOC_Os12g07480.1	TCP family transcription factor, putative, expressed
Sobic.007G173200	C2H2	SN005 specific response	ME13	--	--	--	--	--	-1.16927	-1.44706	--	--	--	Zinc finger protein MAGPIE GN=MGP OS=Arabidopsis thaliana (Mouse-ear cress) PE=1 SV=1	AT3G50700.1	AtIDD2,IDD2	indeterminate(ID)-domain 2	LOC_Os08g44050.1	ZOS8-12 - C2H2 zinc finger protein, expressed
Sobic.002G174200	WRKY	SN005 specific response	ME13	1.19735	1.47835	1.76642	--	--	1.75088	1.23848	1.63874	--	--	Probable WRKY transcription factor 53 GN=WRKY53 OS=Arabidopsis thaliana (Mouse-ear cress) PE=1 SV=1	AT2G46400.1	ATWRKY46,WRKY46	WRKY DNA-binding protein 46	LOC_Os09g16510.1	WRKY74, expressed
Sobic.001G397900	MYB	SN005 specific response	ME14	--	2.46017	2.19673	--	--	--	--	--	1.24705	--	Myb-related protein P GN=P OS=Zea mays (Maize) PE=2 SV=1	AT2G47460.1	ATMYB12,MYB12,PFG1	myb domain protein 12	LOC_Os03g19120.1	MYB family transcription factor, putative, expressed
Sobic.007G092300	MYB	SN005 specific response	ME15	--	--	--	--	--	--	--	--	--	-3.18326	Transcription factor RAX3 GN=T16K5.40 OS=Arabidopsis thaliana (Mouse-ear cress) PE=2 SV=1	AT5G57620.1	AtMYB36,MYB36	myb domain protein 36	LOC_Os08g15020.1	MYB family transcription factor, putative, expressed
Sobic.003G297600	ERF	SN005 specific response	ME16	3.50098	3.63319	2.53191	--	--	1.77003	1.90816	--	--	--	Pathogenesis-related genes transcriptional activator PTI5 GN=PTI5 OS=Solanum lycopersicum (Tomato) PE=2 SV=1	AT2G44840.1	ATERF13,EREBP,ERF13	ethylene-responsive element binding factor 13	LOC_Os01g54890.1	ethylene-responsive transcription factor 2, putative, expressed
Sobic.010G170600	HSF	SN005 specific response	ME16	1.68465	1.35906	--	--	--	--	1.48243	--	--	--	Putative heat stress transcription factor A-6a OS=Oryza sativa subsp. japonica (Rice) PE=2 SV=1	AT3G51910.1	AT-HSFA7A,HSFA7A	heat shock transcription factor A7A	LOC_Os06g36930.1	HSF-type DNA-binding domain containing protein, expressed
Sobic.003G394900	C2H2	SN005 specific response	ME17	--	--	--	--	--	1.08581	1.27904	1.48942	--	--	Lysine-specific demethylase REF6 GN=T29H11_50 OS=Arabidopsis thaliana (Mouse-ear cress) PE=1 SV=1	AT3G48430.1	REF6	relative of early flowering 6	LOC_Os01g67970.1	ZOS1-20 - C2H2 zinc finger protein, expressed
Sobic.007G188701	ERF	SN005 specific response	ME20	--	--	--	--	--	--	2.16269	--	--	2.68807	Ethylene-responsive transcription factor ERF115 GN=ERF115 OS=Arabidopsis thaliana (Mouse-ear cress) PE=2 SV=1	AT5G13330.1	Rap2.6L	related to AP2 6l	LOC_Os04g32620.1	ethylene-responsive transcription factor ERF114, putative, expressed
Sobic.009G235500	MYB_related	SN005 specific response	ME22	1.42324	2.07504	2.06971	-1.21501	--	1.0123	--	--	--	--	Protein RADIALIS-like 1 GN=T22F8.150 OS=Arabidopsis thaliana (Mouse-ear cress) PE=2 SV=1	AT4G39250.1	ATRL1,RL1,RSM2	RAD-like 1	LOC_Os05g49240.1	homeodomain-related, putative, expressed
Sobic.003G334600	NAC	SN005 specific response	ME22	1.44352	1.96544	3.00741	--	2.16591	2.94034	1.83769	2.61174	--	2.13993	NAC domain-containing protein 68 OS=Oryza sativa subsp. japonica (Rice) PE=2 SV=1	AT5G08790.1	anac081,ATAF2	NAC (No Apical Meristem) domain transcriptional regulator superfamily protein	LOC_Os01g60020.1	NAC domain transcription factor, putative, expressed
Sobic.008G164800	NAC	SN005 specific response	ME22	-2.02573	-2.5773	-2.38279	-1.44701	--	-1.80652	--	--	--	--	NAC domain-containing protein 21/22 OS=Arabidopsis thaliana (Mouse-ear cress) PE=1 SV=2	AT1G56010.2	anac021,ANAC022,NAC1	NAC domain containing protein 1	LOC_Os12g41680.1	No apical meristem protein, putative, expressed
Sobic.005G086700	ZF-HD	SN005 specific response	ME22	--	--	--	--	-4.27156	1.46406	--	--	--	--	ZF-HD homeobox protein At5g65410 GN=At5g65410 OS=Arabidopsis thaliana (Mouse-ear cress) PE=1 SV=1	AT2G02540.1	ATHB21,HB21,ZFHD4	homeobox protein 21	LOC_Os11g13930.1	ZF-HD protein dimerisation region containing protein, expressed
Sobic.001G075700	AP2	--	--	--	--	--	--	--	1.27652	--	--	--	-2.87626	AP2-like ethylene-responsive transcription factor ANT GN=T28I19.30 OS=Arabidopsis thaliana (Mouse-ear cress) PE=1 SV=2	AT4G37750.1	ANT,CKC,CKC1,DRG	Integrase-type DNA-binding superfamily protein	LOC_Os03g56050.1	AP2-like ethylene-responsive transcription factor AINTEGUMENTA, putative, expressed
Sobic.001G448000	AP2	--	--	--	--	--	--	--	--	--	--	-3.66791	-3.52112	AP2-like ethylene-responsive transcription factor ANT GN=T28I19.30 OS=Arabidopsis thaliana (Mouse-ear cress) PE=1 SV=2	AT4G37750.1	ANT,CKC,CKC1,DRG	Integrase-type DNA-binding superfamily protein	LOC_Os01g67410.1	AP2/EREBP transcription factor BABY BOOM, putative, expressed
Sobic.002G022600	AP2	--	--	--	--	--	--	--	1.11171	--	--	-3.8722	-3.8134	AP2-like ethylene-responsive transcription factor ANT GN=T28I19.30 OS=Arabidopsis thaliana (Mouse-ear cress) PE=1 SV=2	AT4G37750.1	ANT,CKC,CKC1,DRG	Integrase-type DNA-binding superfamily protein	LOC_Os03g56050.1	AP2-like ethylene-responsive transcription factor AINTEGUMENTA, putative, expressed
Sobic.006G245500	AP2	--	--	--	--	--	--	--	1.38419	--	--	--	--	AP2-like ethylene-responsive transcription factor AIL5 GN=AIL5 OS=Arabidopsis thaliana (Mouse-ear cress) PE=2 SV=2	AT5G57390.1	AIL5,CHO1,EMK	AINTEGUMENTA-like 5	LOC_Os04g55970.2	AP2-like ethylene-responsive transcription factor AINTEGUMENTA, putative, expressed
Sobic.002G290600	ARF	--	--	--	--	--	--	3.62193	--	--	--	--	--	Auxin response factor 10 OS=Oryza sativa subsp. japonica (Rice) PE=2 SV=3	AT4G30080.1	ARF16	auxin response factor 16	LOC_Os02g41800.1	auxin response factor, putative, expressed
Sobic.006G255300	ARF	--	--	--	--	--	--	-2.2491	1.79244	1.44425	--	--	-4.84995	Auxin response factor 11 GN=OSJNBa0084K01.22 OS=Oryza sativa subsp. japonica (Rice) PE=2 SV=1	AT1G19850.1	ARF5,IAA24,MP	Transcriptional factor B3 family protein / auxin-responsive factor AUX/IAA-related	LOC_Os04g56850.1	auxin response factor, putative, expressed
Sobic.001G479600	B3	--	--	--	--	--	--	--	1.67262	--	--	--	-4.04142	B3 domain-containing protein Os03g0184500 OS=Oryza sativa subsp. japonica (Rice) PE=2 SV=1	AT3G19184.1	--	AP2/B3-like transcriptional factor family protein	LOC_Os03g08620.1	B3 DNA binding domain containing protein, expressed
Sobic.003G393600	B3	--	--	-5.5271	--	--	-5.22726	-5.19181	--	--	--	--	--	B3 domain-containing protein Os01g0905400 OS=Oryza sativa subsp. japonica (Rice) PE=2 SV=1	AT2G24700.1	--	Transcriptional factor B3 family protein	LOC_Os01g67830.1	B3 DNA binding domain containing protein, expressed
Sobic.005G041400	B3	--	--	--	--	--	--	--	1.80532	--	--	--	-2.37011	B3 domain-containing protein Os11g0156000 OS=Oryza sativa subsp. japonica (Rice) PE=2 SV=1	AT5G06250.2	--	AP2/B3-like transcriptional factor family protein	LOC_Os12g06080.1	expressed protein
Sobic.006G217500	B3	--	--	--	--	3.2481	--	--	--	--	--	--	--	B3 domain-containing protein Os06g0194400 OS=Oryza sativa subsp. japonica (Rice) PE=2 SV=1	AT3G19184.1	--	AP2/B3-like transcriptional factor family protein	LOC_Os06g09420.1	B3 DNA binding domain containing protein, expressed
Sobic.007G076800	B3	--	--	--	--	--	--	--	--	--	--	-1.93975	-3.44089	B3 domain-containing protein Os06g0194400 OS=Oryza sativa subsp. japonica (Rice) PE=2 SV=1	AT3G19184.1	--	AP2/B3-like transcriptional factor family protein	LOC_Os06g09420.1	B3 DNA binding domain containing protein, expressed
Sobic.008G149100	B3	--	--	-2.11705	-1.93936	-4.04346	-2.96875	--	--	--	--	--	--	B3 domain-containing protein Os12g0592300 OS=Oryza sativa subsp. japonica (Rice) PE=2 SV=2	AT4G33280.1	--	AP2/B3-like transcriptional factor family protein	LOC_Os12g40120.1	B3 DNA binding domain containing protein, expressed
Sobic.001G140800	bHLH	--	--	--	--	--	--	--	1.18391	--	--	--	-3.97	Transcription factor bHLH18 GN=T30L20.1 OS=Arabidopsis thaliana (Mouse-ear cress) PE=2 SV=1	AT4G37850.1	--	basic helix-loop-helix (bHLH) DNA-binding superfamily protein	LOC_Os03g46860.1	helix-loop-helix DNA-binding protein, putative, expressed
Sobic.002G224500	bHLH	--	--	--	--	--	--	--	--	--	--	--	1.61173	Transcription factor HEC1 GN=K21H1.2 OS=Arabidopsis thaliana (Mouse-ear cress) PE=1 SV=1	AT5G67060.1	HEC1	basic helix-loop-helix (bHLH) DNA-binding superfamily protein	LOC_Os09g28210.1	bHelix-loop-helix transcription factor, putative, expressed
Sobic.002G230000	bHLH	--	--	--	--	--	--	--	--	--	--	--	2.12732	Transcription factor bHLH30 OS=Arabidopsis thaliana (Mouse-ear cress) PE=1 SV=1	AT3G56770.1	--	basic helix-loop-helix (bHLH) DNA-binding superfamily protein	LOC_Os09g28900.1	basic helix-loop-helix, putative, expressed
Sobic.002G359200	bHLH	--	--	1.48471	--	--	--	--	--	--	--	--	--	Transcription factor bHLH84 GN=BHLH84 OS=Arabidopsis thaliana (Mouse-ear cress) PE=2 SV=1	AT2G14760.1	--	basic helix-loop-helix (bHLH) DNA-binding superfamily protein	LOC_Os07g39940.1	helix-loop-helix DNA-binding domain containing protein, expressed
Sobic.003G004500	bHLH	--	--	--	--	--	4.24532	5.40855	--	--	--	--	--	Transcription factor bHLH13 GN=F6F3.7 OS=Arabidopsis thaliana (Mouse-ear cress) PE=2 SV=1	AT2G46510.1	AIB,ATAIB	ABA-inducible BHLH-type transcription factor	LOC_Os01g13460.1	helix-loop-helix DNA-binding domain containing protein, expressed
Sobic.006G076900	bHLH	--	--	--	--	--	--	3.41653	--	--	--	--	--	Anthocyanin regulatory R-S protein GN=R-S OS=Zea mays (Maize) PE=2 SV=1	AT1G63650.3	ATMYC-2,EGL1,EGL3	basic helix-loop-helix (bHLH) DNA-binding superfamily protein	LOC_Os04g47080.1	anthocyanin regulatory Lc protein, putative, expressed
Sobic.007G155300	bHLH	--	--	-2.8029	-3.17556	-2.03909	--	--	--	--	--	--	--	Transcription factor HEC2 GN=F11C1.170 OS=Arabidopsis thaliana (Mouse-ear cress) PE=1 SV=1	AT3G50330.1	HEC2	basic helix-loop-helix (bHLH) DNA-binding superfamily protein	LOC_Os08g36740.1	bHelix-loop-helix transcription factor, putative, expressed
Sobic.007G183100	bHLH	--	--	--	--	--	--	--	--	--	--	-2.16262	--	Transcription factor MYC2 GN=At1g32640 OS=Arabidopsis thaliana (Mouse-ear cress) PE=1 SV=2	AT1G32640.1	ATMYC2,JAI1,JIN1,MYC2,RD22BP1,ZBF1	Basic helix-loop-helix (bHLH) DNA-binding family protein	LOC_Os09g34330.1	helix-loop-helix DNA-binding domain containing protein, expressed
Sobic.009G073500	bHLH	--	--	--	--	2.71086	--	--	--	--	--	--	--	Putative transcription factor bHLH041 GN=MHM17.7 OS=Arabidopsis thaliana (Mouse-ear cress) PE=4 SV=1	AT5G56960.1	--	basic helix-loop-helix (bHLH) DNA-binding family protein	LOC_Os05g11070.1	helix-loop-helix DNA-binding domain containing protein, expressed
Sobic.009G073800	bHLH	--	--	--	--	--	--	--	--	--	--	--	4.36047	Putative transcription factor bHLH041 GN=MHM17.7 OS=Arabidopsis thaliana (Mouse-ear cress) PE=4 SV=1	AT5G56960.1	--	basic helix-loop-helix (bHLH) DNA-binding family protein	LOC_Os01g09900.1	helix-loop-helix DNA-binding domain containing protein, expressed
Sobic.009G088100	bHLH	--	--	--	-4.80227	--	--	--	--	--	--	--	--	Transcription factor bHLH13 GN=F6F3.7 OS=Arabidopsis thaliana (Mouse-ear cress) PE=2 SV=1	AT4G16430.1	--	basic helix-loop-helix (bHLH) DNA-binding superfamily protein	LOC_Os01g13460.1	helix-loop-helix DNA-binding domain containing protein, expressed
Sobic.010G172800	bHLH	--	--	--	--	2.53882	--	--	--	--	--	3.3329	--	Putative transcription factor bHLH041 GN=MHM17.7 OS=Arabidopsis thaliana (Mouse-ear cress) PE=4 SV=1	AT5G56960.1	--	basic helix-loop-helix (bHLH) DNA-binding family protein	LOC_Os06g37410.1	helix-loop-helix DNA-binding domain containing protein, expressed
Sobic.002G021300	bZIP	--	--	--	--	--	--	2.96254	--	--	2.44042	--	4.38657	Formin-like protein 18 (Precursor) GN=B1160F02.7 OS=Oryza sativa subsp. japonica (Rice) PE=2 SV=1	AT5G38800.1	AtbZIP43,bZIP43	basic leucine-zipper 43	LOC_Os07g03220.1	bZIP transcription factor domain containing protein, expressed
Sobic.003G363600	bZIP	--	--	--	--	--	--	--	--	--	--	--	-3.17246	Transcription factor HBP-1b(c1) (Fragment) OS=Triticum aestivum (Wheat) PE=1 SV=2	AT1G08320.3	bZIP21,TGA9	bZIP transcription factor family protein	LOC_Os01g64020.1	transcription factor, putative, expressed
Sobic.001G035100	C2H2	--	--	--	--	--	--	--	--	--	--	--	3.05217	Zinc finger protein ZAT12 GN=MMN10.11 OS=Arabidopsis thaliana (Mouse-ear cress) PE=2 SV=1	AT2G28200.1	--	C2H2-type zinc finger family protein	LOC_Os03g60560.1	ZOS3-21 - C2H2 zinc finger protein, expressed
Sobic.009G084600	C2H2	--	--	--	--	--	--	--	--	--	4.23892	--	--	Transcriptional regulator SUPERMAN GN=K14B15.1 OS=Arabidopsis thaliana (Mouse-ear cress) PE=1 SV=1	AT5G43540.1	--	C2H2 and C2HC zinc fingers superfamily protein	LOC_Os05g14130.1	ZOS5-05 - C2H2 zinc finger protein, expressed
Sobic.001G127200	C3H	--	--	2.23796	--	1.7583	-3.77669	2.25752	--	--	--	--	--	Zinc finger CCCH domain-containing protein 24 GN=OSJNBb0017F17.19 OS=Oryza sativa subsp. japonica (Rice) PE=2 SV=1	AT2G41900.1	--	CCCH-type zinc finger protein with ARM repeat domain	LOC_Os03g49170.1	zinc finger family protein, putative, expressed
Sobic.003G034400	C3H	--	--	--	--	--	--	--	2.55399	2.14566	2.21022	-4.00302	-3.74124	Zinc finger CCCH domain-containing protein 2 OS=Oryza sativa subsp. japonica (Rice) PE=2 SV=1	AT4G29190.1	--	Zinc finger C-x8-C-x5-C-x3-H type family protein	LOC_Os01g09620.1	zinc finger/CCCH transcription factor, putative, expressed
Sobic.009G072100	C3H	--	--	-5.07935	-4.98844	--	-4.7822	-4.7471	1.55071	2.38014	--	--	-4.71081	Zinc finger CCCH domain-containing protein 35 OS=Oryza sativa subsp. japonica (Rice) PE=2 SV=1	AT4G29190.1	--	Zinc finger C-x8-C-x5-C-x3-H type family protein	LOC_Os05g10670.1	zinc finger CCCH type family protein, putative, expressed
Sobic.010G115800	CO-like	--	--	--	--	2.86157	2.57702	--	--	--	2.14687	2.84074	--	Zinc finger protein HD1 OS=Oryza sativa subsp. japonica (Rice) PE=2 SV=1	AT3G02380.1	ATCOL2,COL2	CONSTANS-like 2	LOC_Os06g16370.1	CCT/B-box zinc finger protein, putative, expressed
Sobic.010G123500	CO-like	--	--	--	--	--	4.75544	--	--	--	--	2.78627	--	Zinc finger protein CONSTANS-LIKE 9 GN=COL9 OS=Arabidopsis thaliana (Mouse-ear cress) PE=2 SV=1	AT3G07650.2	COL9	CONSTANS-like 9	LOC_Os06g19444.1	CCT/B-box zinc finger protein, putative, expressed
Sobic.001G159500	CPP	--	--	--	--	--	--	--	--	--	2.90759	--	--	CRC domain-containing protein TSO1 GN=TSO1 OS=Arabidopsis thaliana (Mouse-ear cress) PE=1 SV=1	AT3G22780.1	ATTSO1,TSO1	Tesmin/TSO1-like CXC domain-containing protein	LOC_Os03g43730.1	tesmin/TSO1-like CXC domain containing protein, expressed
Sobic.002G050700	CPP	--	--	--	--	-2.04267	-2.28397	-2.02575	--	--	--	-1.7865	-4.05672	Protein tesmin/TSO1-like CXC 2 OS=Arabidopsis thaliana (Mouse-ear cress) PE=1 SV=1	AT4G14770.1	ATTCX2,TCX2	TESMIN/TSO1-like CXC 2	LOC_Os07g07974.1	tesmin/TSO1-like CXC domain containing protein, expressed
Sobic.002G313800	Dof	--	--	--	-3.35487	--	-4.34587	-4.31124	--	--	--	-2.41787	-3.80136	Dof zinc finger protein DOF2.4 GN=DOF2.4 OS=Arabidopsis thaliana (Mouse-ear cress) PE=2 SV=1	AT5G60200.1	TMO6	TARGET OF MONOPTEROS 6	LOC_Os07g32510.1	dof zinc finger domain containing protein, putative, expressed
Sobic.003G121400	Dof	--	--	-1.34768	-2.87508	-4.81987	--	2.01775	-1.79933	-2.90014	-4.29583	-2.82798	1.95562	Cyclic dof factor 2 GN=MIJ24.16 OS=Arabidopsis thaliana (Mouse-ear cress) PE=1 SV=2	AT5G39660.2	CDF2	cycling DOF factor 2	LOC_Os01g15900.1	expressed protein
Sobic.008G136100	Dof	--	--	5.17588	--	--	--	--	--	-2.76366	-3.76508	-4.05054	-3.78814	Dof zinc finger protein DOF5.1 GN=DOF5.1 OS=Arabidopsis thaliana (Mouse-ear cress) PE=2 SV=1	AT5G02460.1	--	Dof-type zinc finger DNA-binding family protein	LOC_Os12g38200.1	dof zinc finger domain containing protein, putative, expressed
Sobic.004G243900	E2F/DP	--	--	--	--	--	--	--	1.5358	--	--	--	--	E2F transcription factor-like E2FE GN=T24C20.40 OS=Arabidopsis thaliana (Mouse-ear cress) PE=2 SV=1	AT3G48160.2	DEL1,E2FE,E2L3	DP-E2F-like 1	LOC_Os02g50630.1	E2F family transcription factor protein, putative, expressed
Sobic.007G210700	EIL	--	--	--	-5.33402	-5.33033	-5.84164	--	--	-5.21922	--	--	-4.63587	ETHYLENE INSENSITIVE 3-like 3 protein GN=EIL3 OS=Arabidopsis thaliana (Mouse-ear cress) PE=1 SV=1	AT1G73730.1	AtEIL3,ATSLIM,EIL3,SLIM1	ETHYLENE-INSENSITIVE3-like 3	LOC_Os08g39830.1	ethylene-insensitive 3, putative, expressed
Sobic.001G473900	ERF	--	--	--	--	--	--	4.36487	--	--	--	--	--	Ethylene-responsive transcription factor RAP2-4 OS=Arabidopsis thaliana (Mouse-ear cress) PE=1 SV=1	AT1G78080.1	RAP2.4	related to AP2 4	LOC_Os03g09170.1	ethylene-responsive transcription factor, putative, expressed
Sobic.001G002500	ERF	--	--	--	--	--	--	--	2.95054	--	--	--	--	Ethylene-responsive transcription factor 1B GN=K14B15.15 OS=Arabidopsis thaliana (Mouse-ear cress) PE=1 SV=2	AT3G23240.1	ATERF1,ERF1	ethylene response factor 1	LOC_Os03g64260.1	AP2 domain containing protein, expressed
Sobic.002G260800	ERF	--	--	--	--	3.36197	--	--	--	--	--	--	--	Ethylene-responsive transcription factor ERF114 GN=ERF114 OS=Arabidopsis thaliana (Mouse-ear cress) PE=2 SV=1	AT5G61890.1	--	Integrase-type DNA-binding superfamily protein	LOC_Os06g09390.1	AP2 domain containing protein, expressed
Sobic.002G269100	ERF	--	--	--	--	--	--	--	--	--	3.49595	--	--	Dehydration-responsive element-binding protein 1H GN=OSJNOa273B05.9 OS=Oryza sativa subsp. japonica (Rice) PE=3 SV=1	AT5G51990.1	CBF4,DREB1D	C-repeat-binding factor 4	LOC_Os09g35020.1	AP2 domain containing protein, expressed
Sobic.003G028000	ERF	--	--	--	--	--	--	3.09081	--	--	--	--	2.85121	Ethylene-responsive transcription factor TINY GN=F18A17.60 OS=Arabidopsis thaliana (Mouse-ear cress) PE=2 SV=1	AT5G11590.1	TINY2	Integrase-type DNA-binding superfamily protein	LOC_Os01g10370.1	AP2 domain containing protein, expressed
Sobic.003G085600	ERF	--	--	--	-5.5184	2.03301	-5.30995	-5.27444	1.24344	--	--	--	-1.67102	Ethylene-responsive transcription factor ERF118 GN=ERF118 OS=Arabidopsis thaliana (Mouse-ear cress) PE=2 SV=1	AT1G68550.2	--	Integrase-type DNA-binding superfamily protein	LOC_Os01g04020.1	AP2 domain containing protein, expressed
Sobic.003G243500	ERF	--	--	--	--	--	--	--	2.22502	1.64908	--	--	--	Ethylene-responsive transcription factor CRF2 GN=F9D16.220 OS=Arabidopsis thaliana (Mouse-ear cress) PE=1 SV=1	AT4G27950.1	CRF4	cytokinin response factor 4	LOC_Os01g46870.1	AP2 domain containing protein, expressed
Sobic.004G331300	ERF	--	--	--	--	--	--	--	--	--	--	--	-2.93167	Ethylene-responsive transcription factor ERF003 GN=ERF003 OS=Arabidopsis thaliana (Mouse-ear cress) PE=2 SV=1	AT5G25190.1	--	Integrase-type DNA-binding superfamily protein	LOC_Os02g55380.1	AP2 domain containing protein, expressed
Sobic.005G014800	ERF	--	--	--	--	--	--	--	2.21287	--	--	--	--	Pathogenesis-related genes transcriptional activator PTI6 GN=PTI6 OS=Solanum lycopersicum (Tomato) PE=2 SV=1	AT4G27950.1	CRF4	cytokinin response factor 4	LOC_Os05g25260.1	AP2 domain containing protein, expressed
Sobic.005G087600	ERF	--	--	--	--	--	--	--	4.83258	--	--	--	--	Ethylene-responsive transcription factor ERF021 GN=ERF021 OS=Arabidopsis thaliana (Mouse-ear cress) PE=2 SV=1	AT1G71450.1	--	Integrase-type DNA-binding superfamily protein	LOC_Os11g13840.1	AP2 domain containing protein, expressed
Sobic.006G184800	ERF	--	--	--	--	--	--	--	--	--	2.29837	--	--	Dehydration-responsive element-binding protein 1E GN=OSJNBa0019K04.2 OS=Oryza sativa subsp. japonica (Rice) PE=2 SV=1	AT5G51990.1	CBF4,DREB1D	C-repeat-binding factor 4	LOC_Os04g48350.1	dehydration-responsive element-binding protein, putative, expressed
Sobic.007G077001	ERF	--	--	--	--	2.21515	--	--	--	--	--	--	--	Ethylene-responsive transcription factor 4 GN=At3g15210 OS=Arabidopsis thaliana (Mouse-ear cress) PE=1 SV=1	AT1G03800.1	ATERF10,ERF10	ERF domain protein 10	LOC_Os01g12440.1	AP2 domain containing protein, expressed
Sobic.007G156700	ERF	--	--	--	--	--	--	3.28568	--	--	3.575	--	--	Ethylene-responsive transcription factor ERF109 GN=ERF109 OS=Arabidopsis thaliana (Mouse-ear cress) PE=1 SV=1	AT4G34410.1	RRTF1	redox responsive transcription factor 1	LOC_Os08g36920.1	AP2 domain containing protein, expressed
Sobic.008G050600	ERF	--	--	--	--	--	--	--	--	--	--	--	3.5238	Ethylene-responsive transcription factor ABR1 GN=MVP7.8 OS=Arabidopsis thaliana (Mouse-ear cress) PE=2 SV=1	AT2G33710.1	--	Integrase-type DNA-binding superfamily protein	LOC_Os04g32620.1	ethylene-responsive transcription factor ERF114, putative, expressed
Sobic.008G145000	ERF	--	--	--	--	4.11355	--	--	--	3.79218	4.76497	--	--	Ethylene-responsive transcription factor RAP2-11 GN=T29J13.210 OS=Arabidopsis thaliana (Mouse-ear cress) PE=2 SV=1	AT5G19790.1	RAP2.11	related to AP2 11	LOC_Os12g39330.1	AP2 domain containing protein, expressed
Sobic.009G145200	ERF	--	--	4.3914	3.92393	--	--	--	3.33785	3.12831	--	--	--	Ethylene-responsive transcription factor ERF015 GN=ERF015 OS=Arabidopsis thaliana (Mouse-ear cress) PE=2 SV=1	AT4G31060.1	--	Integrase-type DNA-binding superfamily protein	LOC_Os03g09170.1	ethylene-responsive transcription factor, putative, expressed
Sobic.010G016500	ERF	--	--	--	--	--	--	--	--	--	--	4.33822	5.74684	Dehydration-responsive element-binding protein 1C OS=Oryza sativa subsp. japonica (Rice) PE=2 SV=1	AT4G25470.1	ATCBF2,CBF2,DREB1C,FTQ4	C-repeat/DRE binding factor 2	LOC_Os06g03670.1	dehydration-responsive element-binding protein, putative, expressed
Sobic.001G195550	FAR1	--	--	--	--	--	--	2.09316	--	--	--	--	--	Protein FAR1-RELATED SEQUENCE 5 GN=FRS5 OS=Arabidopsis thaliana (Mouse-ear cress) PE=2 SV=1	AT4G38180.1	FRS5	FAR1-related sequence 5	LOC_Os05g40680.1	FAR1 family protein, expressed
Sobic.002G052800	FAR1	--	--	--	--	--	--	--	--	--	--	--	-2.06298	Protein FAR1-RELATED SEQUENCE 5 GN=FRS5 OS=Arabidopsis thaliana (Mouse-ear cress) PE=2 SV=1	AT4G38180.1	FRS5	FAR1-related sequence 5	LOC_Os11g19030.1	FAR1 family protein, expressed
Sobic.006G026250	FAR1	--	--	--	--	--	4.2033	--	--	--	--	--	3.52803	Protein FAR1-RELATED SEQUENCE 3 GN=FRS3 OS=Arabidopsis thaliana (Mouse-ear cress) PE=2 SV=2	AT4G38180.1	FRS5	FAR1-related sequence 5	LOC_Os06g28250.1	expressed protein
Sobic.006G119400	FAR1	--	--	1.17242	--	-4.49442	-2.73078	--	-3.65657	--	--	-4.93216	-4.66128	Protein FAR1-RELATED SEQUENCE 6 GN=FRS6 OS=Arabidopsis thaliana (Mouse-ear cress) PE=2 SV=1	AT1G52520.1	FRS6	FAR1-related sequence 6	LOC_Os12g24870.1	SWIM zinc finger family protein, putative, expressed
Sobic.003G353700	G2-like	--	--	--	--	8.02414	6.18276	--	--	--	6.8569	6.34729	--	Transcription factor PCL1 OS=Oryza sativa subsp. japonica (Rice) PE=2 SV=1	AT3G46640.3	LUX,PCL1	Homeodomain-like superfamily protein	LOC_Os01g74020.1	MYB family transcription factor, putative, expressed
Sobic.008G004200	G2-like	--	--	--	--	--	--	--	--	--	-3.17193	--	--	Putative Myb family transcription factor At1g14600 GN=At1g14600 OS=Arabidopsis thaliana (Mouse-ear cress) PE=2 SV=2	AT2G40260.1	--	Homeodomain-like superfamily protein	LOC_Os11g01480.1	MYB family transcription factor, putative, expressed
Sobic.008G036900	G2-like	--	--	-2.71256	-3.24646	--	--	--	--	--	--	--	--	Probable transcription factor GLK2 OS=Oryza sativa subsp. japonica (Rice) PE=2 SV=1	AT1G68670.1	--	myb-like transcription factor family protein	LOC_Os02g22020.1	MYB family transcription factor, putative, expressed
Sobic.003G246800	GATA	--	--	--	--	--	--	--	2.66234	--	--	--	--	GATA transcription factor 19 GN=GATA19 OS=Arabidopsis thaliana (Mouse-ear cress) PE=2 SV=2	AT4G36620.1	GATA19	GATA transcription factor 19	LOC_Os01g47360.1	GATA zinc finger domain containing protein, expressed
Sobic.001G174100	GRAS	--	--	--	--	--	--	--	--	--	--	--	3.92122	Scarecrow-like protein 9 GN=SCL9 OS=Arabidopsis thaliana (Mouse-ear cress) PE=2 SV=1	AT2G37650.1	--	GRAS family transcription factor	LOC_Os03g40080.1	GRAS family transcription factor containing protein, expressed
Sobic.001G181100	GRAS	--	--	1.23477	--	--	--	2.78595	--	--	--	--	--	Scarecrow-like protein 9 GN=SCL9 OS=Arabidopsis thaliana (Mouse-ear cress) PE=2 SV=1	AT2G37650.1	--	GRAS family transcription factor	LOC_Os03g48450.1	SCARECROW, putative, expressed
Sobic.001G327900	GRAS	--	--	-2.17438	--	-3.09828	-3.3595	--	--	--	--	--	--	Protein SHORT-ROOT 2 GN=SHR2 OS=Oryza sativa subsp. indica (Rice) PE=2 SV=1	AT4G37650.1	SGR7,SHR	GRAS family transcription factor	LOC_Os07g39820.1	SHR, putative, expressed
Sobic.002G316500	GRAS	--	--	--	-2.93922	--	-2.91477	--	--	--	--	--	--	Scarecrow-like protein 9 GN=SCL9 OS=Arabidopsis thaliana (Mouse-ear cress) PE=2 SV=1	AT2G37650.1	--	GRAS family transcription factor	LOC_Os11g47890.1	GRAS family transcription factor domain containing protein, expressed
Sobic.002G330300	GRAS	--	--	--	5.33315	4.65171	--	6.68374	--	-4.76456	-3.63193	-4.45546	-4.18853	Chitin-inducible gibberellin-responsive protein 1 GN=P0006G05.102 OS=Oryza sativa subsp. japonica (Rice) PE=2 SV=1	AT5G48150.2	PAT1	GRAS family transcription factor	LOC_Os07g36170.1	chitin-inducible gibberellin-responsive protein, putative, expressed
Sobic.002G359800	GRAS	--	--	--	--	--	--	--	--	--	--	--	-4.30737	Scarecrow-like protein 32 GN=SCL32 OS=Arabidopsis thaliana (Mouse-ear cress) PE=2 SV=1	AT3G49950.1	--	GRAS family transcription factor	LOC_Os07g40020.1	GRAS family transcription factor domain containing protein, expressed
Sobic.010G017400	GRAS	--	--	--	--	--	-3.11424	-4.12545	1.12098	--	--	-1.8896	-4.66618	Scarecrow-like protein 28 GN=SCL28 OS=Arabidopsis thaliana (Mouse-ear cress) PE=2 SV=1	AT1G63100.1	--	GRAS family transcription factor	LOC_Os06g03710.1	DELLA protein SLR1, putative, expressed
Sobic.001G139800	GRF	--	--	2.02423	--	--	--	2.89535	--	--	--	-2.63637	-1.55992	Growth-regulating factor 9 OS=Oryza sativa subsp. japonica (Rice) PE=2 SV=1	AT4G37740.1	AtGRF2,GRF2	growth-regulating factor 2	LOC_Os03g47140.1	growth regulating factor protein, putative, expressed
Sobic.004G269900	GRF	--	--	--	--	--	--	--	--	--	--	--	-2.77345	Growth-regulating factor 4 OS=Oryza sativa subsp. japonica (Rice) PE=2 SV=1	AT3G13960.1	AtGRF5,GRF5	growth-regulating factor 5	LOC_Os02g47280.2	growth-regulating factor, putative, expressed
Sobic.004G282601	GRF	--	--	--	--	--	--	--	--	--	--	--	-4.68626	Growth-regulating factor 10 OS=Oryza sativa subsp. japonica (Rice) PE=2 SV=1	AT2G36400.1	AtGRF3,GRF3	growth-regulating factor 3	LOC_Os02g45570.2	growth regulating factor protein, putative, expressed
Sobic.004G317000	GRF	--	--	--	--	--	--	--	--	-1.48938	-2.09636	-3.20832	-6.3936	Growth-regulating factor 1 GN=GRF1 OS=Oryza sativa subsp. indica (Rice) PE=2 SV=1	AT3G13960.1	AtGRF5,GRF5	growth-regulating factor 5	LOC_Os02g53690.1	growth regulating factor protein, putative, expressed
Sobic.001G286700	HD-ZIP	--	--	--	--	-1.75794	--	-1.75591	--	--	--	-1.36305	-3.92752	Homeobox-leucine zipper protein ROC3 GN=ROC3 OS=Oryza sativa subsp. indica (Rice) PE=2 SV=2	AT5G46880.1	HB-7,HDG5	homeobox-7	LOC_Os10g42490.1	homeobox and START domains containing protein, putative, expressed
Sobic.006G183200	HD-ZIP	--	--	--	--	--	1.39708	1.8303	--	--	--	--	2.17732	Homeobox-leucine zipper protein ROC4 GN=OSJNBb0032E06.7 OS=Oryza sativa subsp. japonica (Rice) PE=2 SV=2	AT3G61150.1	HD-GL2-1,HDG1	homeodomain GLABROUS 1	LOC_Os04g48070.2	homeobox and START domains containing protein, putative, expressed
Sobic.001G361100	HSF	--	--	--	--	--	--	--	1.54212	--	--	--	-3.48289	Heat stress transcription factor B-4d OS=Oryza sativa subsp. japonica (Rice) PE=2 SV=1	AT1G46264.1	AT-HSFB4,HSFB4,SCZ	heat shock transcription factor B4	LOC_Os03g25120.1	HSF-type DNA-binding domain containing protein, expressed
Sobic.002G392500	HSF	--	--	--	--	--	--	--	1.31454	--	--	-1.92461	-5.25242	Heat stress transcription factor B-4b OS=Oryza sativa subsp. japonica (Rice) PE=2 SV=1	AT1G46264.1	AT-HSFB4,HSFB4,SCZ	heat shock transcription factor B4	LOC_Os07g44690.1	HSF-type DNA-binding domain containing protein, expressed
Sobic.003G156600	M-type	--	--	--	--	--	--	--	--	-4.03917	-3.45808	--	--	Formin-like protein 3 OS=Oryza sativa subsp. japonica (Rice) PE=2 SV=2	AT5G55690.1	--	MADS-box transcription factor family protein	LOC_Os01g23760.1	OsMADS93 - MADS-box family gene with M-beta type-box, expressed
Sobic.001G158600	MYB	--	--	--	--	--	--	--	--	--	-4.97285	-3.85226	--	Transcription factor MYB98 GN=MYB98 OS=Arabidopsis thaliana (Mouse-ear cress) PE=2 SV=1	AT5G11050.1	AtMYB64,MYB64	myb domain protein 64	LOC_Os01g63680.1	MYB family transcription factor, putative, expressed
Sobic.001G219200	MYB	--	--	--	--	2.07815	--	--	--	--	--	--	--	Myb-related protein Myb4 GN=OSJNBa0073E02.6 OS=Oryza sativa subsp. japonica (Rice) PE=2 SV=2	AT3G23250.1	ATMYB15,ATY19,MYB15	myb domain protein 15	LOC_Os10g33810.1	myb-related protein Myb4, putative, expressed
Sobic.002G337800	MYB	--	--	--	--	--	--	--	--	--	--	--	3.76483	Transcription factor MYB39 GN=dl4925c OS=Arabidopsis thaliana (Mouse-ear cress) PE=2 SV=1	AT4G21440.1	ATM4,ATMYB102,MYB102	MYB-like 102	LOC_Os07g37210.1	MYB family transcription factor, putative, expressed
Sobic.003G274000	MYB	--	--	--	--	--	--	--	--	--	--	--	-3.02167	Transcription factor MYB86 GN=F21E10.4 OS=Arabidopsis thaliana (Mouse-ear cress) PE=2 SV=1	AT3G13890.2	ATMYB26,MS35,MYB26	myb domain protein 26	LOC_Os01g51260.1	MYB family transcription factor, putative, expressed
Sobic.008G131400	MYB	--	--	--	--	--	--	3.79985	--	--	--	--	1.84421	Transcription factor MYB21 GN=MGF10.23 OS=Arabidopsis thaliana (Mouse-ear cress) PE=1 SV=1	AT1G48000.1	AtMYB112,MYB112	myb domain protein 112	LOC_Os11g45740.1	MYB family transcription factor, putative, expressed
Sobic.008G137500	MYB	--	--	-1.10803	-6.65707	-5.93084	-6.44588	--	7.28326	6.76928	6.23284	4.19159	--	Protein rough sheath 2 GN=RS2 OS=Zea mays (Maize) PE=1 SV=1	AT2G37630.1	AS1,ATMYB91,ATPHAN,MYB91	myb-like HTH transcriptional regulator family protein	LOC_Os12g38400.2	MYB family transcription factor, putative, expressed
Sobic.010G106601	MYB	--	--	--	--	--	--	3.44408	--	--	--	--	5.15948	Protein ODORANT1 GN=ODO1 OS=Petunia hybrida (Petunia) PE=2 SV=1	AT5G16600.1	AtMYB43,MYB43	myb domain protein 43	LOC_Os06g14670.1	ODORANT1, putative, expressed
Sobic.001G143100	MYB_related	--	--	--	--	--	--	--	--	--	--	--	2.80436	Transcription factor ASG4 GN=F22L4.18 OS=Arabidopsis thaliana (Mouse-ear cress) PE=2 SV=1	AT3G09600.1	--	Homeodomain-like superfamily protein	LOC_Os05g07010.2	myb-like DNA-binding domain containing protein, expressed
Sobic.003G008700	MYB_related	--	--	--	--	-1.97132	-1.91393	--	--	--	--	-1.54377	-1.82595	Myb-related protein 3R-1 GN=MYB3R-1 OS=Arabidopsis thaliana (Mouse-ear cress) PE=2 SV=1	AT4G32730.2	ATMYB3R-1,ATMYB3R1,MYB3R-1,MYB3R1,PC-MYB1	Homeodomain-like protein	LOC_Os01g12860.1	MYB family transcription factor, putative, expressed
Sobic.003G088300	MYB_related	--	--	--	--	--	--	3.95822	--	--	--	--	--	Myb-related protein 308 GN=MYB308 OS=Antirrhinum majus (Garden snapdragon) PE=2 SV=1	AT5G16770.1	AtMYB9,MYB9	myb domain protein 9	LOC_Os07g44090.2	myb-related protein Hv33, putative, expressed
Sobic.004G279300	MYB_related	--	--	-2.1568	-4.45837	-3.82	--	1.69238	-1.70887	-2.34177	-3.69995	-3.19268	2.47704	Protein LHY GN=LHY OS=Arabidopsis thaliana (Mouse-ear cress) PE=1 SV=2	AT5G37260.1	CIR1,RVE2	Homeodomain-like superfamily protein	LOC_Os02g46030.1	MYB family transcription factor, putative, expressed
Sobic.006G049900	MYB_related	--	--	-2.10915	--	--	--	--	--	--	--	--	2.13399	Chaperone protein dnaJ 6 GN=MOJ9.8 OS=Arabidopsis thaliana (Mouse-ear cress) PE=1 SV=1	AT3G11450.1	--	DnaJ domain ;Myb-like DNA-binding domain	LOC_Os04g30890.1	MYB family transcription factor, putative, expressed
Sobic.006G192100	MYB_related	--	--	--	--	2.89601	5.08543	2.96004	--	--	1.56366	4.26172	1.99308	Protein LHY GN=LHY OS=Arabidopsis thaliana (Mouse-ear cress) PE=1 SV=2	AT5G17300.1	RVE1	Homeodomain-like superfamily protein	LOC_Os04g49450.1	MYB family transcription factor, putative, expressed
Sobic.001G249800	NAC	--	--	--	--	--	--	--	--	--	--	--	2.12732	--	--	--	--	LOC_Os10g25620.1	no apical meristem protein, expressed
Sobic.003G365500	NAC	--	--	--	-1.4724	-2.81588	-1.85628	-1.88672	--	--	-2.83915	--	--	NAC domain-containing protein 90 GN=NAC090 OS=Arabidopsis thaliana (Mouse-ear cress) PE=2 SV=1	AT5G22380.1	anac090,NAC090	NAC domain containing protein 90	LOC_Os01g64310.1	no apical meristem protein, putative, expressed
Sobic.004G201600	NAC	--	--	--	--	2.94628	--	--	--	--	2.64042	--	2.58362	NAC domain-containing protein 8 GN=NAC008 OS=Arabidopsis thaliana (Mouse-ear cress) PE=2 SV=1	AT1G25580.1	ANAC008,SOG1	NAC (No Apical Meristem) domain transcriptional regulator superfamily protein	LOC_Os02g38130.1	no apical meristem protein, putative, expressed
Sobic.006G147400	NAC	--	--	--	--	--	--	--	--	--	--	-3.06092	--	Protein CUP-SHAPED COTYLEDON 1 GN=F4B12.8 OS=Arabidopsis thaliana (Mouse-ear cress) PE=1 SV=1	AT4G28530.1	anac074,NAC074	NAC domain containing protein 74	LOC_Os04g43560.1	no apical meristem protein, putative, expressed
Sobic.006G174725	NAC	--	--	--	--	--	5.28943	--	--	--	--	--	--	NAC transcription factor ONAC010 GN=ONAC010 OS=Oryza sativa subsp. indica (Rice) PE=2 SV=1	AT1G65910.1	anac028,NAC028	NAC domain containing protein 28	LOC_Os05g43960.1	no apical meristem protein, putative, expressed
Sobic.009G142200	NAC	--	--	--	--	4.82022	3.57147	5.23372	--	--	2.38585	--	5.40833	NAC domain-containing protein 48 OS=Oryza sativa subsp. japonica (Rice) PE=2 SV=1	AT1G01720.1	ANAC002,ATAF1	NAC (No Apical Meristem) domain transcriptional regulator superfamily protein	LOC_Os05g34830.1	No apical meristem protein, putative, expressed
Sobic.003G040500	NF-YC	--	--	--	--	--	--	--	--	--	--	--	-3.55933	Formin-like protein 20 GN=MBK20.20/MBK20.21 OS=Arabidopsis thaliana (Mouse-ear cress) PE=2 SV=3	AT5G43250.1	NF-YC13	nuclear factor Y, subunit C13	LOC_Os01g08790.1	histone-like transcription factor and archaeal histone, putative, expressed
Sobic.004G062100	SBP	--	--	--	--	--	--	--	1.57317	--	--	--	-4.39448	Squamosa promoter-binding-like protein 5 GN=P0504A05.16 OS=Oryza sativa subsp. japonica (Rice) PE=2 SV=1	AT1G02065.1	SPL8	squamosa promoter binding protein-like 8	LOC_Os02g08070.1	OsSPL5 - SBP-box gene family member, expressed
Sobic.007G193500	SBP	--	--	--	--	--	--	--	--	--	--	--	-2.45862	Squamosa promoter-binding-like protein 16 GN=P0702E04.9 OS=Oryza sativa subsp. japonica (Rice) PE=2 SV=1	AT5G50570.2	--	Squamosa promoter-binding protein-like (SBP domain) transcription factor family protein	LOC_Os08g41940.1	OsSPL16 - SBP-box gene family member, expressed
Sobic.010G215700	SBP	--	--	--	--	--	--	--	1.33435	--	--	--	-5.1627	Squamosa promoter-binding-like protein 10 GN=B1047G05.25 OS=Oryza sativa subsp. japonica (Rice) PE=2 SV=1	AT1G02065.1	SPL8	squamosa promoter binding protein-like 8	LOC_Os06g44860.1	OsSPL10 - SBP-box gene family member, expressed
Sobic.004G097700	TALE	--	--	--	--	2.27156	--	--	--	--	--	--	--	Homeobox protein ATH1 GN=ATH1 OS=Arabidopsis thaliana (Mouse-ear cress) PE=1 SV=1	AT4G32980.1	ATH1	homeobox gene 1	LOC_Os02g13310.1	homeobox domain containing protein, expressed
Sobic.004G170700	Trihelix	--	--	--	--	-2.93542	--	--	4.76665	--	3.55201	--	5.10591	Formin-like protein 20 GN=MBK20.20/MBK20.21 OS=Arabidopsis thaliana (Mouse-ear cress) PE=2 SV=3	AT1G21200.1	--	sequence-specific DNA binding transcription factors	LOC_Os02g33770.1	homeodomain, putative, expressed
Sobic.005G047200	Trihelix	--	--	4.3914	--	3.75034	--	--	--	--	--	--	--	--	AT1G76870.1	--	--	LOC_Os11g06410.3	homeodomain, putative, expressed
Sobic.006G094500	Trihelix	--	--	--	--	--	4.3645	--	-3.20536	-4.29475	-4.91172	--	-2.20343	Vegetative cell wall protein gp1 (Precursor) GN=GP1 OS=Chlamydomonas reinhardtii (Chlamydomonas smithii) PE=2 SV=1	AT3G14180.1	--	sequence-specific DNA binding transcription factors	LOC_Os04g36790.1	transcription factor like protein, putative, expressed
Sobic.006G261200	Trihelix	--	--	--	--	--	--	--	1.98136	--	--	--	--	Sulfated surface glycoprotein 185 (Precursor) OS=Volvox carteri (Green alga) PE=1 SV=1	AT1G31310.1	--	hydroxyproline-rich glycoprotein family protein	LOC_Os04g57530.1	transcription factor, putative, expressed
Sobic.002G202800	WRKY	--	--	--	--	--	--	--	--	-2.09054	--	--	--	Probable WRKY transcription factor 40 GN=WRKY40 OS=Arabidopsis thaliana (Mouse-ear cress) PE=1 SV=1	AT4G31800.1	ATWRKY18,WRKY18	WRKY DNA-binding protein 18	LOC_Os09g25070.1	WRKY62, expressed
Sobic.002G418500	WRKY	--	--	-3.62372	--	--	--	-3.43324	--	--	--	--	--	Probable WRKY transcription factor 46 GN=WRKY46 OS=Arabidopsis thaliana (Mouse-ear cress) PE=2 SV=1	AT2G46400.1	ATWRKY46,WRKY46	WRKY DNA-binding protein 46	LOC_Os07g48260.1	WRKY47, expressed
Sobic.003G037500	WRKY	--	--	--	-3.91564	--	--	--	--	--	--	--	--	Probable WRKY transcription factor 72 GN=WRKY72 OS=Arabidopsis thaliana (Mouse-ear cress) PE=2 SV=1	AT4G04450.1	AtWRKY42,WRKY42	WRKY family transcription factor	LOC_Os01g09080.1	WRKY107, expressed
Sobic.003G226600	WRKY	--	--	--	--	--	2.35246	--	--	--	--	3.40966	--	Probable WRKY transcription factor 27 GN=WRKY27 OS=Arabidopsis thaliana (Mouse-ear cress) PE=2 SV=1	AT4G01250.1	AtWRKY22,WRKY22	WRKY family transcription factor	LOC_Os01g43550.2	WRKY12, expressed
Sobic.007G072133	WRKY	--	--	--	--	--	1.68389	1.54489	--	--	--	--	--	Putative AC transposase OS=Zea mays (Maize) PE=2 SV=2	AT3G42170.1	--	BED zinc finger ;hAT family dimerisation domain	LOC_Os09g21430.1	ZOS9-05 - C2H2 zinc finger protein, expressed
Sobic.008G028600	WRKY	--	--	--	-1.76772	--	-1.78128	--	--	--	--	--	--	Probable WRKY transcription factor 54 GN=WRKY54 OS=Arabidopsis thaliana (Mouse-ear cress) PE=2 SV=2	AT2G40750.1	ATWRKY54,WRKY54	WRKY DNA-binding protein 54	LOC_Os09g09630.1	WRKY112, expressed
Sobic.008G029000	WRKY	--	--	--	--	--	--	--	--	--	--	-3.55314	--	Probable WRKY transcription factor 62 GN=WRKY62 OS=Arabidopsis thaliana (Mouse-ear cress) PE=1 SV=2	AT3G56400.1	ATWRKY70,WRKY70	WRKY DNA-binding protein 70	LOC_Os12g02450.1	WRKY64, expressed
Sobic.008G029200	WRKY	--	--	--	--	--	--	--	--	-2.56827	-4.09343	-4.38306	-2.66425	Probable WRKY transcription factor 67 GN=WRKY67 OS=Arabidopsis thaliana (Mouse-ear cress) PE=2 SV=1	AT2G46400.1	ATWRKY46,WRKY46	WRKY DNA-binding protein 46	LOC_Os11g02520.1	WRKY104, expressed
Sobic.010G045700	WRKY	--	--	--	--	--	--	--	--	--	--	--	2.00234	Probable WRKY transcription factor 53 GN=WRKY53 OS=Arabidopsis thaliana (Mouse-ear cress) PE=1 SV=1	AT4G23810.1	ATWRKY53,WRKY53	WRKY family transcription factor	LOC_Os06g06360.1	WRKY113, expressed
Sobic.004G302700	YABBY	--	--	--	--	--	--	--	1.08421	--	--	-1.61839	-4.41622	Protein YABBY 4 OS=Oryza sativa subsp. japonica (Rice) PE=2 SV=1	AT2G45190.1	AFO,FIL,YAB1	Plant-specific transcription factor YABBY family protein	LOC_Os02g42950.1	YABBY domain containing protein, putative, expressed
