# Supplementary material for: Comparative Transcriptome Analysis of Two Sweet Sorghum Genotypes with Different Salt Tolerance Abilities to Reveal the Mechanism of Salt Tolerance
Source: Int J Mol Sci. 2022 Feb 18;23(4):2272. doi: 10.3390/ijms23042272 (PMC8877675; doi:10.3390/ijms23042272)
Supplement: Supplementary file 1 [file ijms-23-02272-s001.zip › TableS6-qRT-PCR primer.xlsx]

## Sheet: Sheet1
Table S6 Primer sequences for quantitative real-time PCR analysis.
Gene ID	Forward (5'-3')	Reverse (5'-3')
Sobic.002G368000	TCTGGTGGTCCCCTAGTCAG	GGCACGTTCATCAGACCAGA
Sobic.005G137300	AACAAAGGGCAACGGAGGTT	TCAAGAATGGCAACTGGGGA
Sobic.003G230900	GCTCATAGTGTTCTCGTGTTGT	GGGCAAGGCGTAAGCTGAAA
Sobic.010G071800	AAACACAGGAAGCCCAGCA	CACCAGCACATGAACAGACAA
Sobic.002G366500	GGCCGAGGCGATAAGGAAAA	GATCTCCGGCAAGCCATCAA
Sobic.002G125700	GAGCTGCCATAGGCTTGTCT	GGTCCGCTTTGAAGTCATGTT
Sobic.002G214800	CTCCTTGGCACGCGCTATT	AGAGACACACAGCCTCCGAC
Sobic.003G373000	ACGGTTGATCGGTTGTTGTGA	GCATGACGGATTCTCGCACT
Sobic.008G020300	CTTACCTCCCGCAGAGAACC	CCGGTATGATGGGAGATTCGG
Sobic.007G062200	CCATTCGATTAAACTTCACATCCT	ATGAGTGTGGCGTGTGGTAG
Sobic.007G178300	TCTGTGGAGTTTGGTGGCTC	CAGCATGGTTGTCTCCCCAT
Sobic.001G079500	TTTGTGTTCATGCCTTGCCG	GACTGCTCCGTTTCTTCCCA
SbPP2A	AACCCGCAAAACCCCAGACTA	TACAGGTCGGGCTCATGGAAC
